# Supplementary material for: Antioxidant, Cytotoxic, and Rheological Properties of Canola Oil Extract of Usnea barbata (L.) Weber ex F.H. Wigg from Călimani Mountains, Romania
Source: MDPI journal article supplement (doi:10.3390/plants11070854), 2022-03-23
Supplement: s1 [file s1]

## Sample Replicate Report - Multi-Channel

|                    |                                                                                                          |                  |            |
|--------------------|----------------------------------------------------------------------------------------------------------|------------------|------------|
| Sample Name        | UA std 2.5 ug/mL                                                                                         |                  |            |
| Batch Group/Name   | UMF Ovidius/20211109 Usnea barbata oil extract - Copy 11-10-2021 08-56-41 - Copy 11-10-2021 09-15-52 - C |                  |            |
| Acquisition Method | 20211103 Usnic Acid Oil                                                                                  |                  |            |
| Processing Method  | 20211103 Usnic Acid Oil                                                                                  |                  |            |
| Instrument Name    | HPLC-PDA Plus                                                                                            |                  |            |
| Vial Number        | 4                                                                                                        | Operator         | dan.rambu  |
| Acquisition Date   | 11/9/2021                                                                                                | Chromera Version | 4.2.0.6415 |

UA std 2.5 ug/mL : 320:10:400:10 : 1

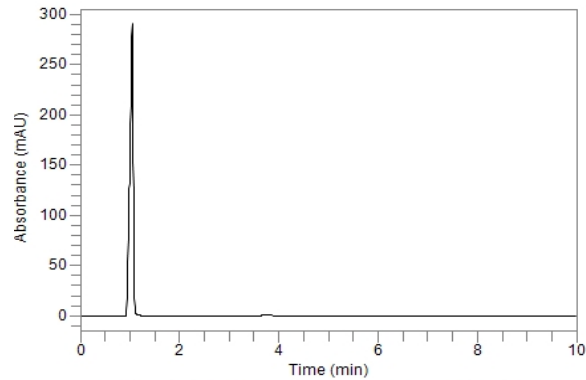

UA std 2.5 ug/mL : 320:10:400:10 : 2

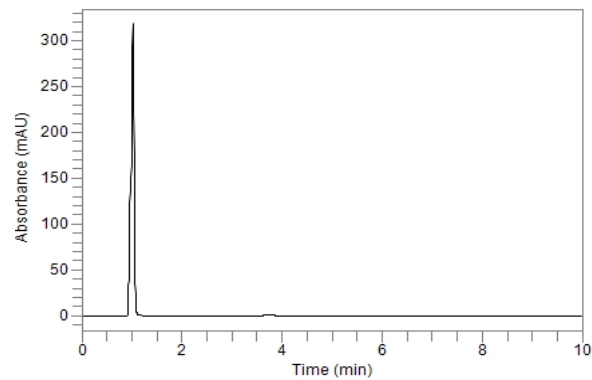

UA std 2.5 ug/mL : 320:10:400:10 : 3

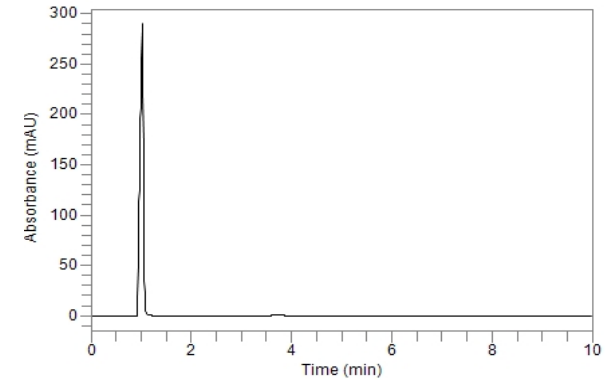

UA std 2.5 ug/mL : 320:10:400:10 : 4

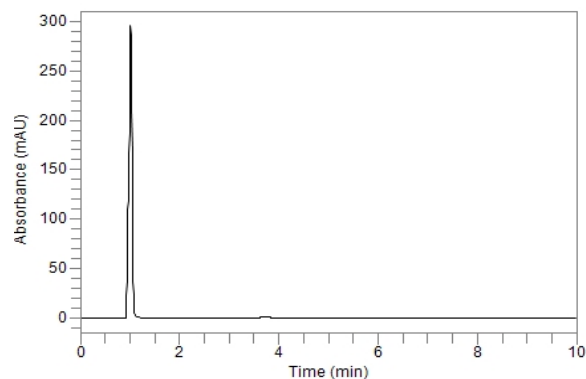

UA std 2.5 ug/mL : 320:10:400:10 : 5

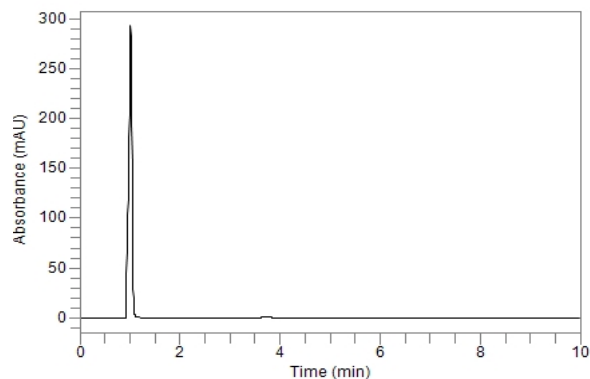

Channel Name 320:10:400:10

| Component Name | Avg RT (min) | RT %RSD | Avg Area | Area %RSD | Avg Height | Height %RSD | Avg Final Amount | Final %RSD |
|----------------|--------------|---------|----------|-----------|------------|-------------|------------------|------------|
|                | N/A          | N/A     | N/A      | N/A       | N/A        | N/A         | N/A              | N/A        |

UA std 2.5 ug/mL : 282:10:400:10 : 1

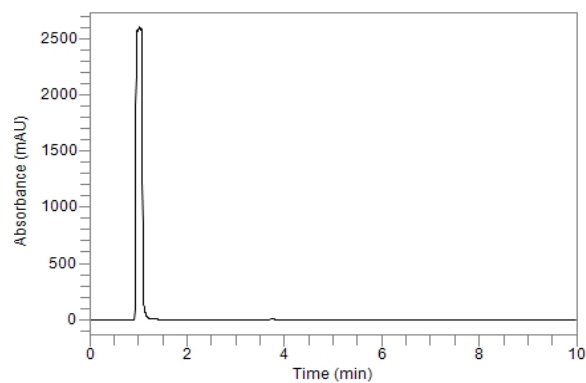

UA std 2.5 ug/mL : 282:10:400:10 : 2

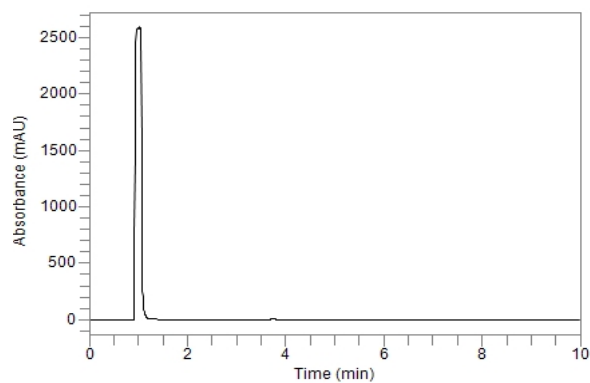

UA std 2.5 ug/mL : 282:10:400:10 : 3

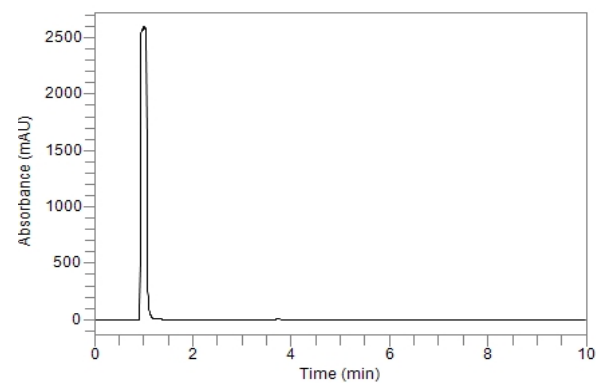

UA std 2.5 ug/mL : 282:10:400:10 : 4

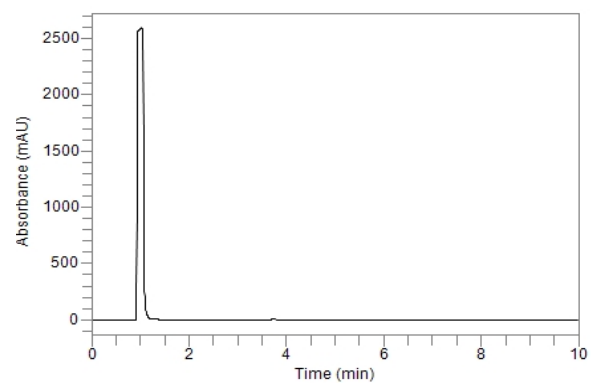

UA std 2.5 ug/mL : 282:10:400:10 : 5

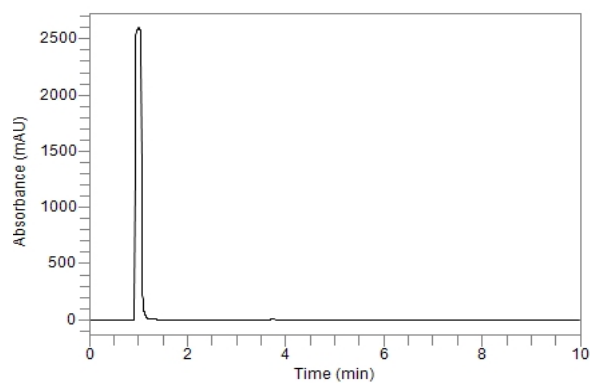

Channel Name 282:10:400:10

| Component Name | Avg RT (min) | RT %RSD | Avg Area | Area %RSD | Avg Height | Height %RSD | Avg Final Amount | Final %RSD |
|----------------|--------------|---------|----------|-----------|------------|-------------|------------------|------------|
| Usnic Acid     | 3.741        | 0.284   | 34,307.6 | 1.465     | 3,508.7    | 0.547       | 3.2255           | 1.071      |

Copy 11-10-

## Sample Replicate Report - Multi-Channel

|                    |                                                                                                          |                  |            |
|--------------------|----------------------------------------------------------------------------------------------------------|------------------|------------|
| Sample Name        | UA std 5 ug/mL                                                                                           |                  |            |
| Batch Group/Name   | UMF Ovidius/20211109 Usnea barbata oil extract - Copy 11-10-2021 08-56-41 - Copy 11-10-2021 09-15-52 - C |                  |            |
| Acquisition Method | 20211103 Usnic Acid Oil                                                                                  |                  |            |
| Processing Method  | 20211103 Usnic Acid Oil                                                                                  |                  |            |
| Instrument Name    | HPLC-PDA Plus                                                                                            |                  |            |
| Vial Number        | 5                                                                                                        | Operator         | dan.rambu  |
| Acquisition Date   | 11/9/2021                                                                                                | Chromera Version | 4.2.0.6415 |

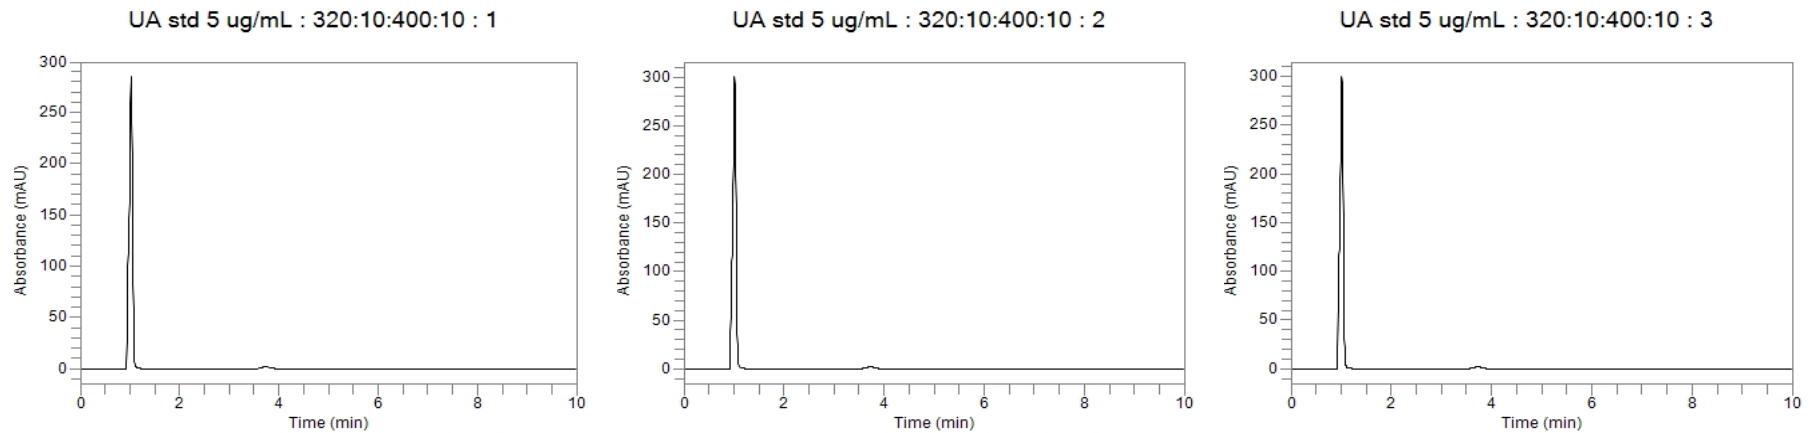

UA std 5 ug/mL : 320:10:400:10 : 4

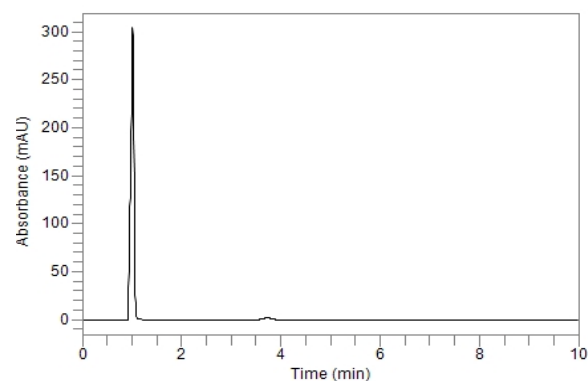

UA std 5 ug/mL : 320:10:400:10 : 5

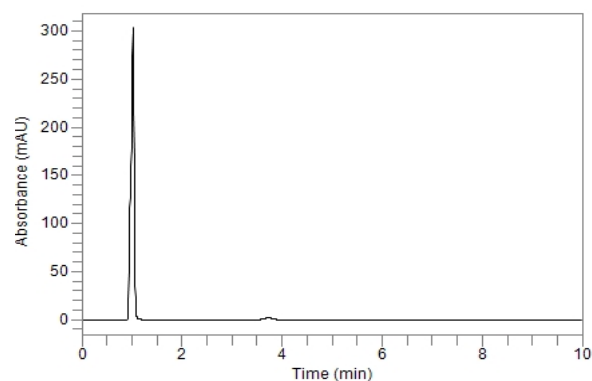

Channel Name 320:10:400:10

| Component Name | Avg RT (min) | RT %RSD | Avg Area | Area %RSD | Avg Height | Height %RSD | Avg Final Amount | Final %RSD |
|----------------|--------------|---------|----------|-----------|------------|-------------|------------------|------------|
|                | N/A          | N/A     | N/A      | N/A       | N/A        | N/A         | N/A              | N/A        |

UA std 5 ug/mL : 282:10:400:10 : 1

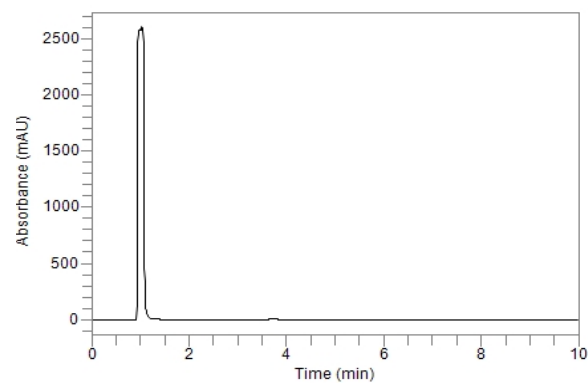

UA std 5 ug/mL : 282:10:400:10 : 2

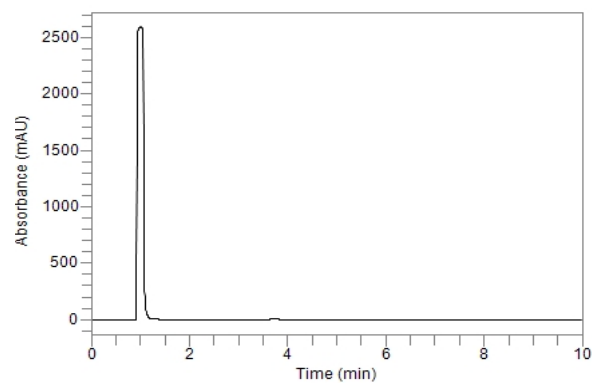

UA std 5 ug/mL : 282:10:400:10 : 3

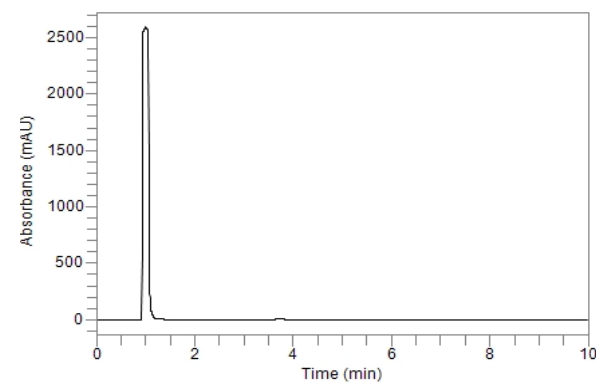

UA std 5 ug/mL : 282:10:400:10 : 4

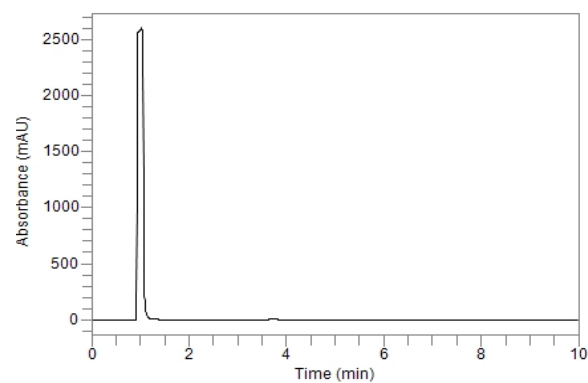

UA std 5 ug/mL : 282:10:400:10 : 5

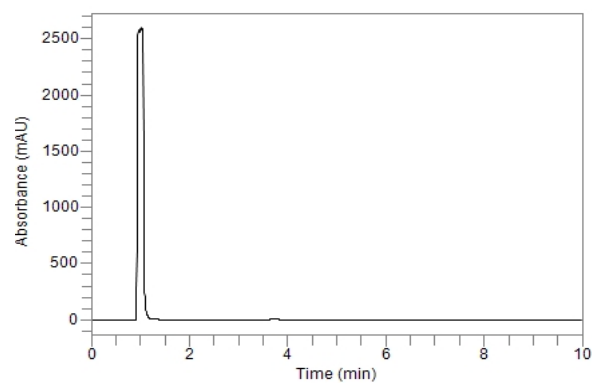

Channel Name 282:10:400:10

| Component Name | Avg RT (min) | RT %RSD | Avg Area | Area %RSD | Avg Height | Height %RSD | Avg Final Amount | Final %RSD |
|----------------|--------------|---------|----------|-----------|------------|-------------|------------------|------------|
| Usnic Acid     | 3.730        | 0.129   | 73,474.0 | 1.448     | 7,214.1    | 1.677       | 5.9175           | 1.235      |

Copy 11-10-



## Sample Replicate Report - Multi-Channel

|                    |                                                                                                          |                  |            |
|--------------------|----------------------------------------------------------------------------------------------------------|------------------|------------|
| Sample Name        | UA std 10 ug/mL                                                                                          |                  |            |
| Batch Group/Name   | UMF Ovidius/20211109 Usnea barbata oil extract - Copy 11-10-2021 08-56-41 - Copy 11-10-2021 09-15-52 - C |                  |            |
| Acquisition Method | 20211103 Usnic Acid Oil                                                                                  |                  |            |
| Processing Method  | 20211103 Usnic Acid Oil                                                                                  |                  |            |
| Instrument Name    | HPLC-PDA Plus                                                                                            |                  |            |
| Vial Number        | 6                                                                                                        | Operator         | dan.rambu  |
| Acquisition Date   | 11/9/2021                                                                                                | Chromera Version | 4.2.0.6415 |

UA std 10 ug/mL : 320:10:400:10 : 1

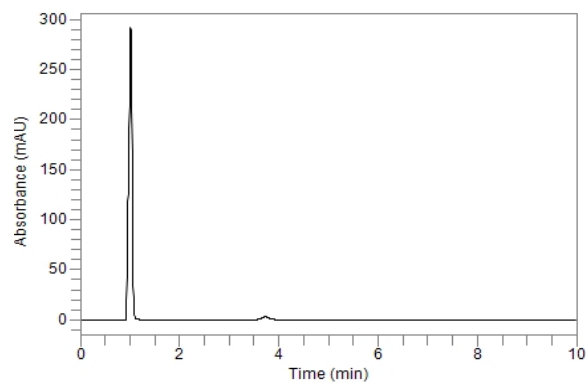

UA std 10 ug/mL : 320:10:400:10 : 2

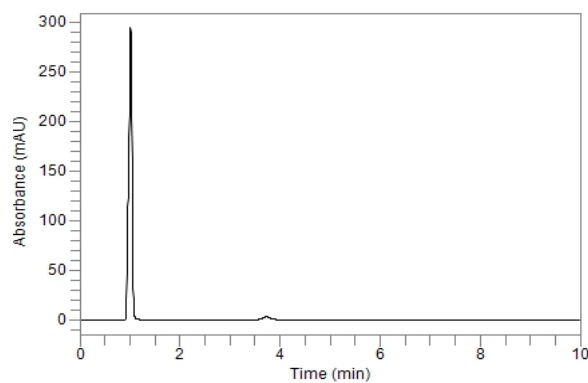

UA std 10 ug/mL : 320:10:400:10 : 3

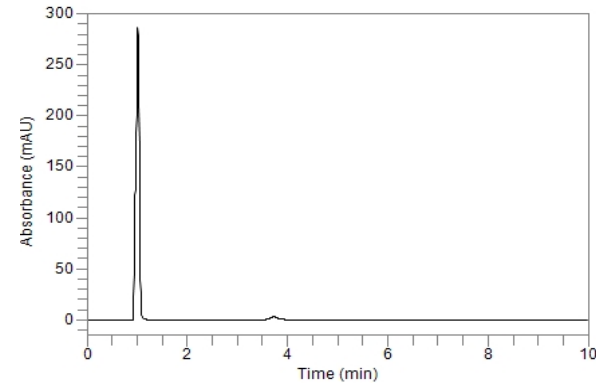

UA std 10 ug/mL : 320:10:400:10 : 4

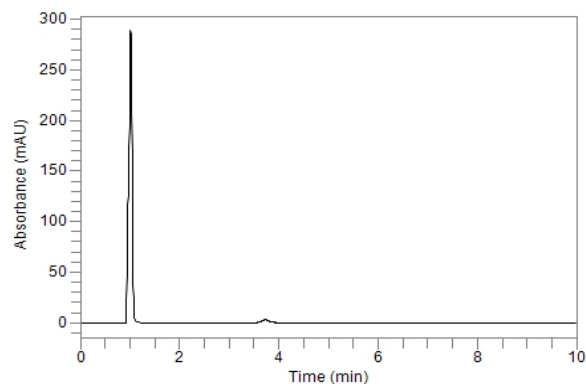

UA std 10 ug/mL : 320:10:400:10 : 5

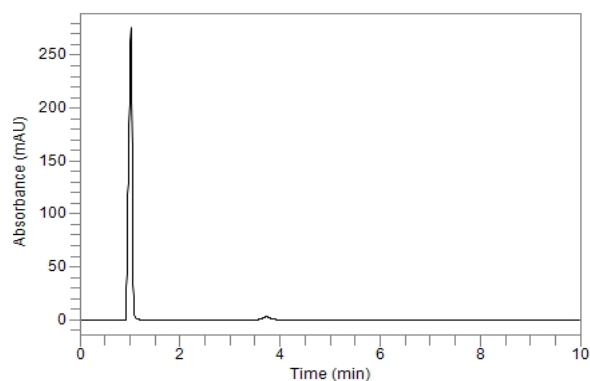

Channel Name 320:10:400:10

| Component Name | Avg RT (min) | RT %RSD | Avg Area | Area %RSD | Avg Height | Height %RSD | Avg Final Amount | Final %RSD |
|----------------|--------------|---------|----------|-----------|------------|-------------|------------------|------------|
|                | N/A          | N/A     | N/A      | N/A       | N/A        | N/A         | N/A              | N/A        |

UA std 10 ug/mL : 282:10:400:10 : 1

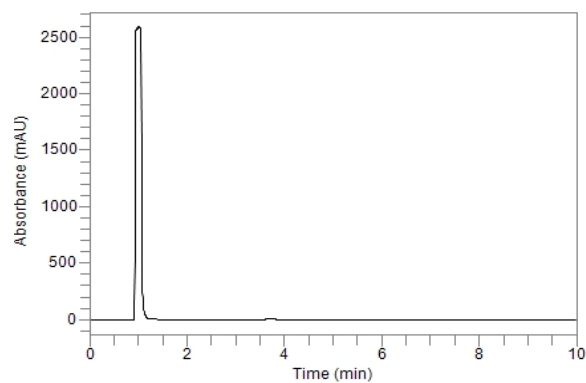

UA std 10 ug/mL : 282:10:400:10 : 2

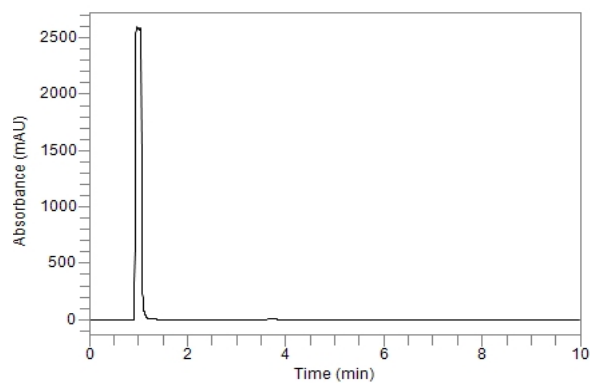

UA std 10 ug/mL : 282:10:400:10 : 3

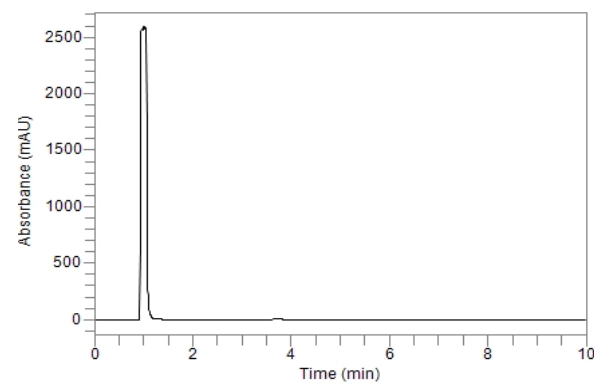

UA std 10 ug/mL : 282:10:400:10 : 4

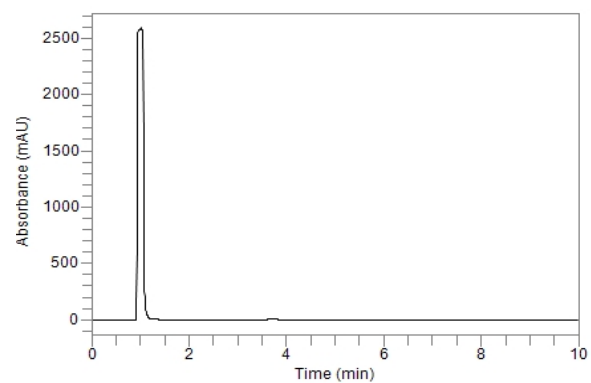

UA std 10 ug/mL : 282:10:400:10 : 5

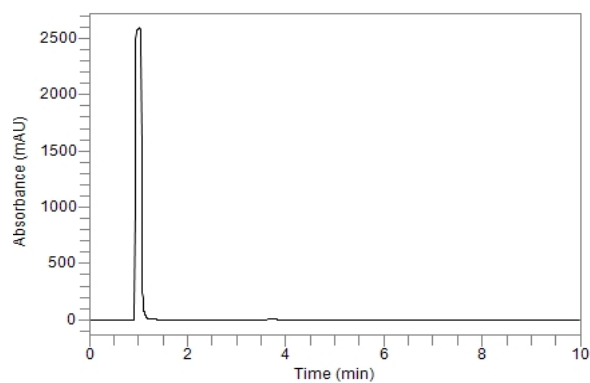

Channel Name 282:10:400:10

| Component Name | Avg RT (min) | RT %RSD | Avg Area  | Area %RSD | Avg Height | Height %RSD | Avg Final Amount | Final %RSD |
|----------------|--------------|---------|-----------|-----------|------------|-------------|------------------|------------|
| Usnic Acid     | 3.730        | 0.046   | 101,020.2 | 1.206     | 9,864.4    | 0.554       | 7.8107           | 1.072      |

Copy 11-10-

## Sample Replicate Report - Multi-Channel

|                    |                                                                                                          |                  |            |
|--------------------|----------------------------------------------------------------------------------------------------------|------------------|------------|
| Sample Name        | UA std 25 ug/mL                                                                                          |                  |            |
| Batch Group/Name   | UMF Ovidius/20211109 Usnea barbata oil extract - Copy 11-10-2021 08-56-41 - Copy 11-10-2021 09-15-52 - C |                  |            |
| Acquisition Method | 20211103 Usnic Acid Oil                                                                                  |                  |            |
| Processing Method  | 20211103 Usnic Acid Oil                                                                                  |                  |            |
| Instrument Name    | HPLC-PDA Plus                                                                                            |                  |            |
| Vial Number        | 7                                                                                                        | Operator         | dan.rambu  |
| Acquisition Date   | 11/9/2021                                                                                                | Chromera Version | 4.2.0.6415 |

UA std 25 ug/mL : 320:10:400:10 : 1

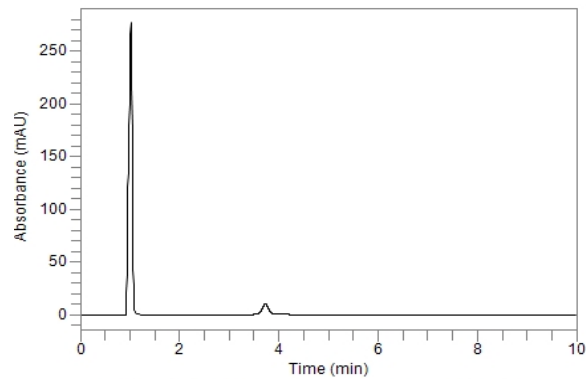

UA std 25 ug/mL : 320:10:400:10 : 2

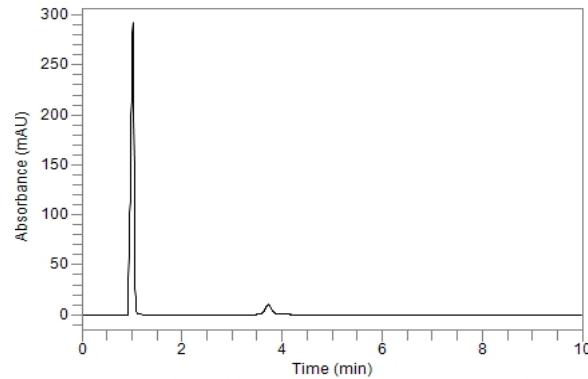

UA std 25 ug/mL : 320:10:400:10 : 3

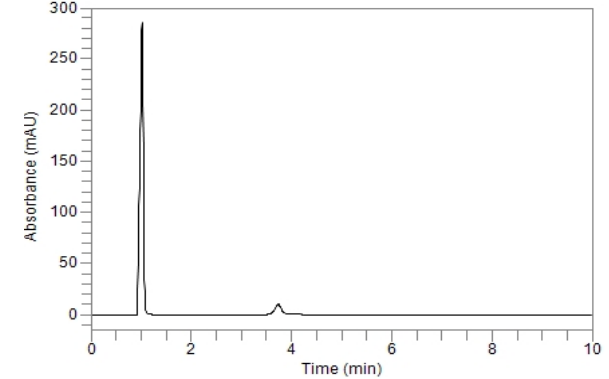

UA std 25 ug/mL : 320:10:400:10 : 4

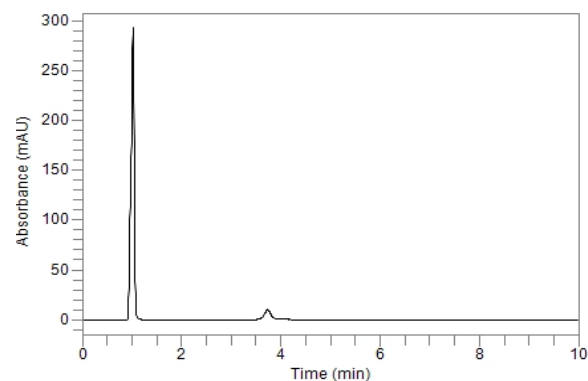

UA std 25 ug/mL : 320:10:400:10 : 5

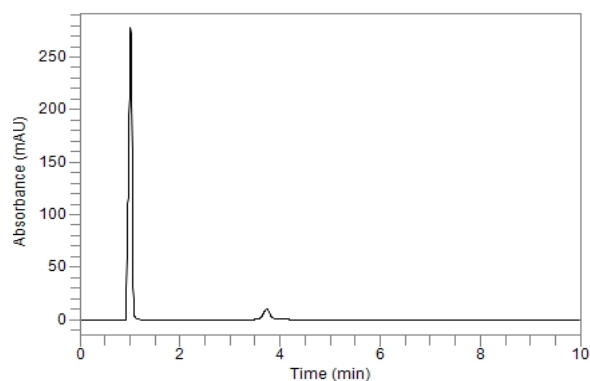

Channel Name 320:10:400:10

| Component Name | Avg RT (min) | RT %RSD | Avg Area | Area %RSD | Avg Height | Height %RSD | Avg Final Amount | Final %RSD |
|----------------|--------------|---------|----------|-----------|------------|-------------|------------------|------------|
|                | N/A          | N/A     | N/A      | N/A       | N/A        | N/A         | N/A              | N/A        |

UA std 25 ug/mL : 282:10:400:10 : 1

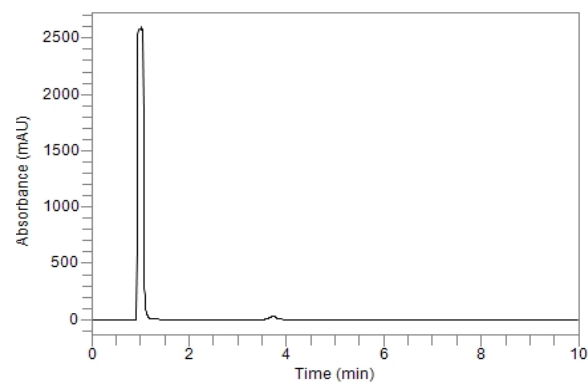

UA std 25 ug/mL : 282:10:400:10 : 2

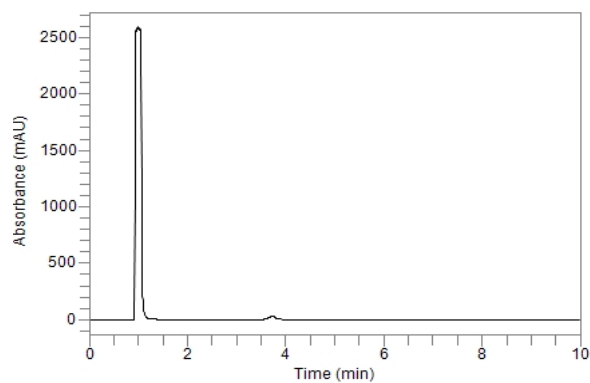

UA std 25 ug/mL : 282:10:400:10 : 3

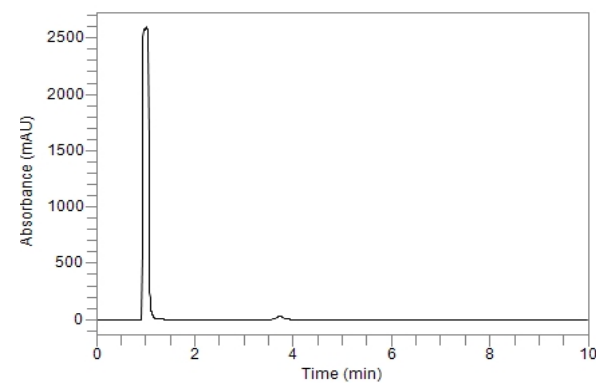

UA std 25 ug/mL : 282:10:400:10 : 4

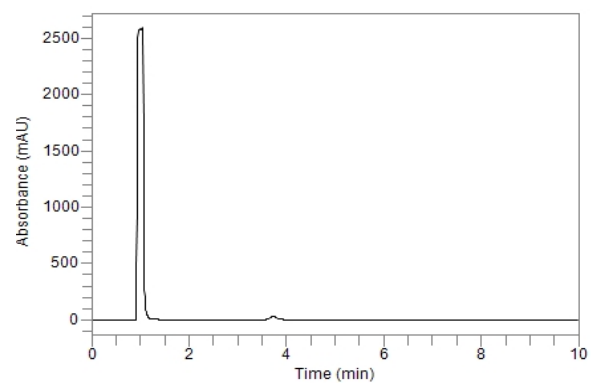

UA std 25 ug/mL : 282:10:400:10 : 5

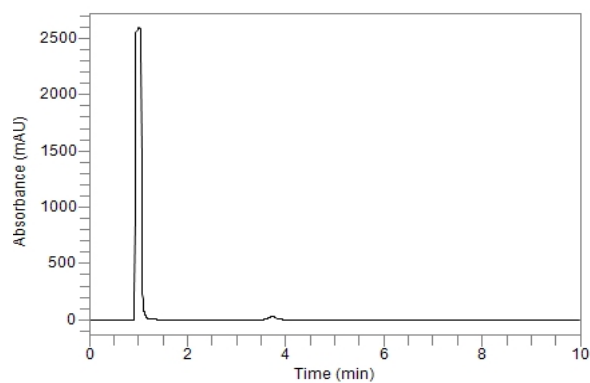

Channel Name 282:10:400:10

| Component Name | Avg RT (min) | RT %RSD | Avg Area  | Area %RSD | Avg Height | Height %RSD | Avg Final Amount | Final %RSD |
|----------------|--------------|---------|-----------|-----------|------------|-------------|------------------|------------|
| Usnic Acid     | 3.732        | 0.087   | 342,590.6 | 1.985     | 32,796.4   | 0.574       | 24.4142          | 1.915      |

Copy 11-10-



## Sample Replicate Report - Multi-Channel

|                    |                                                                                                          |                  |            |
|--------------------|----------------------------------------------------------------------------------------------------------|------------------|------------|
| Sample Name        | UA std 50 ug/mL                                                                                          |                  |            |
| Batch Group/Name   | UMF Ovidius/20211109 Usnea barbata oil extract - Copy 11-10-2021 08-56-41 - Copy 11-10-2021 09-15-52 - C |                  |            |
| Acquisition Method | 20211103 Usnic Acid Oil                                                                                  |                  |            |
| Processing Method  | 20211103 Usnic Acid Oil                                                                                  |                  |            |
| Instrument Name    | HPLC-PDA Plus                                                                                            |                  |            |
| Vial Number        | 8                                                                                                        | Operator         | dan.rambu  |
| Acquisition Date   | 11/9/2021                                                                                                | Chromera Version | 4.2.0.6415 |

UA std 50 ug/mL : 320:10:400:10 : 1

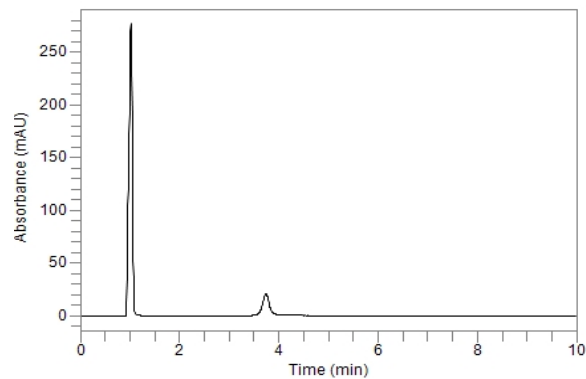

UA std 50 ug/mL : 320:10:400:10 : 2

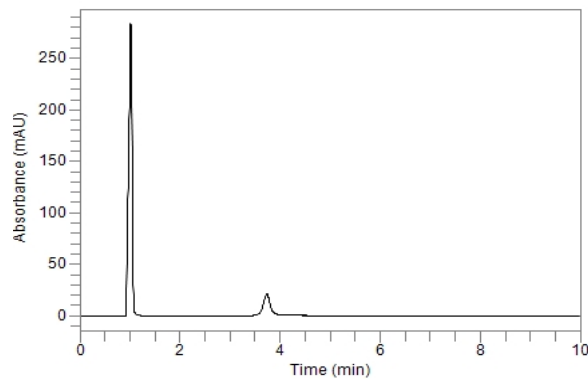

UA std 50 ug/mL : 320:10:400:10 : 3

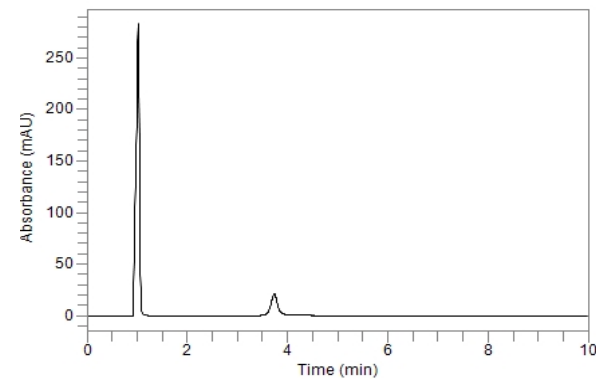

UA std 50 ug/mL : 320:10:400:10 : 4

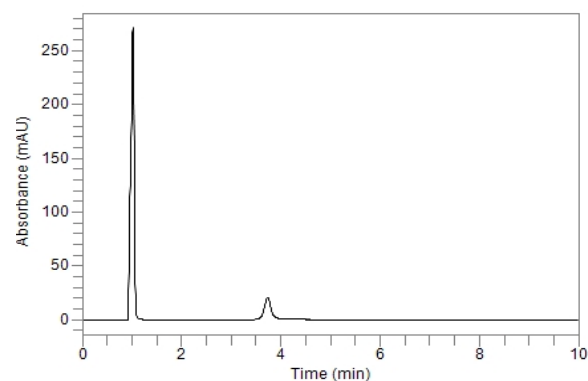

UA std 50 ug/mL : 320:10:400:10 : 5

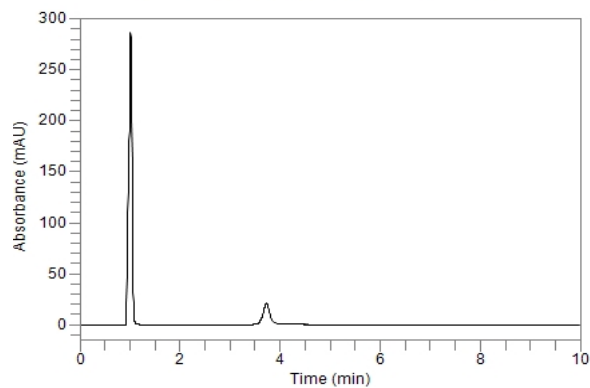

Channel Name 320:10:400:10

| Component Name | Avg RT (min) | RT %RSD | Avg Area | Area %RSD | Avg Height | Height %RSD | Avg Final Amount | Final %RSD |
|----------------|--------------|---------|----------|-----------|------------|-------------|------------------|------------|
|                | N/A          | N/A     | N/A      | N/A       | N/A        | N/A         | N/A              | N/A        |

UA std 50 ug/mL : 282:10:400:10 : 1

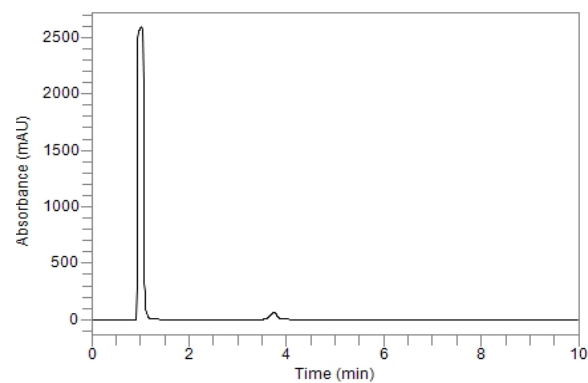

UA std 50 ug/mL : 282:10:400:10 : 2

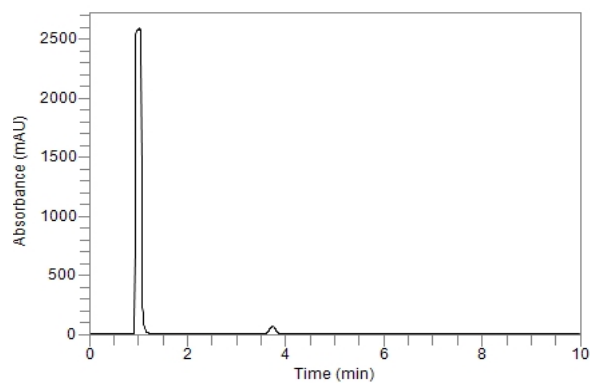

UA std 50 ug/mL : 282:10:400:10 : 3

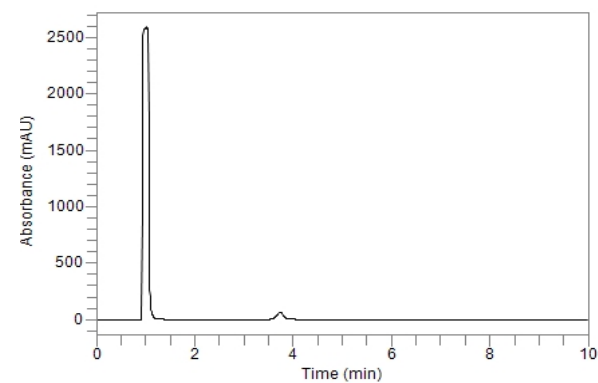

UA std 50 ug/mL : 282:10:400:10 : 4

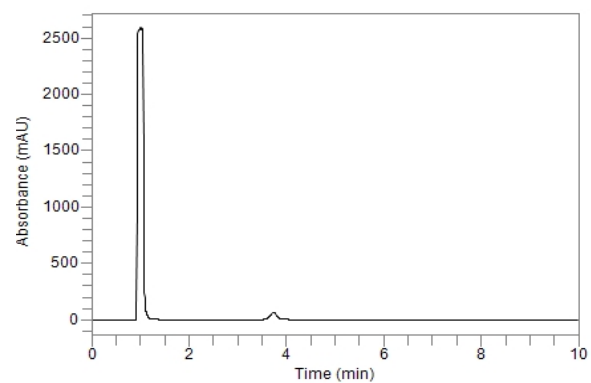

UA std 50 ug/mL : 282:10:400:10 : 5

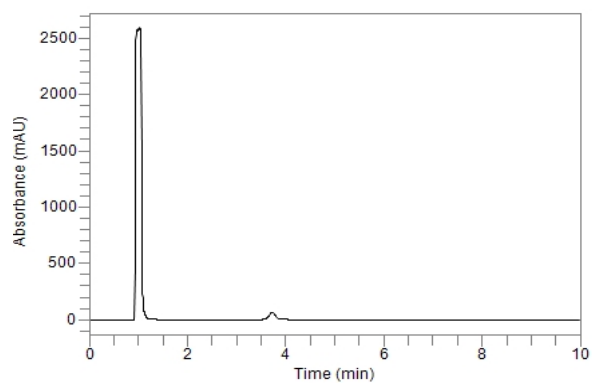

Channel Name 282:10:400:10

| Component Name | Avg RT (min) | RT %RSD | Avg Area  | Area %RSD | Avg Height | Height %RSD | Avg Final Amount | Final %RSD |
|----------------|--------------|---------|-----------|-----------|------------|-------------|------------------|------------|
| Usnic Acid     | 3.735        | 0.115   | 712,154.0 | 2.152     | 67,653.2   | 0.845       | 49.8148          | 2.115      |

Copy 11-10-

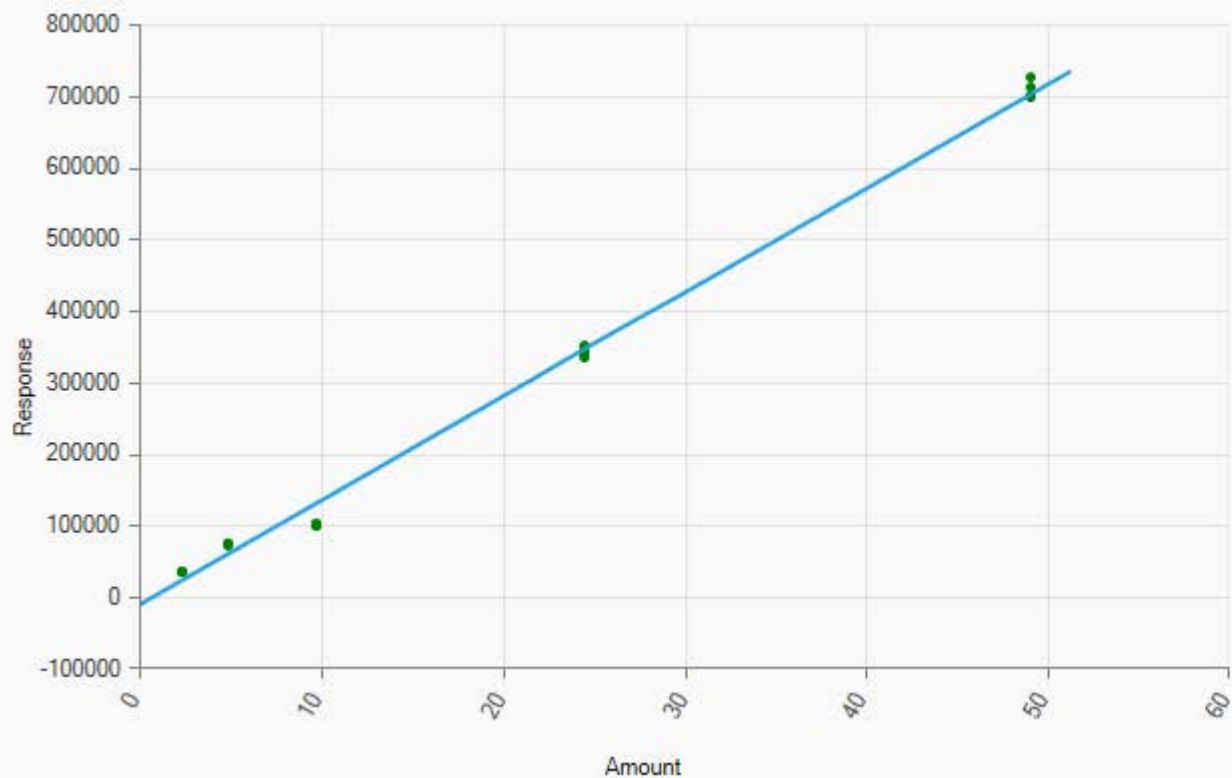

#### Component Definition

|                    |                           |
|--------------------|---------------------------|
| Name:              | 282:10:400:10: Usnic Acid |
| Calibration Type:  | Linear - Ignore Origin    |
| Scaling:           | None                      |
| Weighting:         | None                      |
| Internal Standard: |                           |

#### Calibration Curve

Equation:  $y = 14.54939E+3 x + -12.62135E+3$

#### Curve Statistics:

$r^2 = 0.99507$

%RSE = 22.6
