# Supplementary material for: Antioxidant, Cytotoxic, and Rheological Properties of Canola Oil Extract of Usnea barbata (L.) Weber ex F.H. Wigg from Călimani Mountains, Romania
Source: MDPI journal article supplement (doi:10.3390/plants11070854), 2022-03-23
Supplement: s1 [file s1]

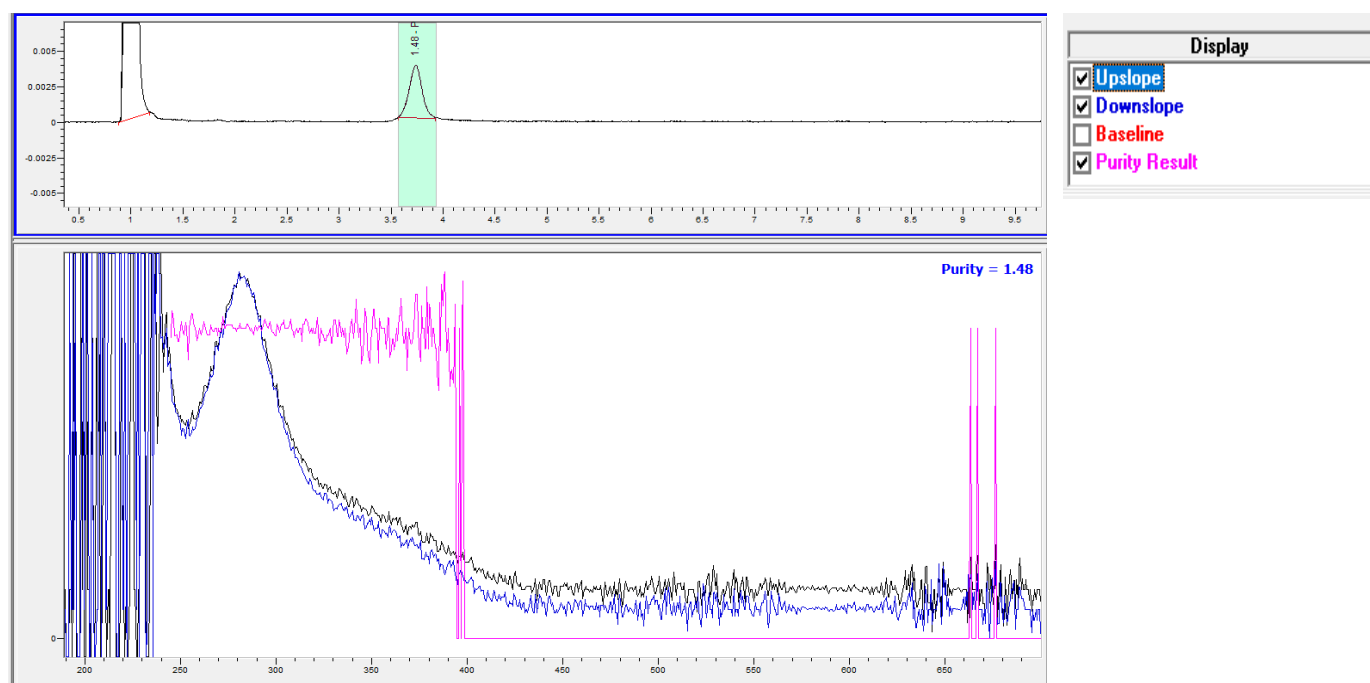

**Figure S1.** Spectral reprocessing on 240–700 nm range at 15% of peak height for peak identity confirmation and peak purity determination for usnic acid
