# Supplementary material for: Antioxidant, Cytotoxic, and Rheological Properties of Canola Oil Extract of Usnea barbata (L.) Weber ex F.H. Wigg from Călimani Mountains, Romania
Source: MDPI journal article supplement (doi:10.3390/plants11070854), 2022-03-23
Supplement: s1 [file s1]

## Sample Report - Multi-Channel

|                       |                                                                 |                  |          |
|-----------------------|-----------------------------------------------------------------|------------------|----------|
| Sample Name           | QC 7.5 ug/mL                                                    |                  |          |
| Batch Group/Name      | UMF Ovidius/20211109 Usnea barbata oil extract - Copy 11-10-202 |                  |          |
| Acquisition Date/Time | 11.9.2021 10:19:54 PM                                           |                  |          |
| Acquisition Method    | 20211103 Usnic Acid Oil                                         |                  |          |
| Processing Method     | 20211103 Usnic Acid Oil                                         |                  |          |
| Instrument Name       | HPLC-PDA Plus                                                   |                  |          |
| Vial Number           | 9                                                               | Injection Number | 1        |
| Operator              | dan.rambu                                                       | Chromera Version | 4.2.0.64 |

QC 7.5 ug/mL : 320:10:400:10 : 1

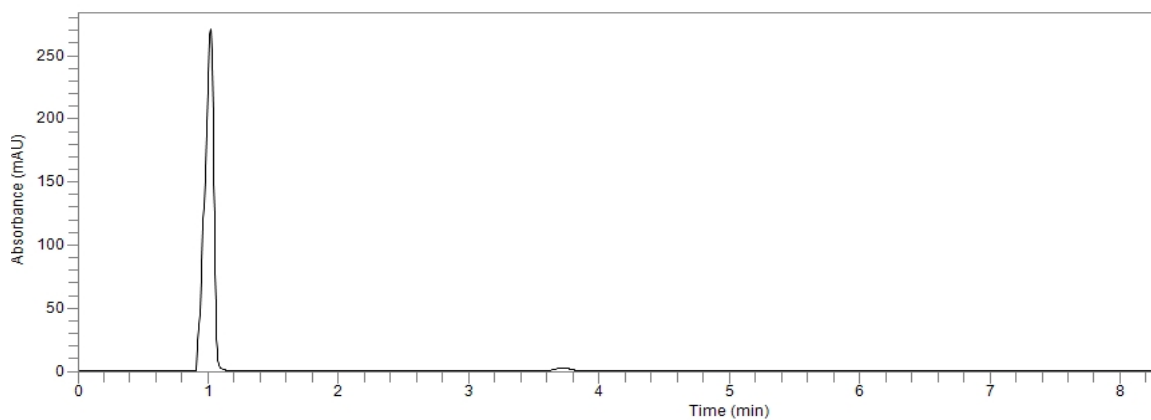

QC 7.5 ug/mL : 282:10:400:10 : 1

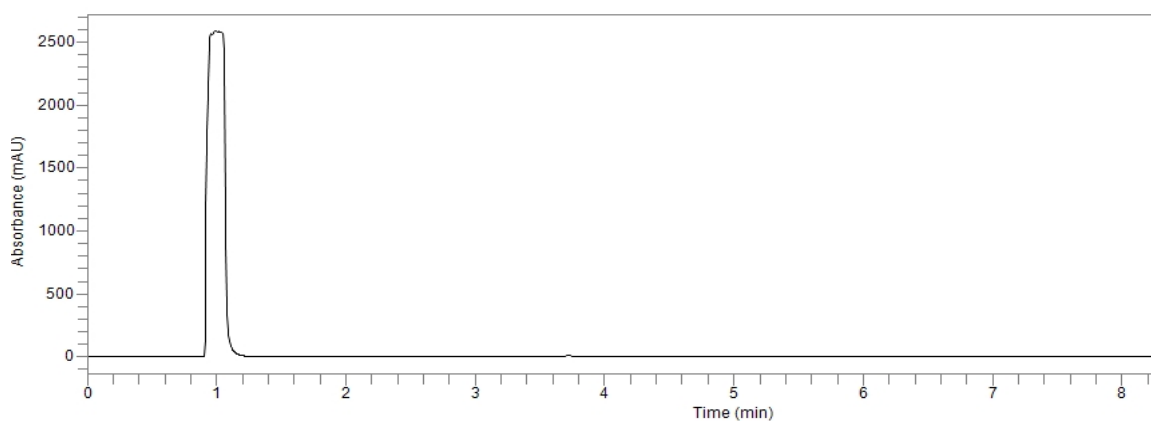

| Peak # | RT (min) | Component Name | Channel       | Area       | Height    | BL |
|--------|----------|----------------|---------------|------------|-----------|----|
| 1      | 0.997    |                | 282:10:400:10 | 22,677,961 | 2,590,940 | BB |

|              |       |            |               |            |         |    |
|--------------|-------|------------|---------------|------------|---------|----|
| 1            | 1.016 |            | 320:10:400:10 | 1,344,208  | 271,096 | BB |
| 2            | 3.723 | Usnic Acid | 282:10:400:10 | 88,436     | 8,764   | BB |
| 2            | 3.724 |            | 320:10:400:10 | 24,739     | 2,682   | BB |
| <b>Total</b> |       |            |               | 24,135,343 |         |    |

1 08-56-41 - Copy 11-

415

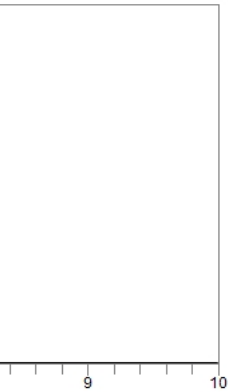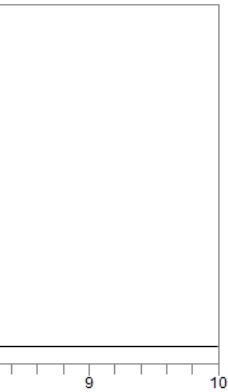

| Final Amount | Units |
|--------------|-------|
|              |       |

|        |       |
|--------|-------|
|        |       |
| 6,9458 | µg/mL |
|        |       |
| 6.9458 |       |

## Sample Report - Multi-Channel

|                       |                                                                 |                  |          |
|-----------------------|-----------------------------------------------------------------|------------------|----------|
| Sample Name           | QC 7.5 ug/mL                                                    |                  |          |
| Batch Group/Name      | UMF Ovidius/20211109 Usnea barbata oil extract - Copy 11-10-202 |                  |          |
| Acquisition Date/Time | 11.9.2021 10:54:58 PM                                           |                  |          |
| Acquisition Method    | 20211103 Usnic Acid Oil                                         |                  |          |
| Processing Method     | 20211103 Usnic Acid Oil                                         |                  |          |
| Instrument Name       | HPLC-PDA Plus                                                   |                  |          |
| Vial Number           | 9                                                               | Injection Number | 4        |
| Operator              | dan.rambu                                                       | Chromera Version | 4.2.0.64 |

QC 7.5 ug/mL : 320:10:400:10 : 4

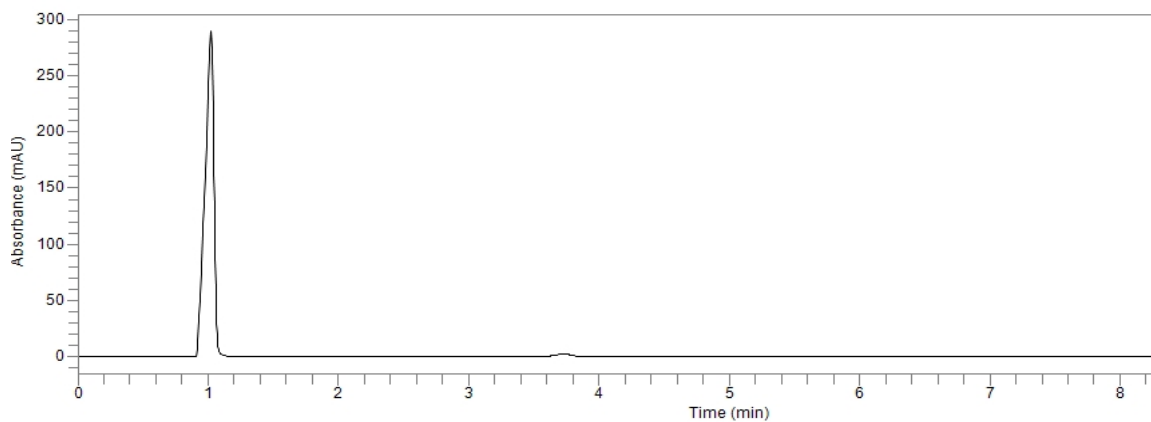

QC 7.5 ug/mL : 282:10:400:10 : 4

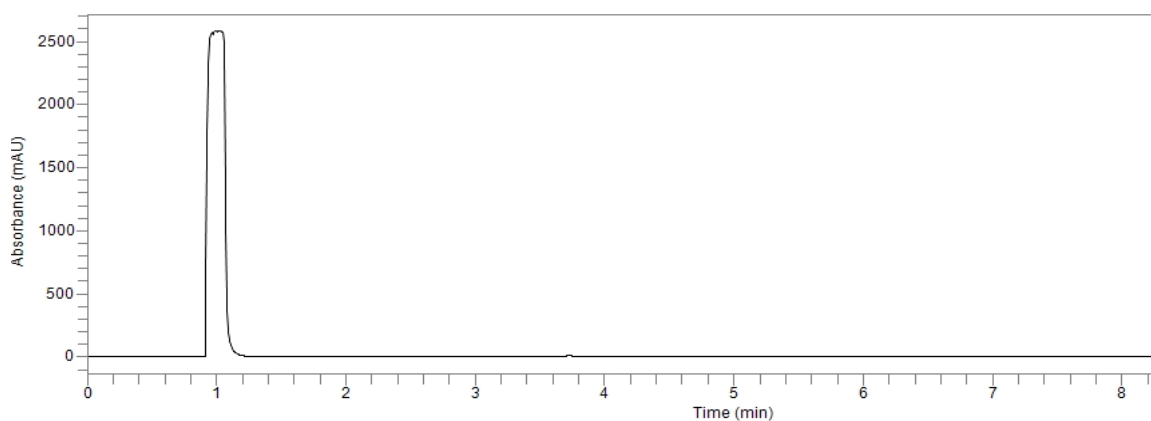

| Peak # | RT (min) | Component Name | Channel       | Area       | Height    | BL |
|--------|----------|----------------|---------------|------------|-----------|----|
| 1      | 0.995    |                | 282:10:400:10 | 22,603,492 | 2,585,938 | BB |

|              |       |            |               |            |         |    |
|--------------|-------|------------|---------------|------------|---------|----|
| 1            | 1.019 |            | 320:10:400:10 | 1,405,142  | 290,302 | BB |
| 2            | 3.727 |            | 320:10:400:10 | 27,012     | 2,765   | BB |
| 2            | 3.728 | Usnic Acid | 282:10:400:10 | 92,735     | 8,982   | BB |
| <b>Total</b> |       |            |               | 24,128,381 |         |    |

1 08-56-41 - Copy 11-

415

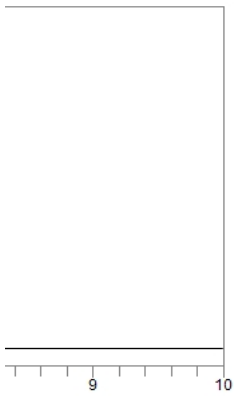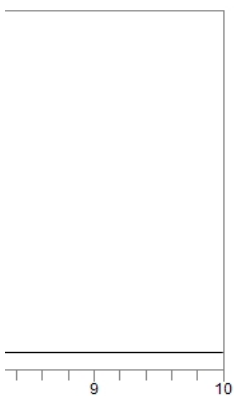

| Final Amount | Units |
|--------------|-------|
|              |       |

|        |       |
|--------|-------|
|        |       |
|        |       |
| 7,2413 | µg/mL |
| 7.2413 |       |



## Sample Report - Multi-Channel

|                       |                                                                 |                  |          |
|-----------------------|-----------------------------------------------------------------|------------------|----------|
| Sample Name           | QC 7.5 ug/mL                                                    |                  |          |
| Batch Group/Name      | UMF Ovidius/20211109 Usnea barbata oil extract - Copy 11-10-202 |                  |          |
| Acquisition Date/Time | 11.9.2021 11:06:39 PM                                           |                  |          |
| Acquisition Method    | 20211103 Usnic Acid Oil                                         |                  |          |
| Processing Method     | 20211103 Usnic Acid Oil                                         |                  |          |
| Instrument Name       | HPLC-PDA Plus                                                   |                  |          |
| Vial Number           | 9                                                               | Injection Number | 5        |
| Operator              | dan.rambu                                                       | Chromera Version | 4.2.0.64 |

QC 7.5 ug/mL : 320:10:400:10 : 5

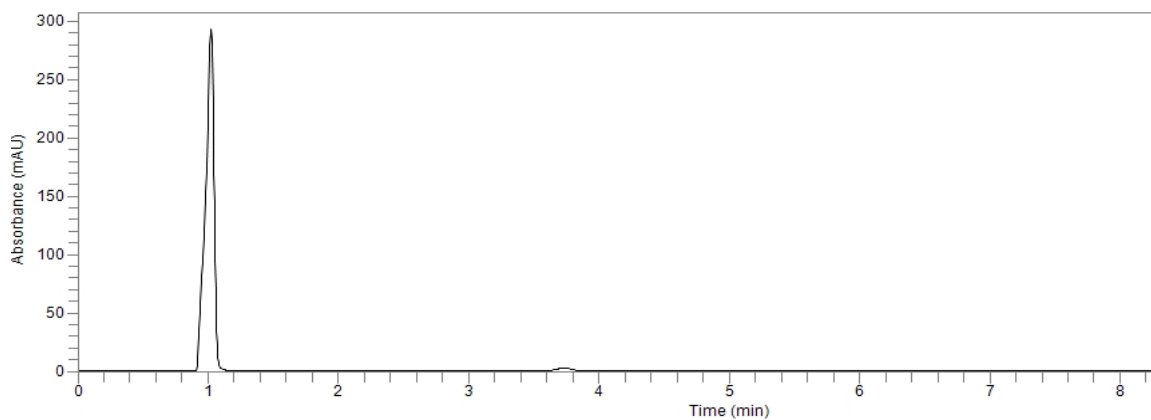

QC 7.5 ug/mL : 282:10:400:10 : 5

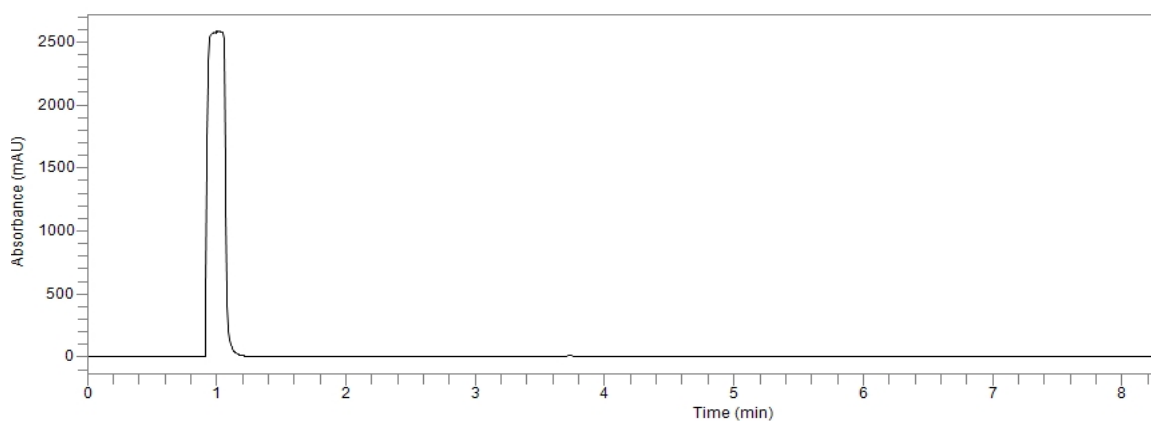

| Peak # | RT (min) | Component Name | Channel       | Area      | Height  | BL |
|--------|----------|----------------|---------------|-----------|---------|----|
| 1      | 1.020    |                | 320:10:400:10 | 1,376,726 | 293,043 | BB |

|              |       |            |               |            |           |    |
|--------------|-------|------------|---------------|------------|-----------|----|
| 1            | 1.021 |            | 282:10:400:10 | 22,656,659 | 2,589,605 | BB |
| 2            | 3.736 | Usnic Acid | 282:10:400:10 | 91,150     | 8,897     | BB |
| 2            | 3.740 |            | 320:10:400:10 | 25,681     | 2,710     | BB |
| <b>Total</b> |       |            |               | 24,150,217 |           |    |

1 08-56-41 - Copy 11-

415

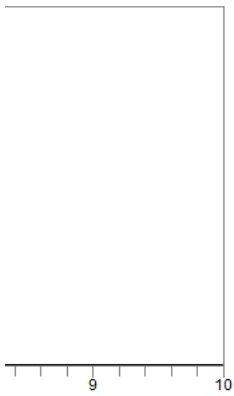

| Final Amount | Units |
|--------------|-------|
|              |       |

|        |       |
|--------|-------|
|        |       |
| 7,1324 | µg/mL |
|        |       |
| 7.1324 |       |

## Sample Report - Multi-Channel

|                       |                                                                 |                  |          |
|-----------------------|-----------------------------------------------------------------|------------------|----------|
| Sample Name           | QC 7.5 ug/mL                                                    |                  |          |
| Batch Group/Name      | UMF Ovidius/20211109 Usnea barbata oil extract - Copy 11-10-202 |                  |          |
| Acquisition Date/Time | 11.9.2021 11:18:20 PM                                           |                  |          |
| Acquisition Method    | 20211103 Usnic Acid Oil                                         |                  |          |
| Processing Method     | 20211103 Usnic Acid Oil                                         |                  |          |
| Instrument Name       | HPLC-PDA Plus                                                   |                  |          |
| Vial Number           | 9                                                               | Injection Number | 6        |
| Operator              | dan.rambu                                                       | Chromera Version | 4.2.0.64 |

QC 7.5 ug/mL : 320:10:400:10 : 6

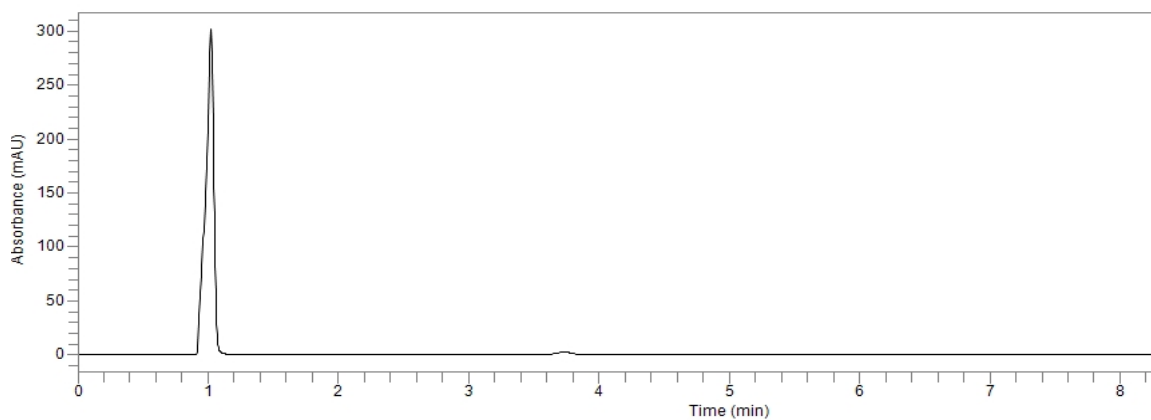

QC 7.5 ug/mL : 282:10:400:10 : 6

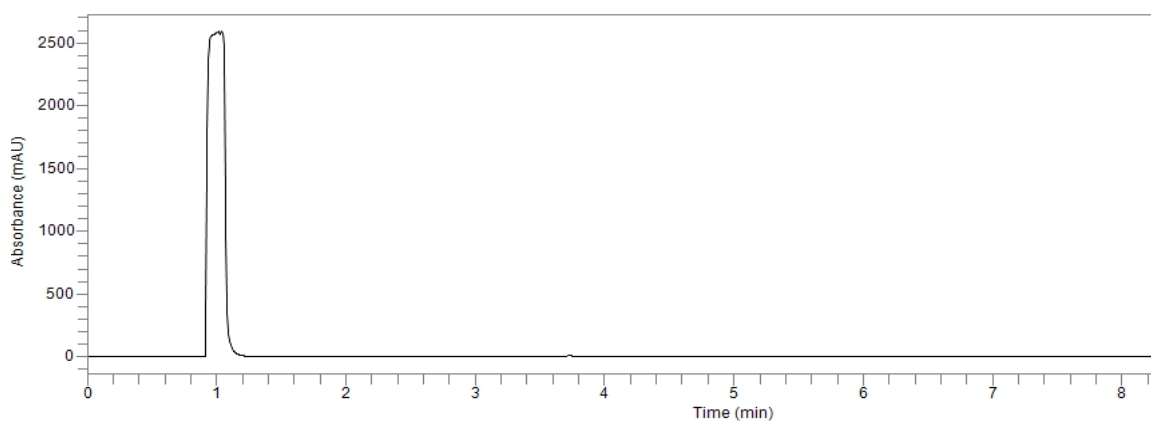

| Peak # | RT (min) | Component Name | Channel       | Area       | Height    | BL |
|--------|----------|----------------|---------------|------------|-----------|----|
| 1      | 1.013    |                | 282:10:400:10 | 22,336,008 | 2,594,293 | BB |

|              |       |            |               |            |         |    |
|--------------|-------|------------|---------------|------------|---------|----|
| 1            | 1.018 |            | 320:10:400:10 | 1,349,530  | 302,955 | BB |
| 2            | 3.732 | Usnic Acid | 282:10:400:10 | 89,034     | 8,775   | BB |
| 2            | 3.734 |            | 320:10:400:10 | 24,395     | 2,653   | BB |
| <b>Total</b> |       |            |               | 23,798,967 |         |    |

1 08-56-41 - Copy 11-

415

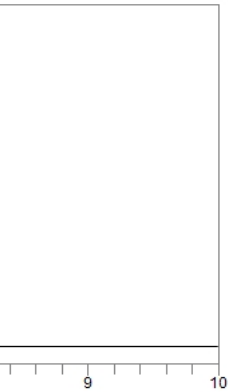

| Final Amount | Units |
|--------------|-------|
|              |       |

|        |       |
|--------|-------|
|        |       |
| 6,9869 | µg/mL |
|        |       |
| 6.9869 |       |



## Sample Report - Multi-Channel

|                       |                                                                 |                  |          |
|-----------------------|-----------------------------------------------------------------|------------------|----------|
| Sample Name           | QC 7.5 ug/mL                                                    |                  |          |
| Batch Group/Name      | UMF Ovidius/20211109 Usnea barbata oil extract - Copy 11-10-202 |                  |          |
| Acquisition Date/Time | 11.9.2021 10:31:36 PM                                           |                  |          |
| Acquisition Method    | 20211103 Usnic Acid Oil                                         |                  |          |
| Processing Method     | 20211103 Usnic Acid Oil                                         |                  |          |
| Instrument Name       | HPLC-PDA Plus                                                   |                  |          |
| Vial Number           | 9                                                               | Injection Number | 2        |
| Operator              | dan.rambu                                                       | Chromera Version | 4.2.0.64 |

QC 7.5 ug/mL : 320:10:400:10 : 2

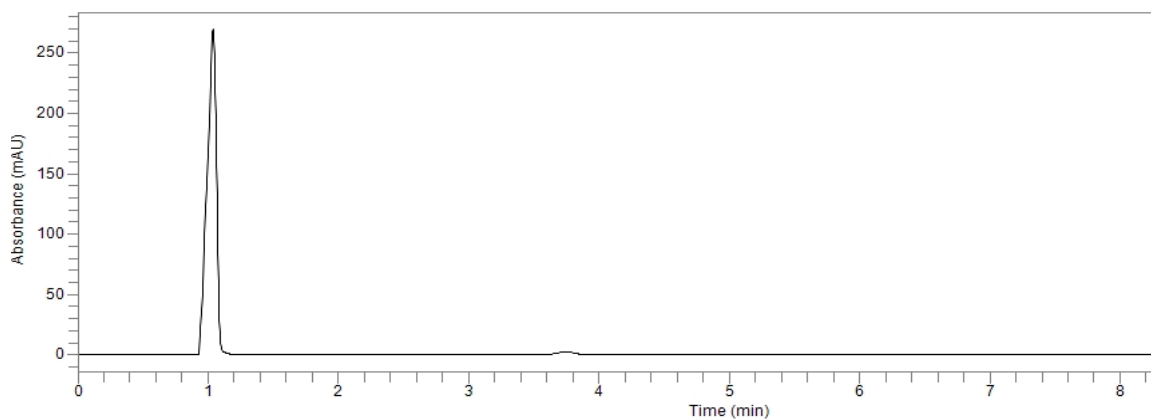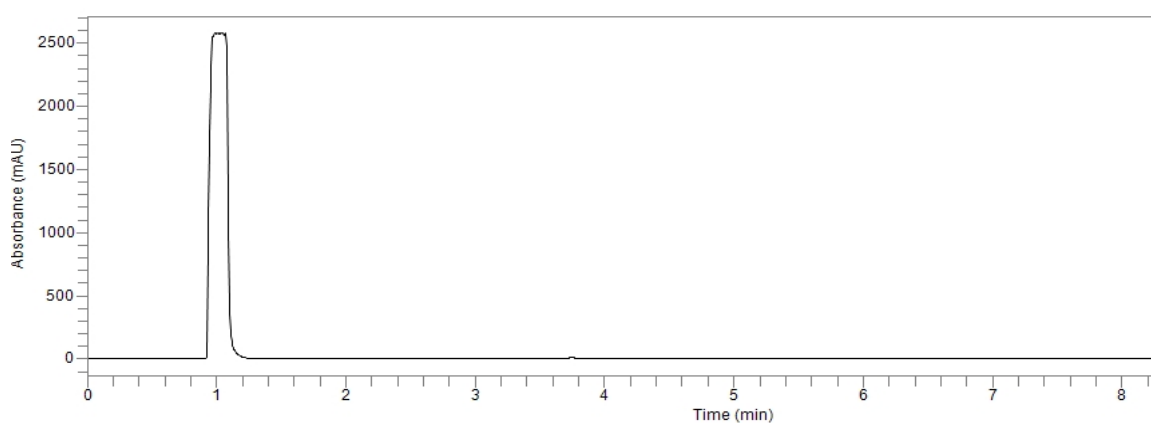

| Peak # | RT (min) | Component Name | Channel       | Area      | Height  | BL |
|--------|----------|----------------|---------------|-----------|---------|----|
| 1      | 1.037    |                | 320:10:400:10 | 1,398,859 | 270,477 | BB |

|              |       |            |               |            |           |    |
|--------------|-------|------------|---------------|------------|-----------|----|
| 1            | 1.042 |            | 282:10:400:10 | 22,904,320 | 2,584,995 | BB |
| 2            | 3.749 | Usnic Acid | 282:10:400:10 | 90,957     | 8,901     | BB |
| 2            | 3.750 |            | 320:10:400:10 | 25,569     | 2,735     | BB |
| <b>Total</b> |       |            |               | 24,419,705 |           |    |

1 08-56-41 - Copy 11-

415

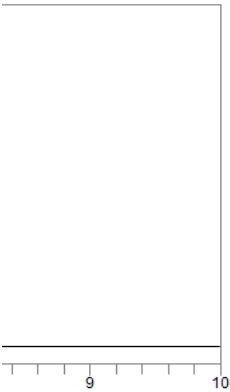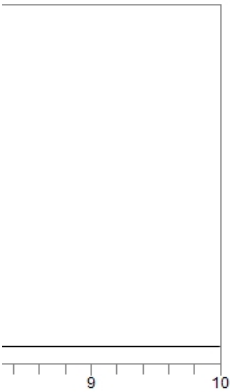

| Final Amount | Units |
|--------------|-------|
|              |       |

|        |       |
|--------|-------|
|        |       |
| 7,1191 | µg/mL |
|        |       |
| 7.1191 |       |

## Sample Report - Multi-Channel

|                       |                                                                 |                  |          |
|-----------------------|-----------------------------------------------------------------|------------------|----------|
| Sample Name           | QC 7.5 ug/mL                                                    |                  |          |
| Batch Group/Name      | UMF Ovidius/20211109 Usnea barbata oil extract - Copy 11-10-202 |                  |          |
| Acquisition Date/Time | 11.9.2021 10:43:17 PM                                           |                  |          |
| Acquisition Method    | 20211103 Usnic Acid Oil                                         |                  |          |
| Processing Method     | 20211103 Usnic Acid Oil                                         |                  |          |
| Instrument Name       | HPLC-PDA Plus                                                   |                  |          |
| Vial Number           | 9                                                               | Injection Number | 3        |
| Operator              | dan.rambu                                                       | Chromera Version | 4.2.0.64 |

QC 7.5 ug/mL : 320:10:400:10 : 3

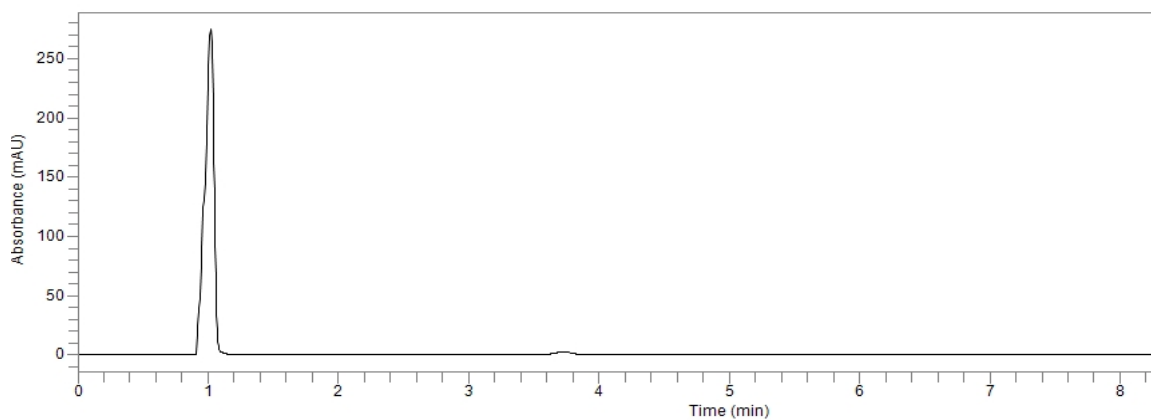

QC 7.5 ug/mL : 282:10:400:10 : 3

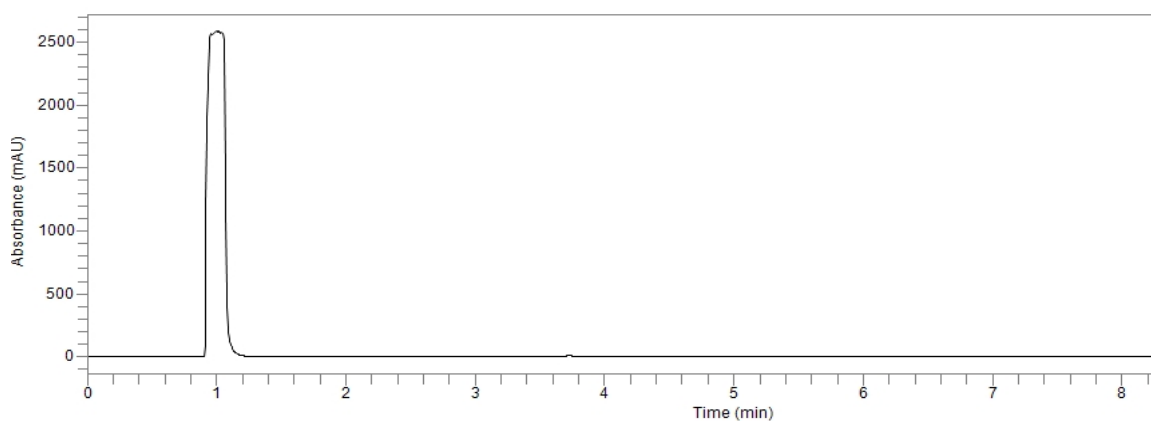

| Peak # | RT (min) | Component Name | Channel       | Area       | Height    | BL |
|--------|----------|----------------|---------------|------------|-----------|----|
| 1      | 1.014    |                | 282:10:400:10 | 23,080,954 | 2,592,497 | BB |

|              |       |            |               |            |         |    |
|--------------|-------|------------|---------------|------------|---------|----|
| 1            | 1.019 |            | 320:10:400:10 | 1,388,632  | 274,288 | BB |
| 2            | 3.729 | Usnic Acid | 282:10:400:10 | 91,862     | 8,883   | BB |
| 2            | 3.731 |            | 320:10:400:10 | 25,149     | 2,701   | BB |
| <b>Total</b> |       |            |               | 24,586,598 |         |    |

1 08-56-41 - Copy 11-

415



| Final Amount | Units |
|--------------|-------|
|              |       |

|        |       |
|--------|-------|
|        |       |
| 7.1813 | µg/mL |
|        |       |
| 7,1813 |       |



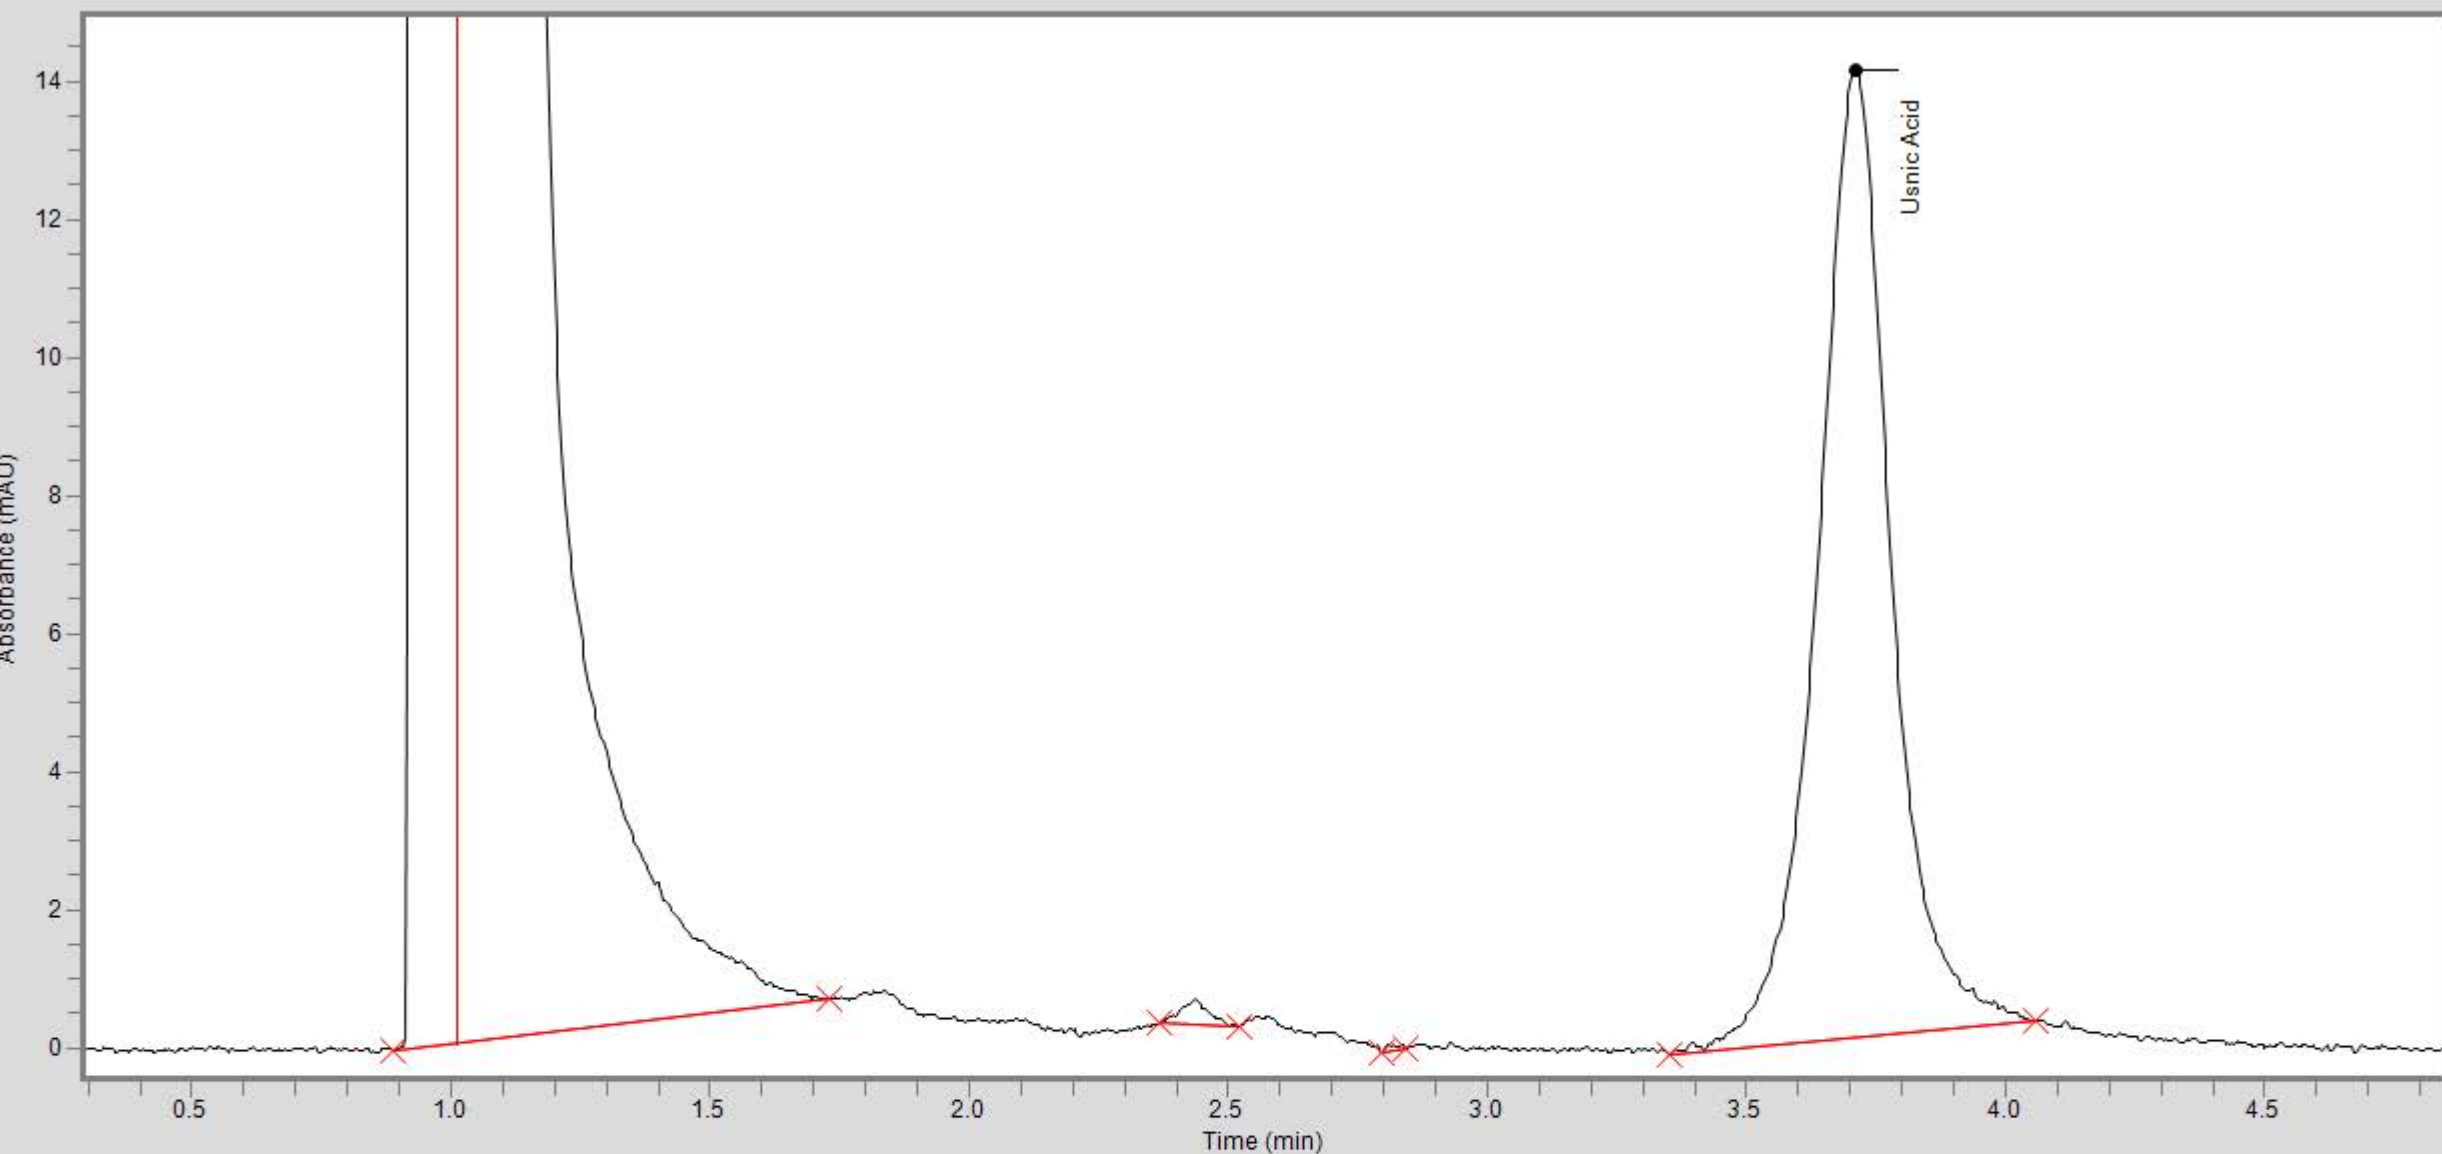

Review Calibration    Apply Calibration    Review Samples    Set 1 of 1

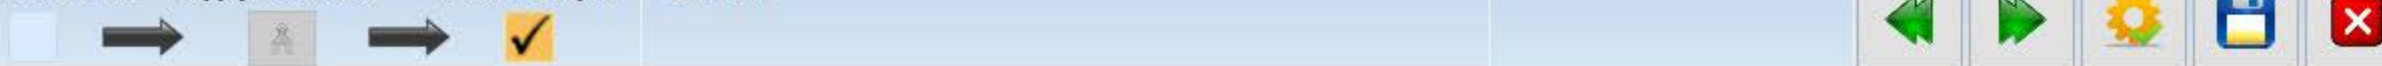

| Channel         | Ret. Time | Component Name | Area        | Height     | Final Amount | Final Amount Units | Peak Purity | Peak Purity Details |
|-----------------|-----------|----------------|-------------|------------|--------------|--------------------|-------------|---------------------|
| 320:10:400:10   | 3.711     |                | 33108.92    | 3996.22    |              |                    | 9.71        | Fail                |
| 320:10:400:10   | 4.639     |                | 70.02       | 79.31      |              |                    | 4.19        | Fail                |
| 320:10:400:10   | 9.370     |                | 184.77      | 129.88     |              |                    | 9.89        | Fail                |
| ▶ 282:10:400:10 | 0.984     |                | 12993000.56 | 2588509.11 |              |                    |             |                     |
| 282:10:400:10   | 1.036     |                | 10069460.86 | 2606439.88 |              |                    |             |                     |
| 282:10:400:10   | 2.437     |                | 1399.10     | 364.72     |              |                    |             |                     |
| 282:10:400:10   | 2.833     |                | 161.59      | 68.28      |              |                    |             |                     |
| 282:10:400:10   | 3.394     |                | 245.92      | 145.89     |              |                    |             |                     |
| 282:10:400:10   | 3.711     | Usnic Acid     | 138527.18   | 14029.27   | 10.388648    | µg/mL              |             |                     |
| 282:10:400:10   | 6.487     |                | 383.77      | 144.12     |              |                    |             |                     |

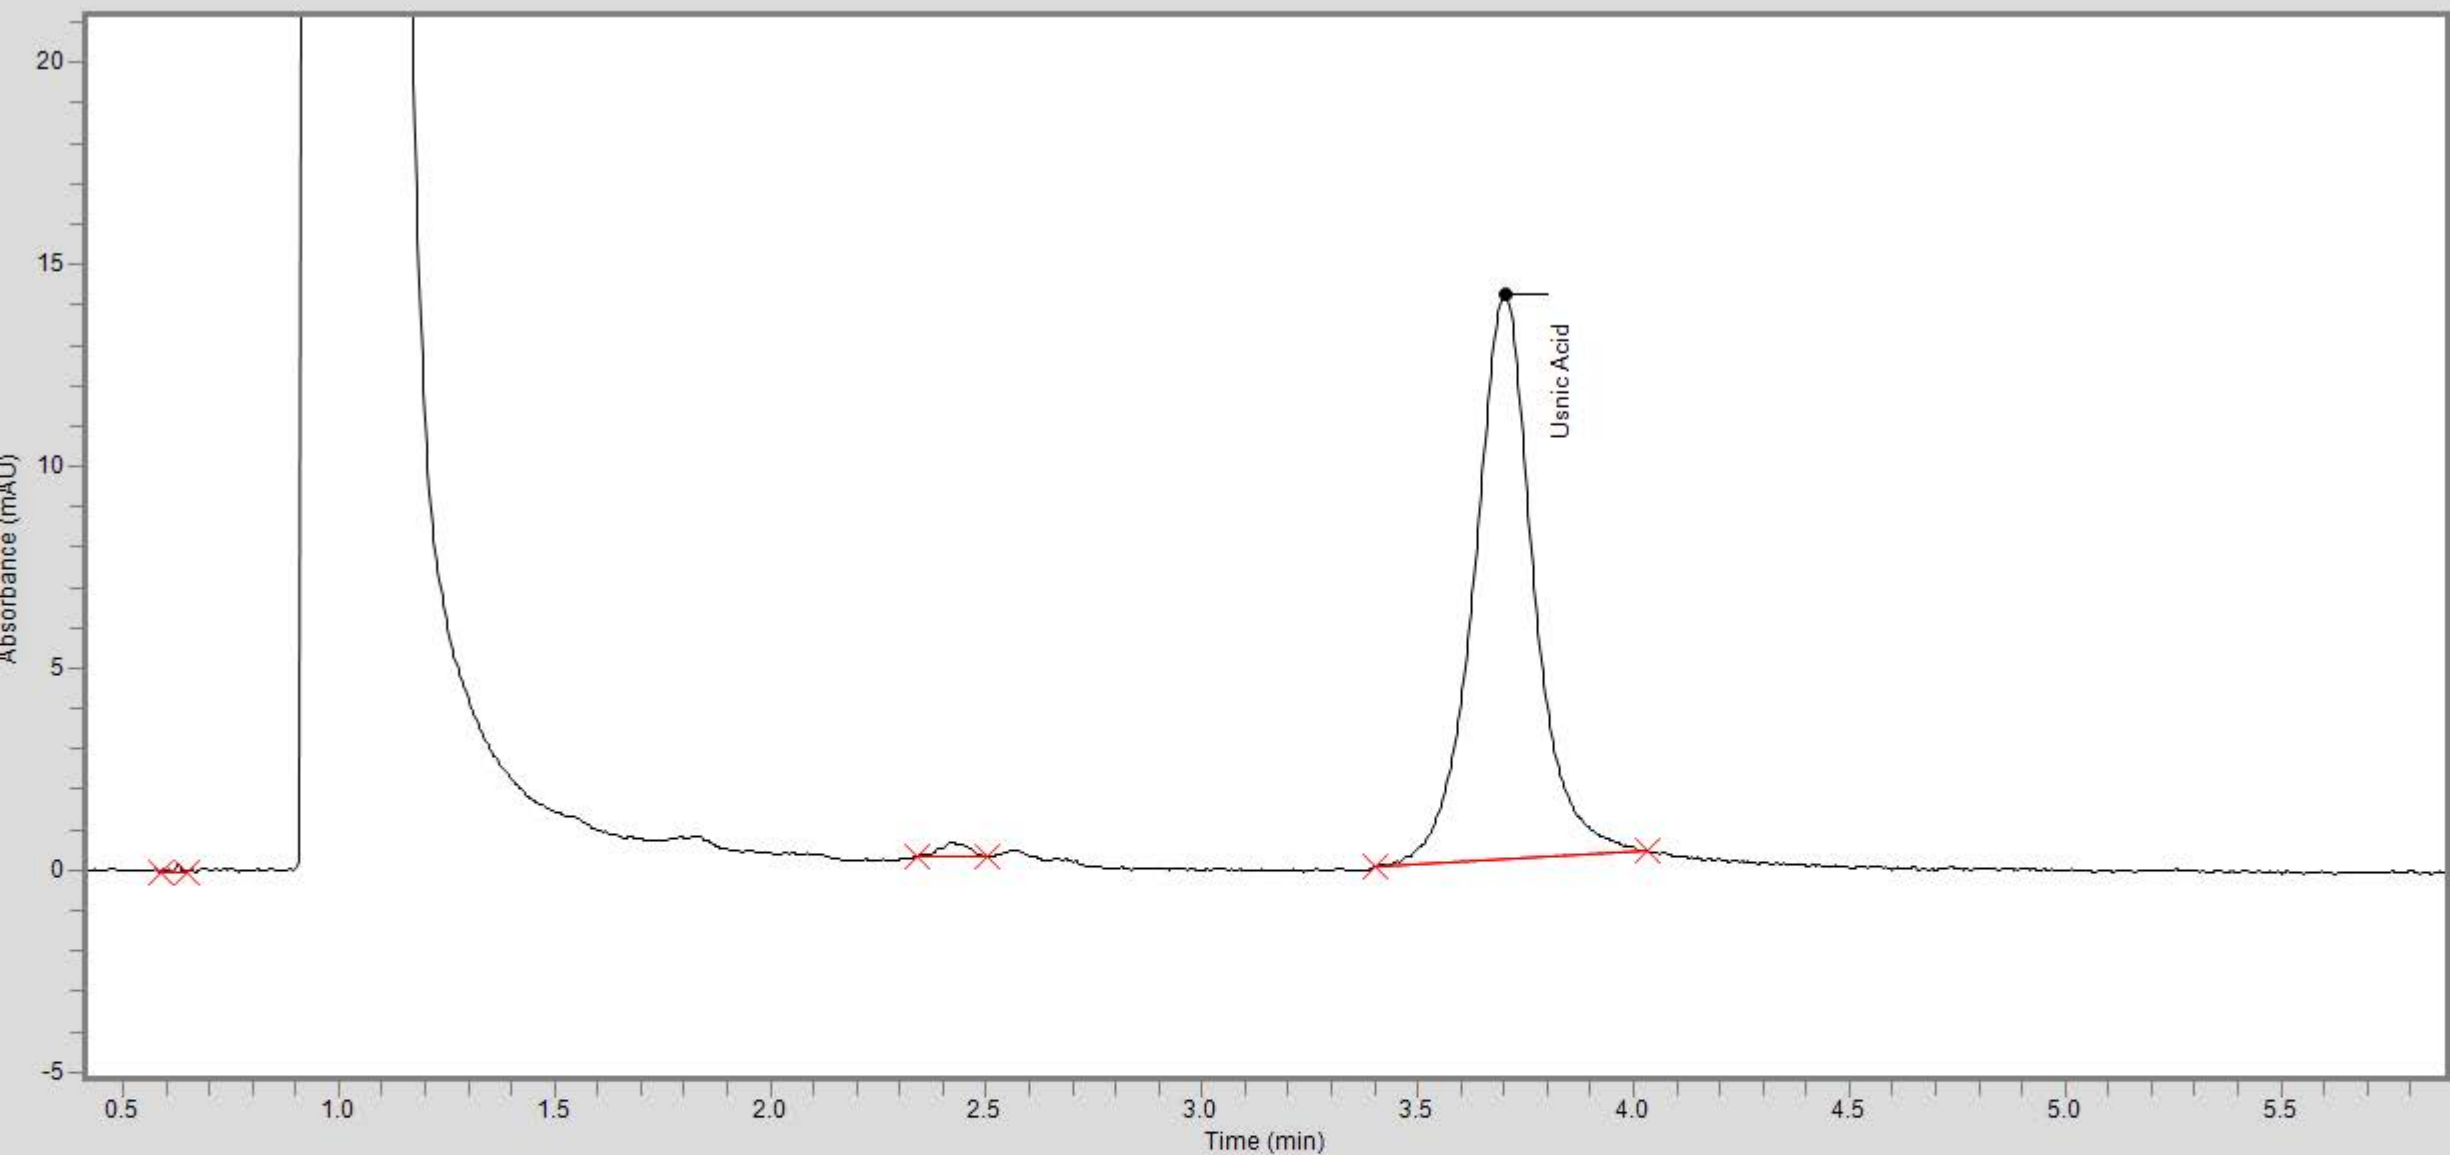

Review Calibration    Apply Calibration    Review Samples    Set 1 of 1

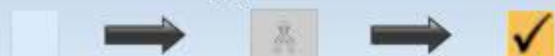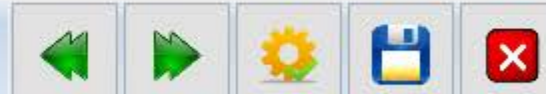

|   | Channel       | Ret. Time | Component Name | Area       | Height     | Final Amount | Final Amount Units | Peak Purity | Peak Purity Details |
|---|---------------|-----------|----------------|------------|------------|--------------|--------------------|-------------|---------------------|
|   | 320:10:400:10 | 3.702     |                | 44681.23   | 4428.70    |              |                    |             | Not Enough Valid P  |
| ▶ | 282:10:400:10 | 0.629     |                | 189.87     | 164.33     |              |                    |             |                     |
|   | 282:10:400:10 | 0.957     |                | 4095359.46 | 1500449.48 |              |                    |             |                     |
|   | 282:10:400:10 | 1.015     |                | 2130558.60 | 130531.90  |              |                    |             |                     |
|   | 282:10:400:10 | 1.028     |                | 2240091.40 | 305207.55  |              |                    |             |                     |
|   | 282:10:400:10 | 2.420     |                | 1524.75    | 338.90     |              |                    |             |                     |
|   | 282:10:400:10 | 3.702     | Usnic Acid     | 134820.42  | 13996.50   | 10.133877    | µg/mL              |             |                     |
|   | 282:10:400:10 | 9.103     |                | 83.57      | 120.06     |              |                    |             |                     |

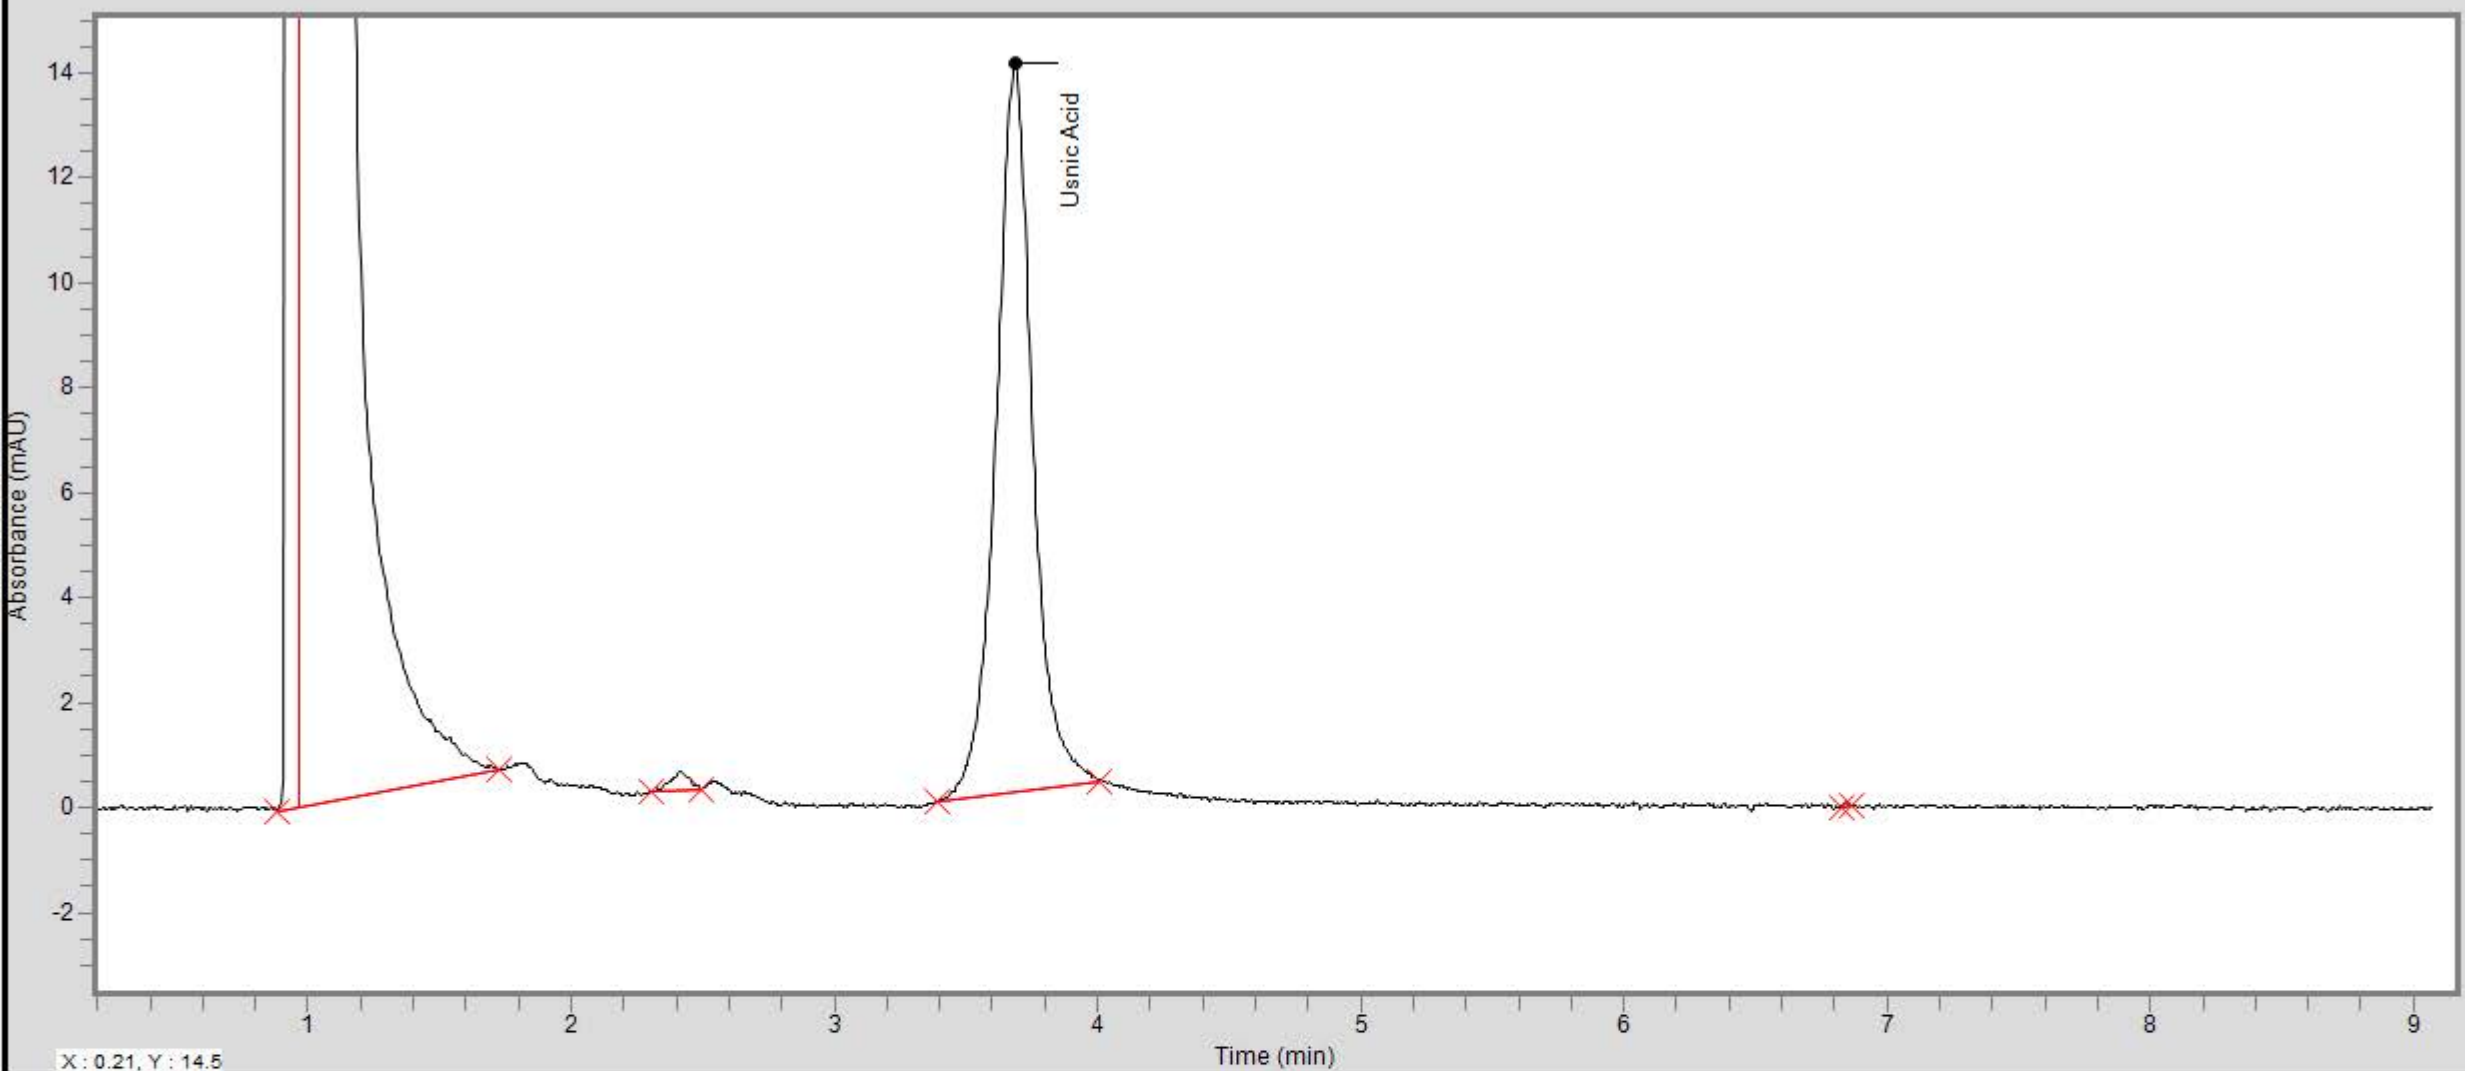

X: 0.21, Y: 14.5

Time (min)

### Review Calibration

### Apply Calibration

## Review Samples

Set 1 of 1

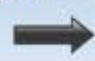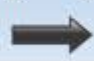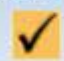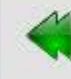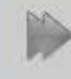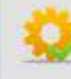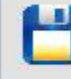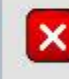

|                                                                                   | Sample Name | Sample Description | Injection Number |
|-----------------------------------------------------------------------------------|-------------|--------------------|------------------|
|  | UA 10ug rec |                    | 1                |
|  | UA 10ug rec |                    | 2                |
|  | UA 10ug rec |                    | 3                |

| Channel       | Ret. Time | Component Name | Area        | Height     | Final Amount | Final Amount Units | Peak Purity | Peak Purity Details |
|---------------|-----------|----------------|-------------|------------|--------------|--------------------|-------------|---------------------|
| 320:10:400:10 | 1.016     |                | 1404099.51  | 302454.87  |              |                    | 1.61        | Fail                |
| 320:10:400:10 | 3.686     |                | 43817.85    | 4358.06    |              |                    |             | Not Enough Valid P  |
| 282:10:400:10 | 0.952     |                | 7210978.79  | 2572132.55 |              |                    |             |                     |
| 282:10:400:10 | 0.984     |                | 15581249.54 | 2599777.43 |              |                    |             |                     |
| 282:10:400:10 | 2.420     |                | 1764.61     | 356.50     |              |                    |             |                     |
| 282:10:400:10 | 3.685     | Usnic Acid     | 133733.29   | 13857.79   | 10.059157    | µg/mL              |             |                     |
| 282:10:400:10 | 6.842     |                | 135.30      | 111.11     |              |                    |             |                     |

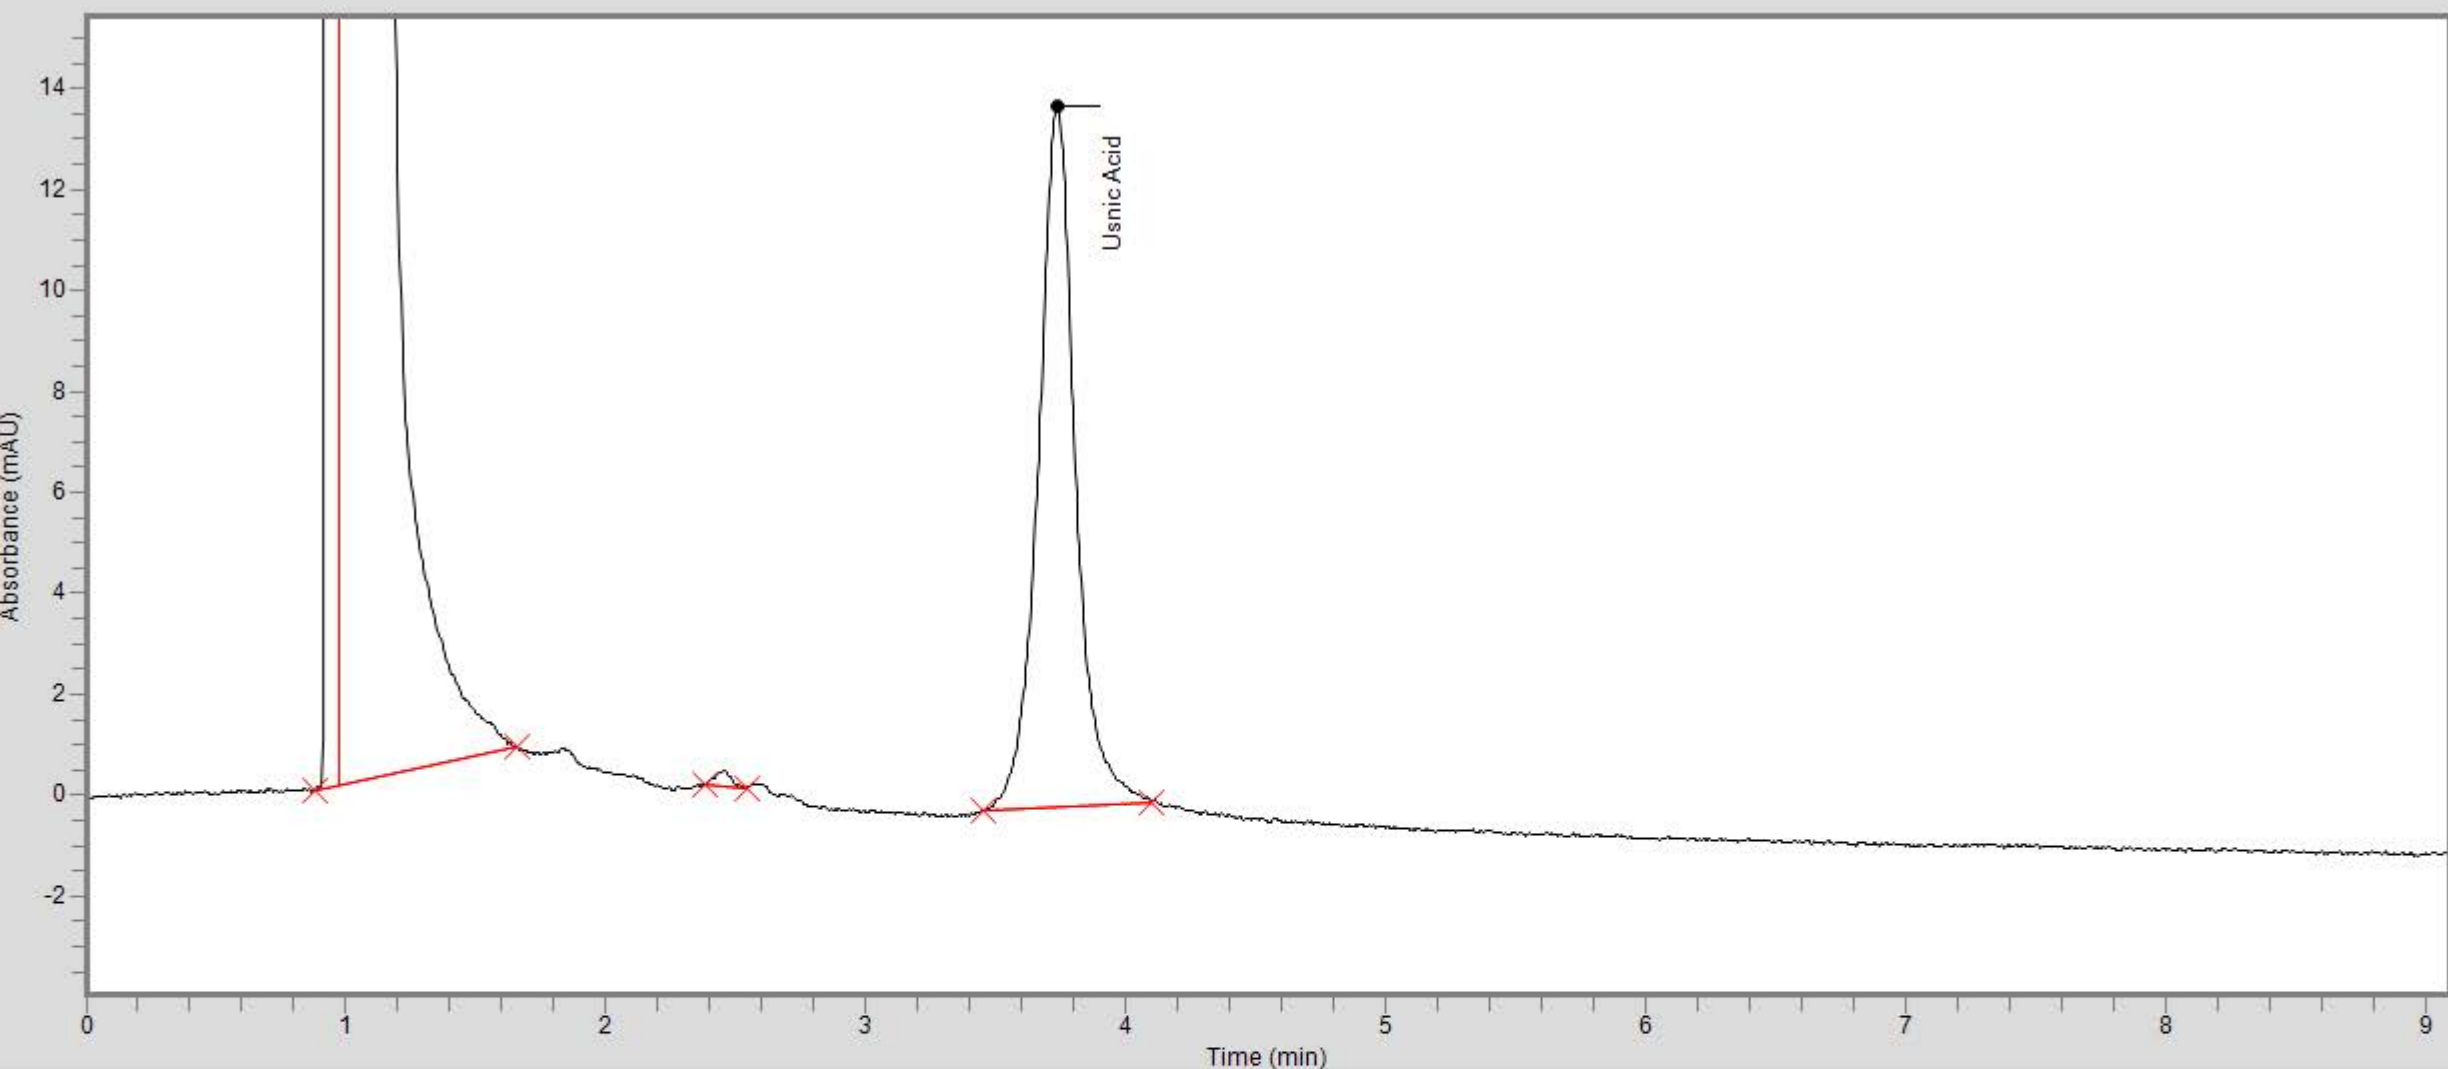

Review Calibration    Apply Calibration    Review Samples    Set 1 of 1

Navigation icons: Back, Forward, Settings, Save, Close.

| Sample Name   |           |                | Sample Description |             |            | Injection Number |                    |             |                     |
|---------------|-----------|----------------|--------------------|-------------|------------|------------------|--------------------|-------------|---------------------|
| UA 10ug rec   |           |                |                    |             |            | 1                |                    |             |                     |
| Channel       | Ret. Time | Component Name |                    | Area        | Height     | Final Amount     | Final Amount Units | Peak Purity | Peak Purity Details |
| 320:10:400:10 | 1.028     |                |                    | 1328173.39  | 271241.57  |                  |                    | 1.46        | Pass                |
| 320:10:400:10 | 3.737     |                |                    | 37186.60    | 4141.71    |                  |                    |             | Not Enough Valid P  |
| 320:10:400:10 | 4.499     |                |                    | 52.04       | 72.01      |                  |                    | 9.96        | Fail                |
| 320:10:400:10 | 6.025     |                |                    | 58.49       | 65.68      |                  |                    | 6.62        | Fail                |
| 320:10:400:10 | 6.697     |                |                    | 38.45       | 46.47      |                  |                    |             | Not Enough Valid P  |
| 282:10:400:10 | 0.965     |                |                    | 7297121.88  | 2572304.03 |                  |                    |             |                     |
| 282:10:400:10 | 1.023     |                |                    | 16013333.66 | 2596999.90 |                  |                    |             |                     |
| 282:10:400:10 | 2.457     |                |                    | 1315.69     | 308.15     |                  |                    |             |                     |
| 282:10:400:10 | 3.734     | Usnic Acid     |                    | 137647.59   | 13889.07   | 10.328192        | µg/mL              |             |                     |
