# Supplementary material for: Antioxidant, Cytotoxic, and Rheological Properties of Canola Oil Extract of Usnea barbata (L.) Weber ex F.H. Wigg from Călimani Mountains, Romania
Source: MDPI journal article supplement (doi:10.3390/plants11070854), 2022-03-23
Supplement: s1 [file s1]

# Sample Report - Multi-Channel

Sample Name QC 7.5 ug/mL  
 Batch Group/Name UMF Ovidius/20211109 Usnea barbata oil extract - Copy 11-10-202  
 Acquisition Date/Time 11.9.2021 10:19:54 PM  
 Acquisition Method 20211103 Usnic Acid Oil  
 Processing Method 20211103 Usnic Acid Oil  
 Instrument Name HPLC-PDA Plus  
 Vial Number 9  
 Operator dan.rambu  
 Injection Number 1  
 Chromera Version 4.2.0.64

QC 7.5 ug/mL : 320:10:400:10 : 1

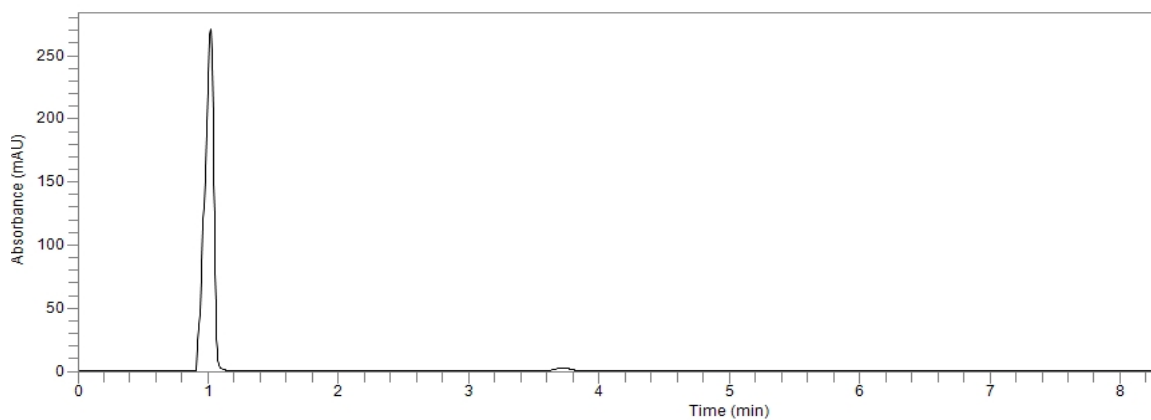

QC 7.5 ug/mL : 282:10:400:10 : 1

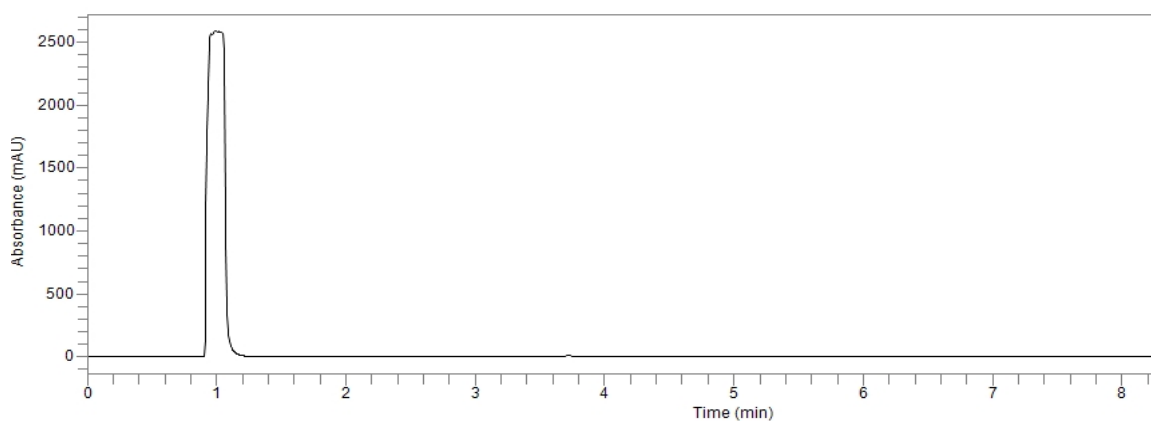

| Peak # | RT (min) | Component Name | Channel       | Area       | Height    | BL |
|--------|----------|----------------|---------------|------------|-----------|----|
| 1      | 0.997    |                | 282:10:400:10 | 22,677,961 | 2,590,940 | BB |

|              |       |            |               |            |         |    |
|--------------|-------|------------|---------------|------------|---------|----|
| 1            | 1.016 |            | 320:10:400:10 | 1,344,208  | 271,096 | BB |
| 2            | 3.723 | Usnic Acid | 282:10:400:10 | 88,436     | 8,764   | BB |
| 2            | 3.724 |            | 320:10:400:10 | 24,739     | 2,682   | BB |
| <b>Total</b> |       |            |               | 24,135,343 |         |    |

1 08-56-41 - Copy 11-

415

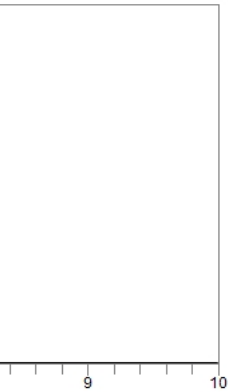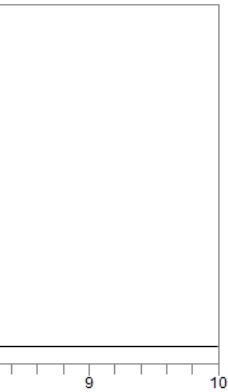

| Final Amount | Units |
|--------------|-------|
|              |       |

|        |       |
|--------|-------|
|        |       |
| 6.9458 | µg/mL |
|        |       |
| 6.9458 |       |

# Sample Report - Multi-Channel

Sample Name QC 7.5 ug/mL  
 Batch Group/Name UMF Ovidius/20211109 Usnea barbata oil extract - Copy 11-10-202  
 Acquisition Date/Time 11.9.2021 10:54:58 PM  
 Acquisition Method 20211103 Usnic Acid Oil  
 Processing Method 20211103 Usnic Acid Oil  
 Instrument Name HPLC-PDA Plus  
 Vial Number 9  
 Operator dan.rambu  
 Injection Number 4  
 Chromera Version 4.2.0.64

QC 7.5 ug/mL : 320:10:400:10 : 4

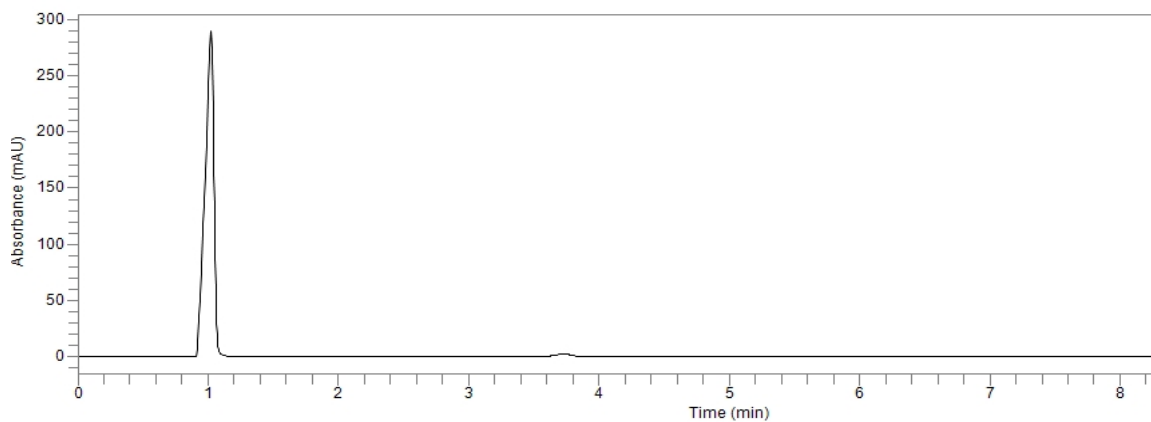

QC 7.5 ug/mL : 282:10:400:10 : 4

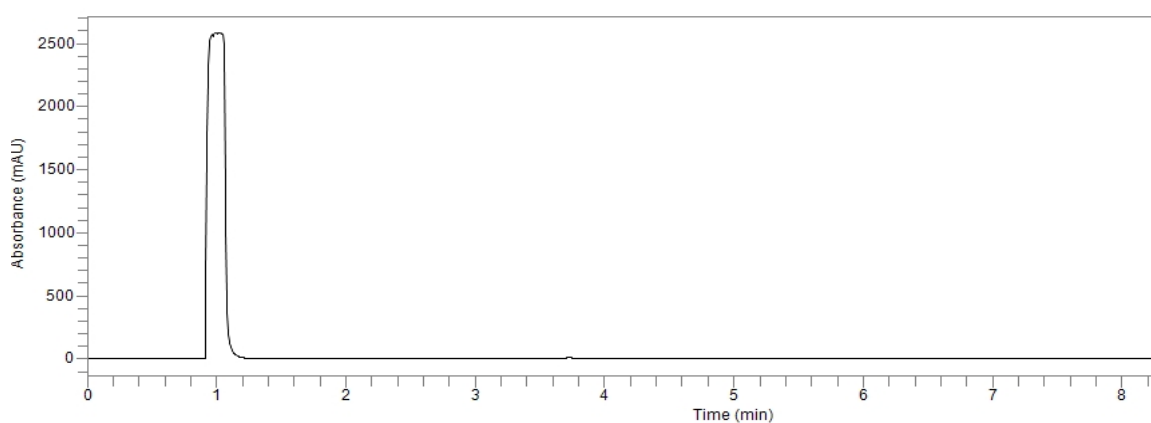

| Peak # | RT (min) | Component Name | Channel       | Area       | Height    | BL |
|--------|----------|----------------|---------------|------------|-----------|----|
| 1      | 0.995    |                | 282:10:400:10 | 22,603,492 | 2,585,938 | BB |

|              |       |            |               |            |         |    |
|--------------|-------|------------|---------------|------------|---------|----|
| 1            | 1.019 |            | 320:10:400:10 | 1,405,142  | 290,302 | BB |
| 2            | 3.727 |            | 320:10:400:10 | 27,012     | 2,765   | BB |
| 2            | 3.728 | Usnic Acid | 282:10:400:10 | 92,735     | 8,982   | BB |
| <b>Total</b> |       |            |               | 24,128,381 |         |    |

1 08-56-41 - Copy 11-

415

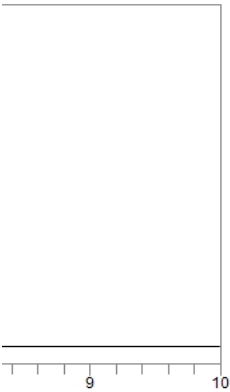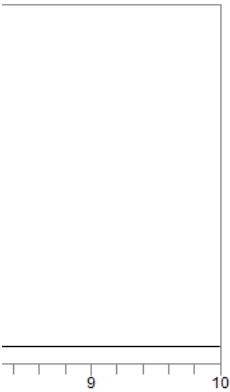

| Final Amount | Units |
|--------------|-------|
|              |       |

|        |       |
|--------|-------|
|        |       |
|        |       |
| 7.2413 | µg/mL |
| 7.2413 |       |



## Sample Report - Multi-Channel

|                       |                                                                 |                  |          |
|-----------------------|-----------------------------------------------------------------|------------------|----------|
| Sample Name           | QC 7.5 ug/mL                                                    |                  |          |
| Batch Group/Name      | UMF Ovidius/20211109 Usnea barbata oil extract - Copy 11-10-202 |                  |          |
| Acquisition Date/Time | 11.9.2021 11:06:39 PM                                           |                  |          |
| Acquisition Method    | 20211103 Usnic Acid Oil                                         |                  |          |
| Processing Method     | 20211103 Usnic Acid Oil                                         |                  |          |
| Instrument Name       | HPLC-PDA Plus                                                   |                  |          |
| Vial Number           | 9                                                               | Injection Number | 5        |
| Operator              | dan.rambu                                                       | Chromera Version | 4.2.0.64 |

QC 7.5 ug/mL : 320:10:400:10 : 5

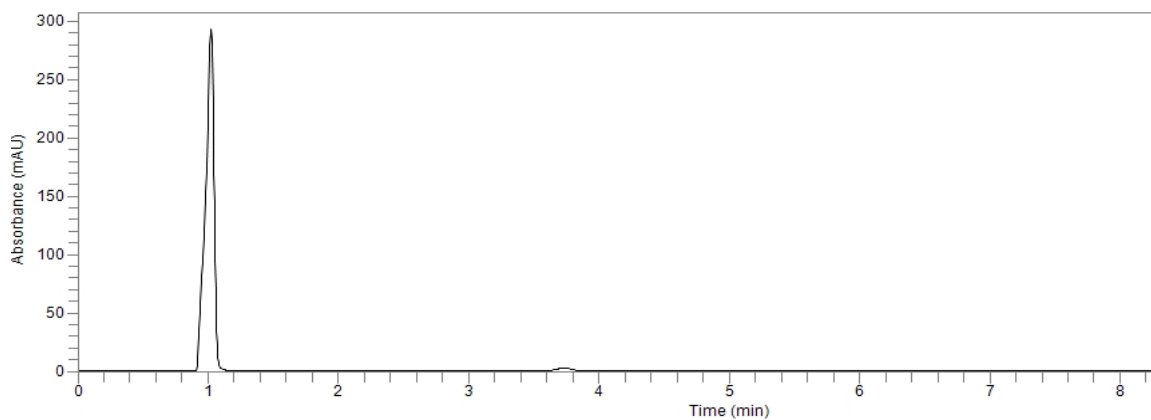

QC 7.5 ug/mL : 282:10:400:10 : 5

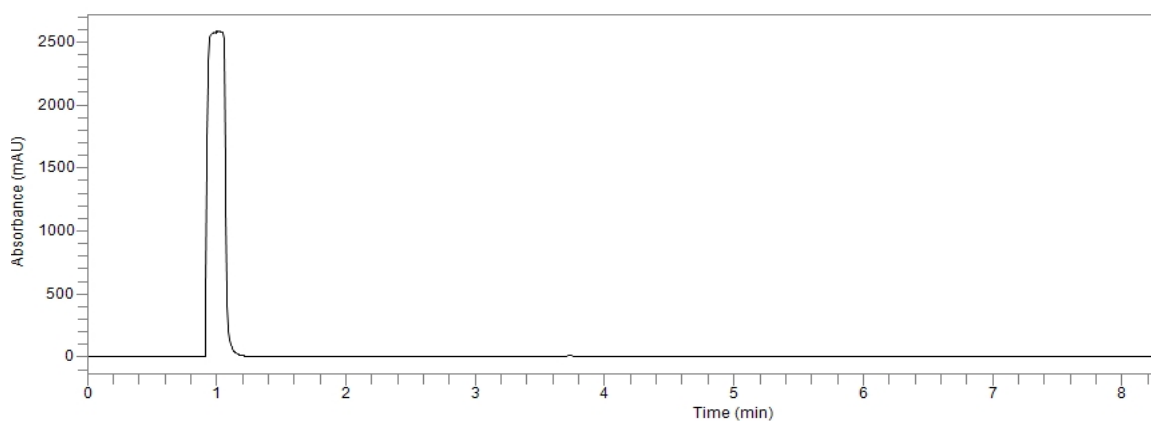

| Peak # | RT (min) | Component Name | Channel       | Area      | Height  | BL |
|--------|----------|----------------|---------------|-----------|---------|----|
| 1      | 1.020    |                | 320:10:400:10 | 1,376,726 | 293,043 | BB |

|              |       |            |               |            |           |    |
|--------------|-------|------------|---------------|------------|-----------|----|
| 1            | 1.021 |            | 282:10:400:10 | 22,656,659 | 2,589,605 | BB |
| 2            | 3.736 | Usnic Acid | 282:10:400:10 | 91,150     | 8,897     | BB |
| 2            | 3.740 |            | 320:10:400:10 | 25,681     | 2,710     | BB |
| <b>Total</b> |       |            |               | 24,150,217 |           |    |

1 08-56-41 - Copy 11-

415



| Final Amount | Units |
|--------------|-------|
|              |       |

|        |       |
|--------|-------|
|        |       |
| 7.1324 | µg/mL |
|        |       |
| 7.1324 |       |

## Sample Report - Multi-Channel

|                       |                                                                 |                  |          |
|-----------------------|-----------------------------------------------------------------|------------------|----------|
| Sample Name           | QC 7.5 ug/mL                                                    |                  |          |
| Batch Group/Name      | UMF Ovidius/20211109 Usnea barbata oil extract - Copy 11-10-202 |                  |          |
| Acquisition Date/Time | 11.9.2021 11:18:20 PM                                           |                  |          |
| Acquisition Method    | 20211103 Usnic Acid Oil                                         |                  |          |
| Processing Method     | 20211103 Usnic Acid Oil                                         |                  |          |
| Instrument Name       | HPLC-PDA Plus                                                   |                  |          |
| Vial Number           | 9                                                               | Injection Number | 6        |
| Operator              | dan.rambu                                                       | Chromera Version | 4.2.0.64 |

QC 7.5 ug/mL : 320:10:400:10 : 6

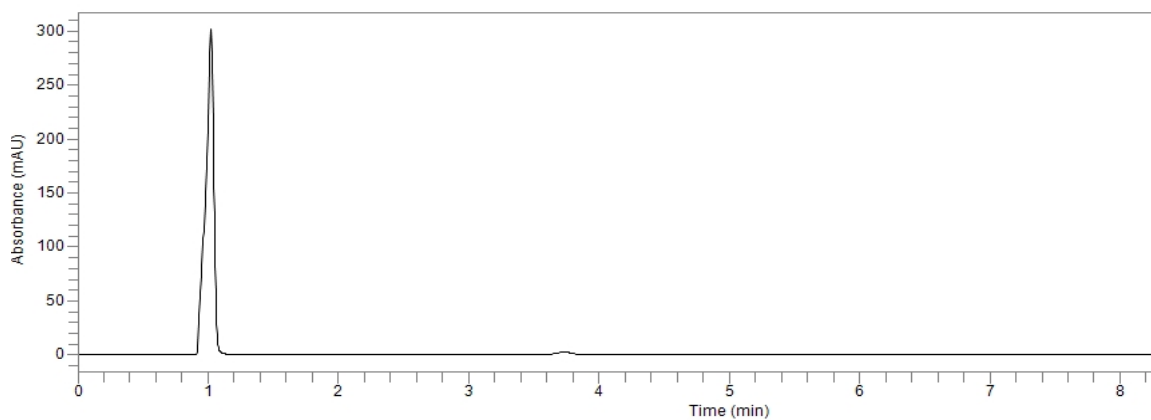

QC 7.5 ug/mL : 282:10:400:10 : 6

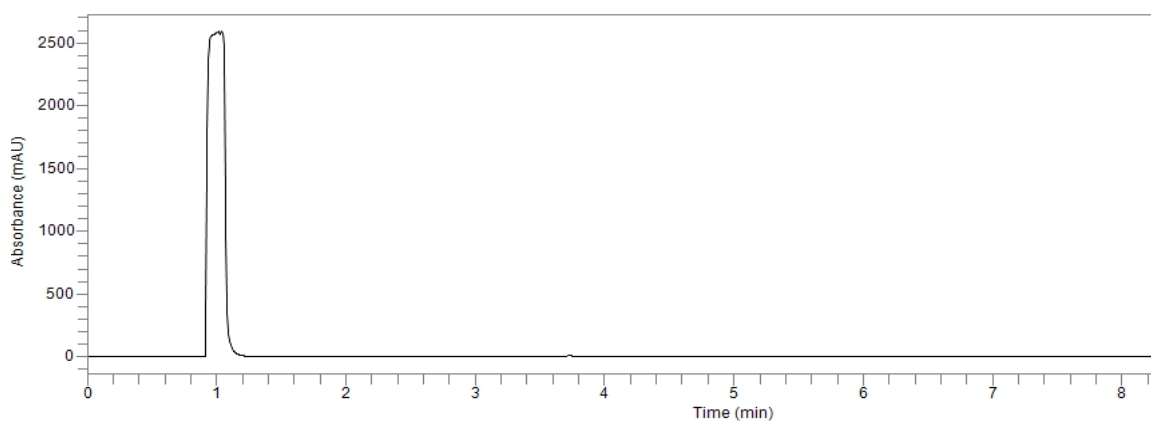

| Peak # | RT (min) | Component Name | Channel       | Area       | Height    | BL |
|--------|----------|----------------|---------------|------------|-----------|----|
| 1      | 1.013    |                | 282:10:400:10 | 22,336,008 | 2,594,293 | BB |

|              |       |            |               |            |         |    |
|--------------|-------|------------|---------------|------------|---------|----|
| 1            | 1.018 |            | 320:10:400:10 | 1,349,530  | 302,955 | BB |
| 2            | 3.732 | Usnic Acid | 282:10:400:10 | 89,034     | 8,775   | BB |
| 2            | 3.734 |            | 320:10:400:10 | 24,395     | 2,653   | BB |
| <b>Total</b> |       |            |               | 23,798,967 |         |    |

1 08-56-41 - Copy 11-

415

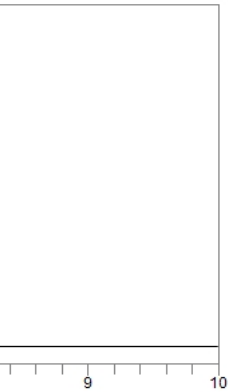

| Final Amount | Units |
|--------------|-------|
|              |       |

|        |       |
|--------|-------|
|        |       |
| 6.9869 | µg/mL |
|        |       |
| 6.9869 |       |



# Sample Report - Multi-Channel

Sample Name QC 7.5 ug/mL  
 Batch Group/Name UMF Ovidius/20211109 Usnea barbata oil extract - Copy 11-10-202  
 Acquisition Date/Time 11.9.2021 10:31:36 PM  
 Acquisition Method 20211103 Usnic Acid Oil  
 Processing Method 20211103 Usnic Acid Oil  
 Instrument Name HPLC-PDA Plus  
 Vial Number 9  
 Operator dan.rambu  
 Injection Number 2  
 Chromera Version 4.2.0.64

QC 7.5 ug/mL : 320:10:400:10 : 2

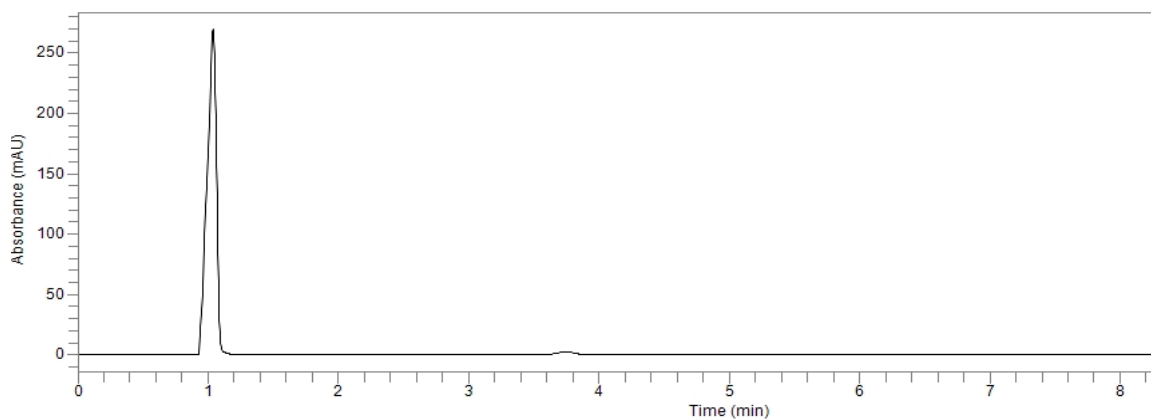

QC 7.5 ug/mL : 282:10:400:10 : 2

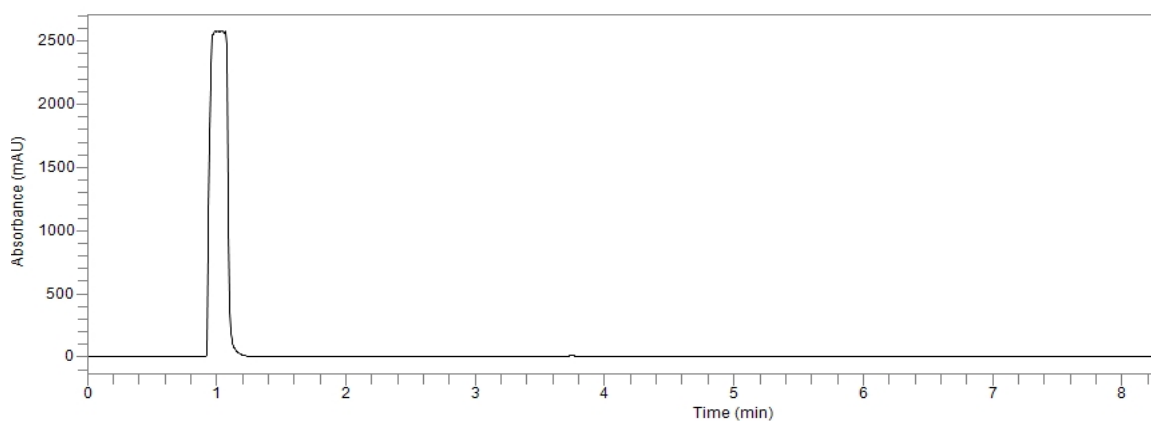

| Peak # | RT (min) | Component Name | Channel       | Area      | Height  | BL |
|--------|----------|----------------|---------------|-----------|---------|----|
| 1      | 1.037    |                | 320:10:400:10 | 1,398,859 | 270,477 | BB |

|              |       |            |               |            |           |    |
|--------------|-------|------------|---------------|------------|-----------|----|
| 1            | 1.042 |            | 282:10:400:10 | 22,904,320 | 2,584,995 | BB |
| 2            | 3.749 | Usnic Acid | 282:10:400:10 | 90,957     | 8,901     | BB |
| 2            | 3.750 |            | 320:10:400:10 | 25,569     | 2,735     | BB |
| <b>Total</b> |       |            |               | 24,419,705 |           |    |

1 08-56-41 - Copy 11-

415



| Final Amount | Units |
|--------------|-------|
|              |       |

|        |       |
|--------|-------|
|        |       |
| 7.1191 | µg/mL |
|        |       |
| 7.1191 |       |

## Sample Report - Multi-Channel

|                       |                                                                 |                  |          |
|-----------------------|-----------------------------------------------------------------|------------------|----------|
| Sample Name           | QC 7.5 ug/mL                                                    |                  |          |
| Batch Group/Name      | UMF Ovidius/20211109 Usnea barbata oil extract - Copy 11-10-202 |                  |          |
| Acquisition Date/Time | 11.9.2021 10:43:17 PM                                           |                  |          |
| Acquisition Method    | 20211103 Usnic Acid Oil                                         |                  |          |
| Processing Method     | 20211103 Usnic Acid Oil                                         |                  |          |
| Instrument Name       | HPLC-PDA Plus                                                   |                  |          |
| Vial Number           | 9                                                               | Injection Number | 3        |
| Operator              | dan.rambu                                                       | Chromera Version | 4.2.0.64 |

QC 7.5 ug/mL : 320:10:400:10 : 3

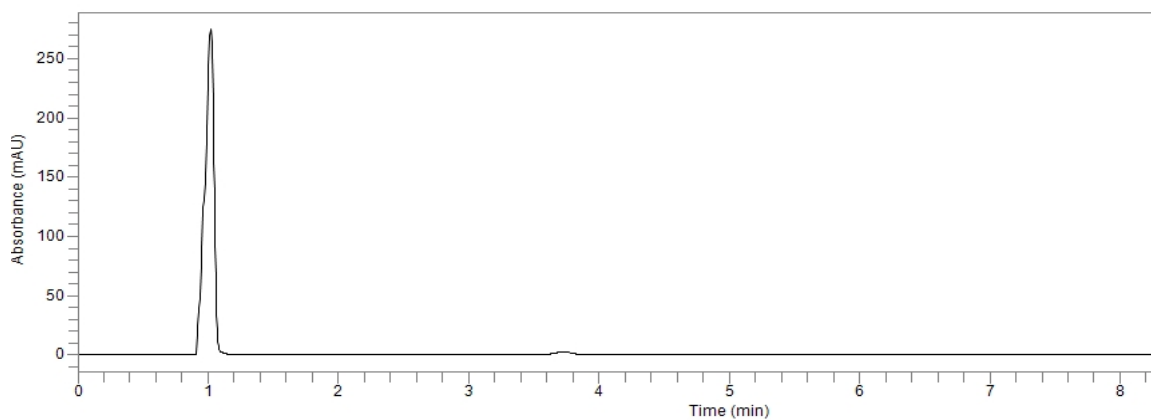

QC 7.5 ug/mL : 282:10:400:10 : 3

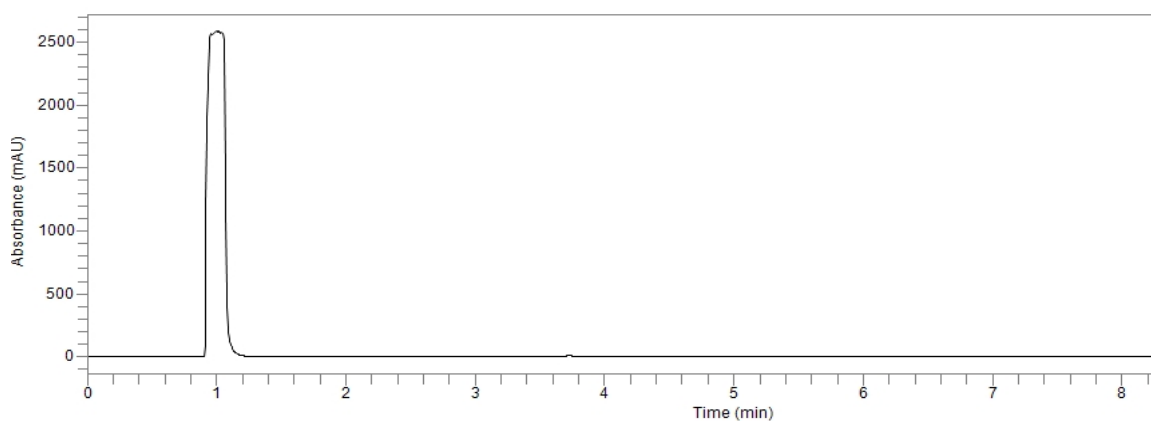

| Peak # | RT (min) | Component Name | Channel       | Area       | Height    | BL |
|--------|----------|----------------|---------------|------------|-----------|----|
| 1      | 1.014    |                | 282:10:400:10 | 23,080,954 | 2,592,497 | BB |

|              |       |            |               |            |         |    |
|--------------|-------|------------|---------------|------------|---------|----|
| 1            | 1.019 |            | 320:10:400:10 | 1,388,632  | 274,288 | BB |
| 2            | 3.729 | Usnic Acid | 282:10:400:10 | 91,862     | 8,883   | BB |
| 2            | 3.731 |            | 320:10:400:10 | 25,149     | 2,701   | BB |
| <b>Total</b> |       |            |               | 24,586,598 |         |    |

1 08-56-41 - Copy 11-

415



| Final Amount | Units |
|--------------|-------|
|              |       |

|        |       |
|--------|-------|
|        |       |
| 7.1813 | µg/mL |
|        |       |
| 7.1813 |       |



## Sample Report - Multi-Channel

|                       |                                                                 |                  |          |
|-----------------------|-----------------------------------------------------------------|------------------|----------|
| Sample Name           | UBO 10 mg/ML                                                    |                  |          |
| Batch Group/Name      | UMF Ovidius/20211109 Usnea barbata oil extract - Copy 11-10-202 |                  |          |
| Acquisition Date/Time | 11.9.2021 11:30:01 PM                                           |                  |          |
| Acquisition Method    | 20211103 Usnic Acid Oil                                         |                  |          |
| Processing Method     | 20211103 Usnic Acid Oil                                         |                  |          |
| Instrument Name       | HPLC-PDA Plus                                                   |                  |          |
| Vial Number           | 10                                                              | Injection Number | 1        |
| Operator              | dan.rambu                                                       | Chromera Version | 4.2.0.64 |

UBO 10 mg/ML : 320:10:400:10 : 1

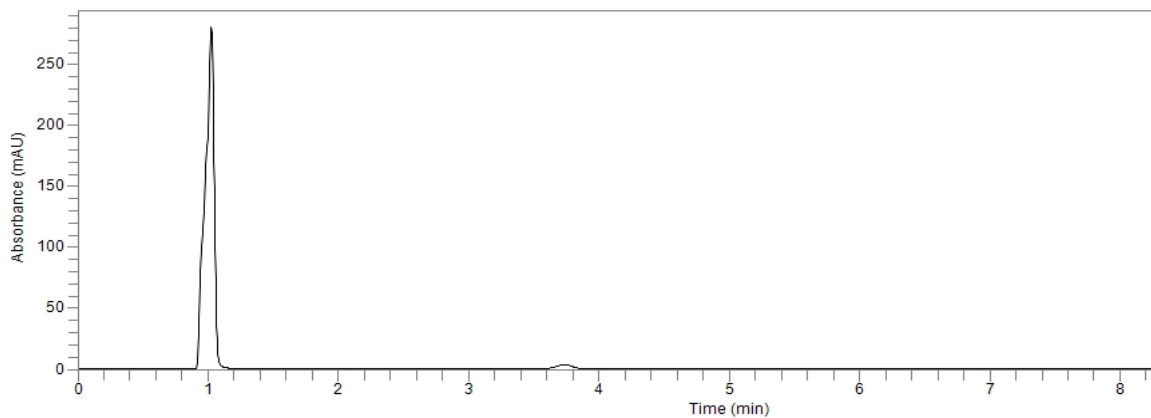

UBO 10 mg/ML : 282:10:400:10 : 1

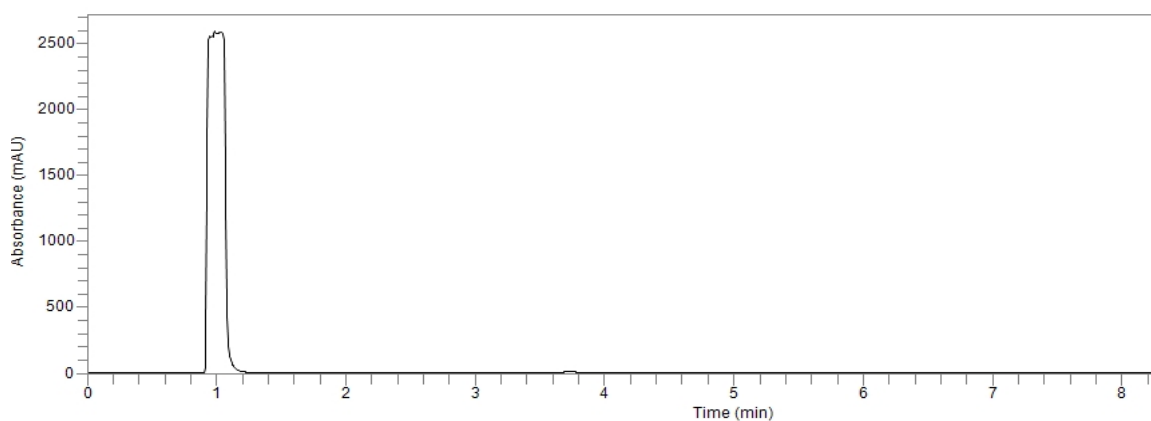

| Peak # | RT (min) | Component Name | Channel       | Area      | Height  | BL |
|--------|----------|----------------|---------------|-----------|---------|----|
| 1      | 1.022    |                | 320:10:400:10 | 1,394,209 | 280,739 | BB |

|              |       |            |               |            |           |    |
|--------------|-------|------------|---------------|------------|-----------|----|
| 1            | 1.040 |            | 282:10:400:10 | 22,857,228 | 2,589,158 | BE |
| 2            | 1.845 |            | 282:10:400:10 | 30,779     | 1,553     | EV |
| 3            | 2.450 |            | 282:10:400:10 | 11,736     | 1,338     | VV |
| 4            | 2.585 |            | 282:10:400:10 | 8,724      | 910       | VB |
| 5            | 3.735 | Usnic Acid | 282:10:400:10 | 130,381    | 12,729    | BB |
| 2            | 3.736 |            | 320:10:400:10 | 38,721     | 3,945     | BB |
| <b>Total</b> |       |            |               | 24,471,778 |           |    |

1 08-56-41 - Copy 11-

415

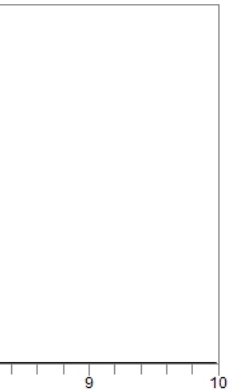

| Final Amount | Units |
|--------------|-------|
|              |       |

|        |       |
|--------|-------|
|        |       |
|        |       |
|        |       |
|        |       |
| 9.8288 | µg/mL |
|        |       |
| 9.8288 |       |

## Sample Report - Multi-Channel

|                       |                                                                 |                  |          |
|-----------------------|-----------------------------------------------------------------|------------------|----------|
| Sample Name           | UBO 10 mg/ML                                                    |                  |          |
| Batch Group/Name      | UMF Ovidius/20211109 Usnea barbata oil extract - Copy 11-10-202 |                  |          |
| Acquisition Date/Time | 11.9.2021 11:41:43 PM                                           |                  |          |
| Acquisition Method    | 20211103 Usnic Acid Oil                                         |                  |          |
| Processing Method     | 20211103 Usnic Acid Oil                                         |                  |          |
| Instrument Name       | HPLC-PDA Plus                                                   |                  |          |
| Vial Number           | 10                                                              | Injection Number | 2        |
| Operator              | dan.rambu                                                       | Chromera Version | 4.2.0.64 |

UBO 10 mg/ML : 320:10:400:10 : 2

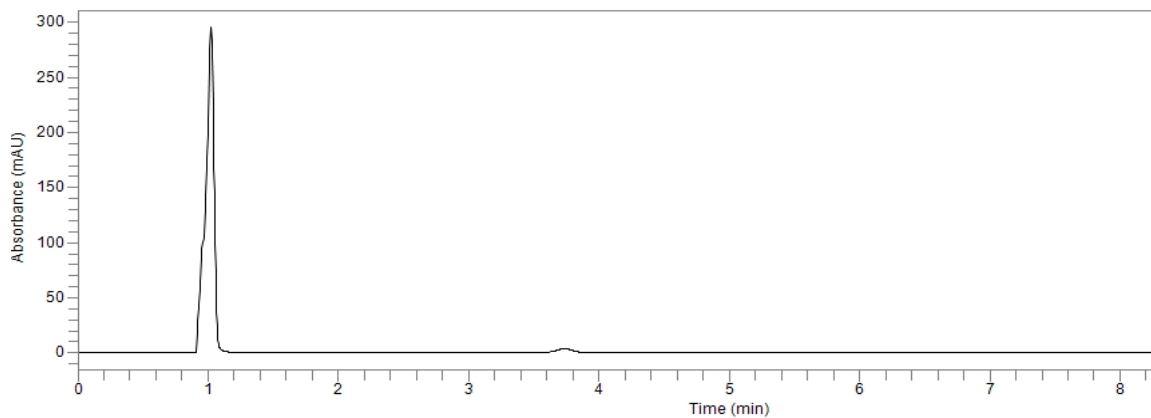

UBO 10 mg/ML : 282:10:400:10 : 2

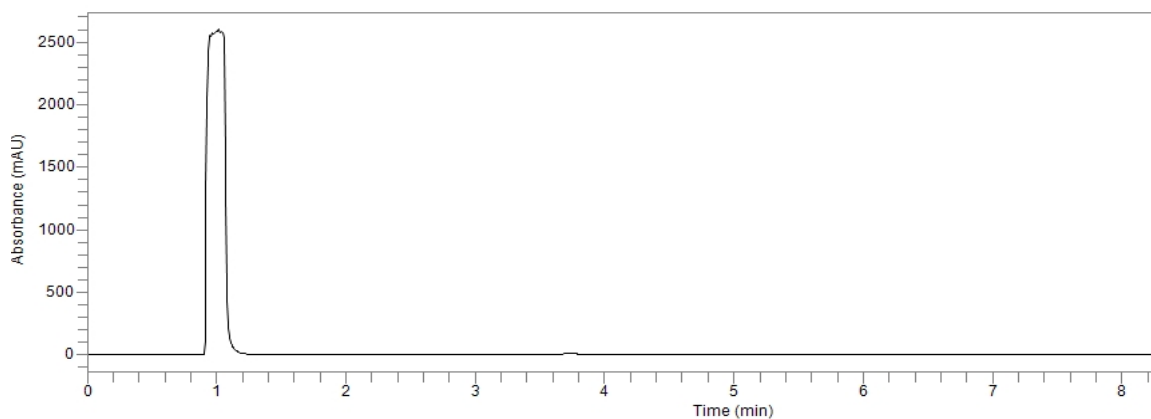

| Peak # | RT (min) | Component Name | Channel       | Area       | Height    | BL |
|--------|----------|----------------|---------------|------------|-----------|----|
| 1      | 1.014    |                | 282:10:400:10 | 23,552,505 | 2,605,462 | BE |

|              |       |            |               |            |         |    |
|--------------|-------|------------|---------------|------------|---------|----|
| 1            | 1.019 |            | 320:10:400:10 | 1,379,523  | 296,221 | BB |
| 2            | 1.832 |            | 320:10:400:10 | 353        | 100     | BB |
| 2            | 1.838 |            | 282:10:400:10 | 22,441     | 1,327   | EB |
| 3            | 2.452 |            | 282:10:400:10 | 6,421      | 982     | BV |
| 4            | 2.573 |            | 282:10:400:10 | 2,891      | 525     | VB |
| 5            | 3.736 | Usnic Acid | 282:10:400:10 | 132,381    | 12,733  | BB |
| 3            | 3.736 |            | 320:10:400:10 | 36,977     | 3,899   | BB |
| <b>Total</b> |       |            |               | 25,133,492 |         |    |

1 08-56-41 - Copy 11-

415

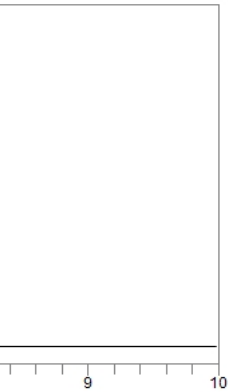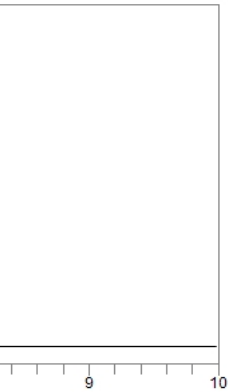

| Final Amount | Units |
|--------------|-------|
|              |       |

|        |       |
|--------|-------|
|        |       |
|        |       |
|        |       |
|        |       |
|        |       |
| 9,9662 | µg/mL |
|        |       |
| 9,9662 |       |



## Sample Report - Multi-Channel

|                       |                                                                 |                  |          |
|-----------------------|-----------------------------------------------------------------|------------------|----------|
| Sample Name           | UBO 10 mg/ML                                                    |                  |          |
| Batch Group/Name      | UMF Ovidius/20211109 Usnea barbata oil extract - Copy 11-10-202 |                  |          |
| Acquisition Date/Time | 11.9.2021 11:53:24 PM                                           |                  |          |
| Acquisition Method    | 20211103 Usnic Acid Oil                                         |                  |          |
| Processing Method     | 20211103 Usnic Acid Oil                                         |                  |          |
| Instrument Name       | HPLC-PDA Plus                                                   |                  |          |
| Vial Number           | 10                                                              | Injection Number | 3        |
| Operator              | dan.rambu                                                       | Chromera Version | 4.2.0.64 |

UBO 10 mg/ML : 320:10:400:10 : 3

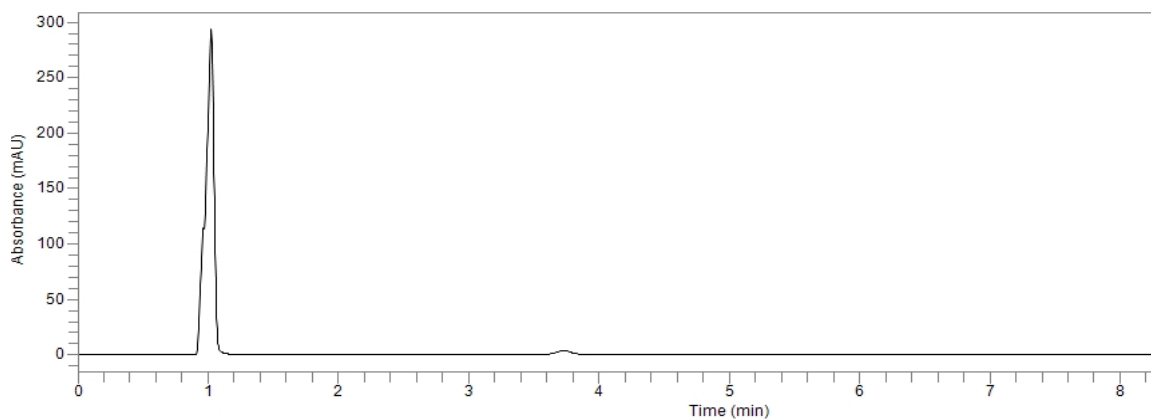

UBO 10 mg/ML : 282:10:400:10 : 3

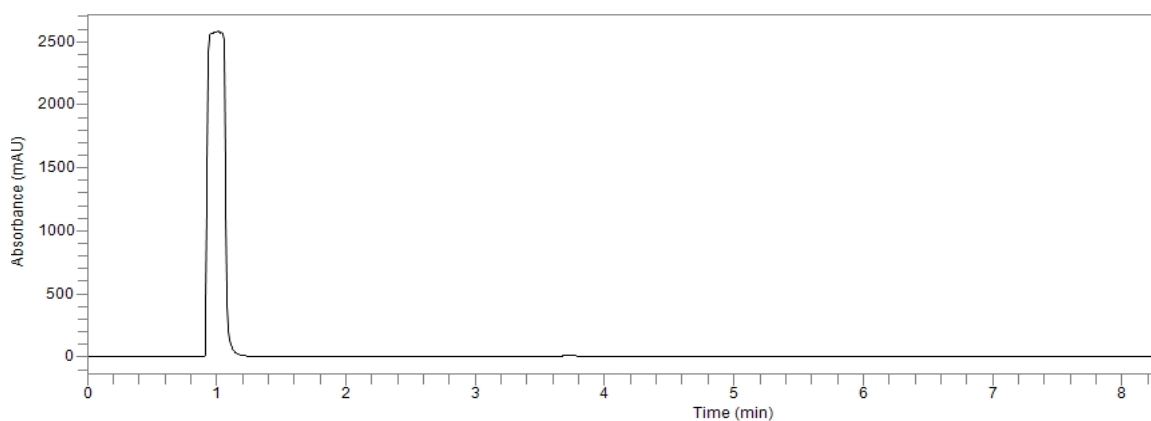

| Peak # | RT (min) | Component Name | Channel       | Area       | Height    | BL |
|--------|----------|----------------|---------------|------------|-----------|----|
| 1      | 1.006    |                | 282:10:400:10 | 22,503,179 | 2,586,849 | BE |

|              |       |            |               |            |         |    |
|--------------|-------|------------|---------------|------------|---------|----|
| 1            | 1.020 |            | 320:10:400:10 | 1,353,588  | 294,104 | BB |
| 2            | 1.848 |            | 282:10:400:10 | 14,391     | 1,108   | EB |
| 3            | 2.448 |            | 282:10:400:10 | 8,954      | 1,143   | BV |
| 4            | 2.575 |            | 282:10:400:10 | 7,539      | 816     | VB |
| 5            | 3.732 | Usnic Acid | 282:10:400:10 | 121,871    | 12,510  | BB |
| 2            | 3.734 |            | 320:10:400:10 | 36,101     | 3,819   | BB |
| <b>Total</b> |       |            |               | 24,045,622 |         |    |

1 08-56-41 - Copy 11-

415



| Final Amount | Units |
|--------------|-------|
|              |       |

|        |       |
|--------|-------|
|        |       |
|        |       |
|        |       |
|        |       |
| 9,2438 | µg/mL |
|        |       |
| 9.2438 |       |

# Sample Report - Multi-Channel

Sample Name UBO 10 mg/ML  
 Batch Group/Name UMF Ovidius/20211109 Usnea barbata oil extract - Copy 11-10-202  
 Acquisition Date/Time 11.10.2021 12:05:05 AM  
 Acquisition Method 20211103 Usnic Acid Oil  
 Processing Method 20211103 Usnic Acid Oil  
 Instrument Name HPLC-PDA Plus  
 Vial Number 10  
 Operator dan.rambu

Injection Number 4  
 Chromera Version 4.2.0.64

UBO 10 mg/ML : 320:10:400:10 : 4

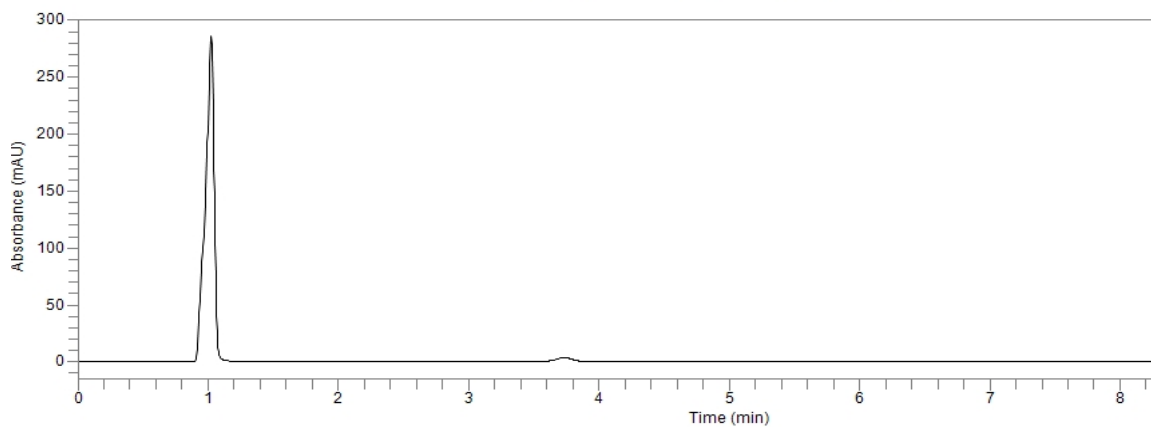

UBO 10 mg/ML : 282:10:400:10 : 4

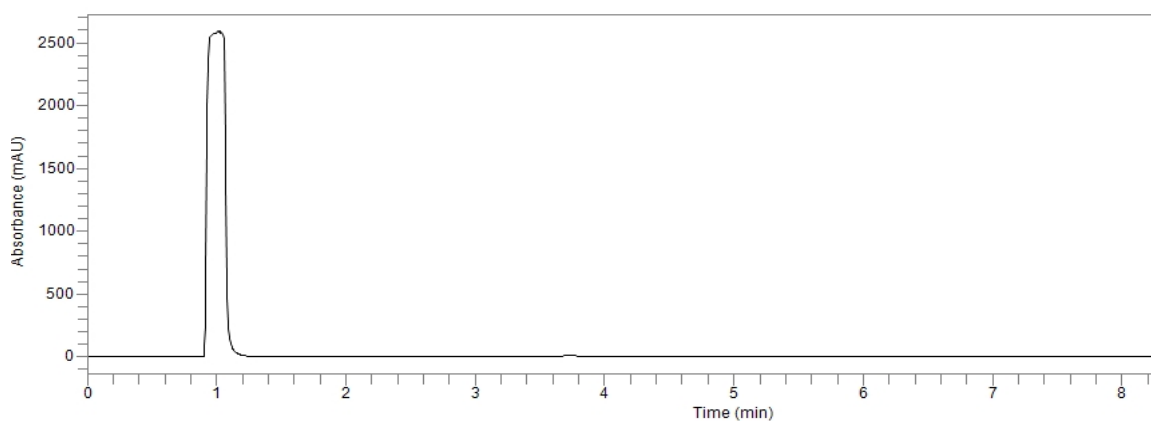

| Peak # | RT (min) | Component Name | Channel       | Area      | Height  | BL |
|--------|----------|----------------|---------------|-----------|---------|----|
| 1      | 1.020    |                | 320:10:400:10 | 1,373,874 | 286,886 | BB |

|              |       |            |               |            |           |    |
|--------------|-------|------------|---------------|------------|-----------|----|
| 1            | 1.022 |            | 282:10:400:10 | 23,318,679 | 2,595,674 | BE |
| 2            | 1.843 |            | 282:10:400:10 | 31,803     | 1,526     | EV |
| 3            | 2.444 |            | 282:10:400:10 | 12,268     | 1,307     | VV |
| 4            | 2.580 |            | 282:10:400:10 | 8,966      | 928       | VB |
| 2            | 3.733 |            | 320:10:400:10 | 37,174     | 3,872     | BB |
| 5            | 3.734 | Usnic Acid | 282:10:400:10 | 128,650    | 12,620    | BB |
| <b>Total</b> |       |            |               | 24,911,414 |           |    |

1 08-56-41 - Copy 11-

415



| Final Amount | Units |
|--------------|-------|
|              |       |

|        |       |
|--------|-------|
|        |       |
|        |       |
|        |       |
|        |       |
|        |       |
| 9,7097 | µg/mL |
| 9.7097 |       |



## Sample Report - Multi-Channel

|                       |                                                                 |                  |          |
|-----------------------|-----------------------------------------------------------------|------------------|----------|
| Sample Name           | UBO 10 mg/ML                                                    |                  |          |
| Batch Group/Name      | UMF Ovidius/20211109 Usnea barbata oil extract - Copy 11-10-202 |                  |          |
| Acquisition Date/Time | 11.10.2021 12:16:46 AM                                          |                  |          |
| Acquisition Method    | 20211103 Usnic Acid Oil                                         |                  |          |
| Processing Method     | 20211103 Usnic Acid Oil                                         |                  |          |
| Instrument Name       | HPLC-PDA Plus                                                   |                  |          |
| Vial Number           | 10                                                              | Injection Number | 5        |
| Operator              | dan.rambu                                                       | Chromera Version | 4.2.0.64 |

UBO 10 mg/ML : 320:10:400:10 : 5

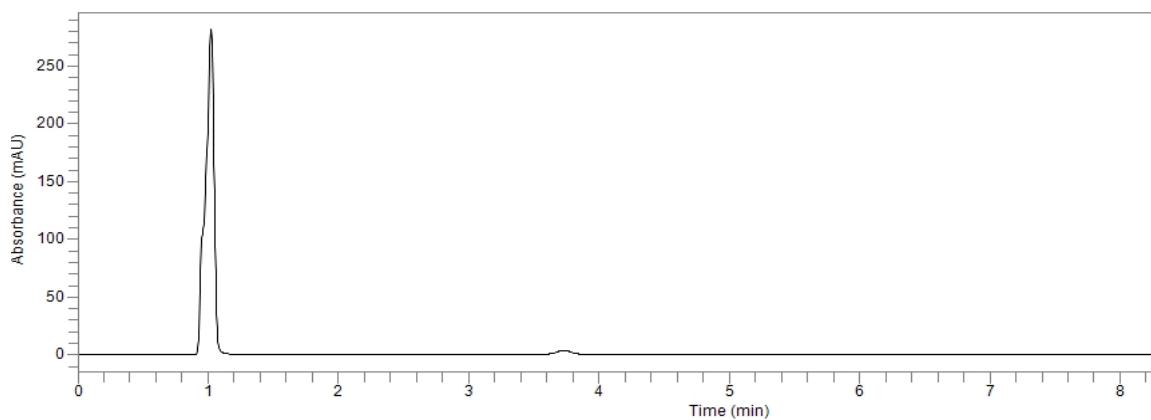

UBO 10 mg/ML : 282:10:400:10 : 5

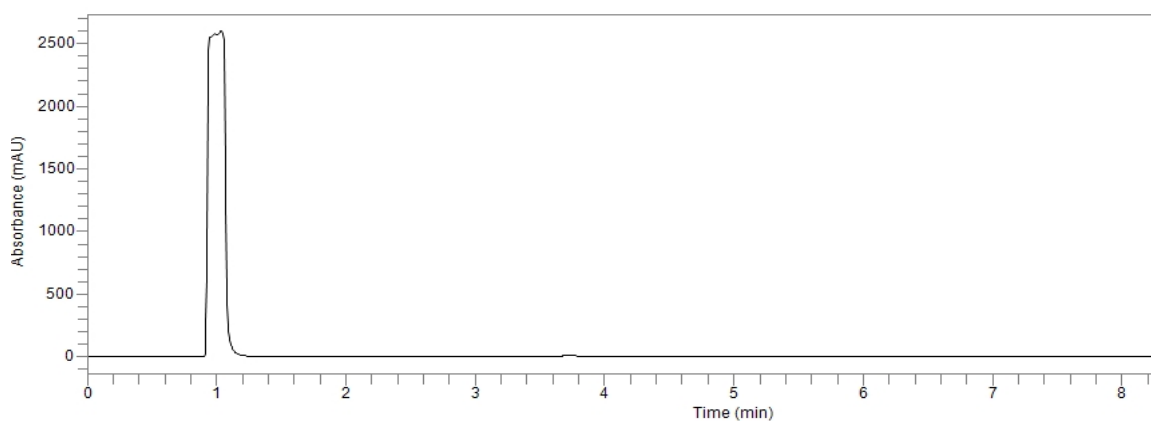

| Peak # | RT (min) | Component Name | Channel       | Area      | Height  | BL |
|--------|----------|----------------|---------------|-----------|---------|----|
| 1      | 1.020    |                | 320:10:400:10 | 1,348,971 | 282,618 | BB |

|              |       |            |               |            |           |    |
|--------------|-------|------------|---------------|------------|-----------|----|
| 1            | 1.034 |            | 282:10:400:10 | 22,161,319 | 2,604,552 | BE |
| 2            | 1.840 |            | 282:10:400:10 | 28,940     | 1,528     | EV |
| 3            | 2.450 |            | 282:10:400:10 | 12,313     | 1,309     | VV |
| 4            | 2.577 |            | 282:10:400:10 | 9,212      | 942       | VB |
| 2            | 3.731 |            | 320:10:400:10 | 36,739     | 3,862     | BB |
| 5            | 3.731 | Usnic Acid | 282:10:400:10 | 129,583    | 12,595    | BB |
| <b>Total</b> |       |            |               | 23,727,078 |           |    |

1 08-56-41 - Copy 11-

415



| Final Amount | Units |
|--------------|-------|
|              |       |

|        |       |
|--------|-------|
|        |       |
|        |       |
|        |       |
|        |       |
|        |       |
| 9,7739 | µg/mL |
| 9.7739 |       |

## Sample Report - Multi-Channel

|                       |                                                                 |                  |          |
|-----------------------|-----------------------------------------------------------------|------------------|----------|
| Sample Name           | UBO 10 mg/ML                                                    |                  |          |
| Batch Group/Name      | UMF Ovidius/20211109 Usnea barbata oil extract - Copy 11-10-202 |                  |          |
| Acquisition Date/Time | 11.10.2021 12:28:26 AM                                          |                  |          |
| Acquisition Method    | 20211103 Usnic Acid Oil                                         |                  |          |
| Processing Method     | 20211103 Usnic Acid Oil                                         |                  |          |
| Instrument Name       | HPLC-PDA Plus                                                   |                  |          |
| Vial Number           | 10                                                              | Injection Number | 6        |
| Operator              | dan.rambu                                                       | Chromera Version | 4.2.0.64 |

UBO 10 mg/ML : 320:10:400:10 : 6

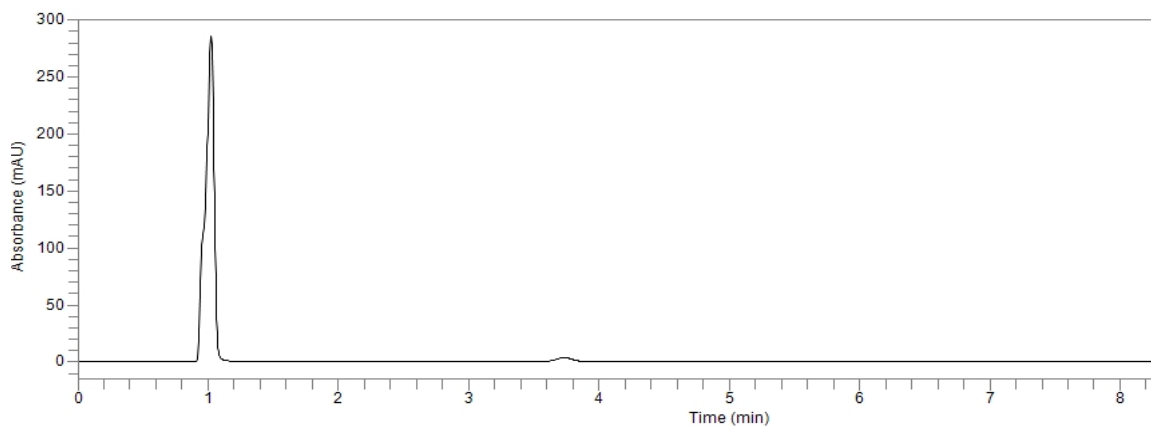

UBO 10 mg/ML : 282:10:400:10 : 6

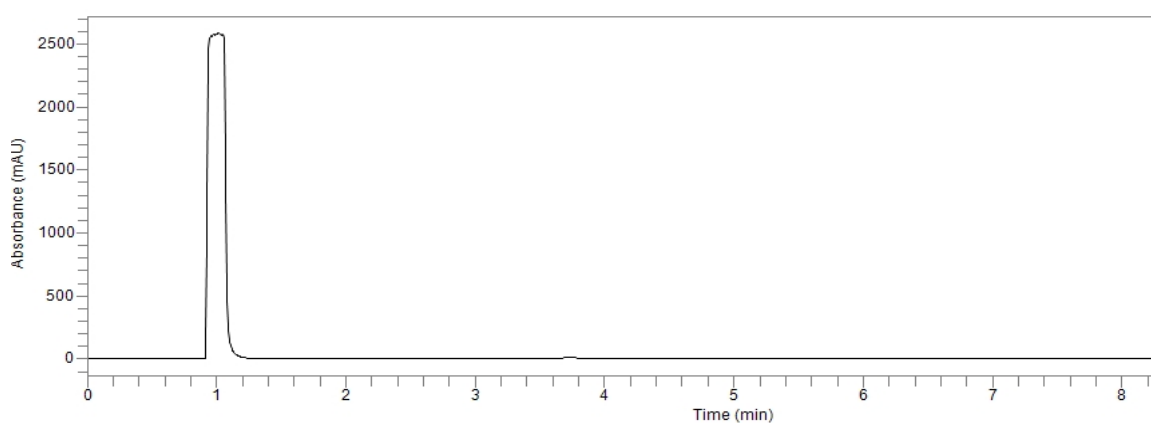

| Peak # | RT (min) | Component Name | Channel       | Area       | Height    | BL |
|--------|----------|----------------|---------------|------------|-----------|----|
| 1      | 1.011    |                | 282:10:400:10 | 22,466,679 | 2,588,742 | BE |

|              |       |            |               |            |         |    |
|--------------|-------|------------|---------------|------------|---------|----|
| 1            | 1.020 |            | 320:10:400:10 | 1,381,836  | 286,639 | BB |
| 2            | 1.842 |            | 282:10:400:10 | 33,114     | 1,573   | EV |
| 3            | 2.449 |            | 282:10:400:10 | 12,483     | 1,335   | VV |
| 4            | 2.580 |            | 282:10:400:10 | 8,557      | 933     | VB |
| 2            | 3.733 |            | 320:10:400:10 | 37,959     | 3,918   | BB |
| 5            | 3.734 | Usnic Acid | 282:10:400:10 | 133,576    | 12,762  | BB |
| <b>Total</b> |       |            |               | 24,074,206 |         |    |

1 08-56-41 - Copy 11-

415



| Final Amount | Units |
|--------------|-------|
|              |       |

|         |       |
|---------|-------|
|         |       |
|         |       |
|         |       |
|         |       |
|         |       |
| 10,0484 | µg/mL |
| 10.0484 |       |
