# Supplementary material for: Antioxidant, Cytotoxic, and Rheological Properties of Canola Oil Extract of Usnea barbata (L.) Weber ex F.H. Wigg from Călimani Mountains, Romania
Source: MDPI journal article supplement (doi:10.3390/plants11070854), 2022-03-23
Supplement: s1 [file s1]

## Sample Replicate Report - Multi-Channel

|                    |                                                                                                          |                  |            |
|--------------------|----------------------------------------------------------------------------------------------------------|------------------|------------|
| Sample Name        | UA std 50 ug/mL                                                                                          |                  |            |
| Batch Group/Name   | UMF Ovidius/20211109 Usnea barbata oil extract - Copy 11-10-2021 08-56-41 - Copy 11-10-2021 09-15-52 - C |                  |            |
| Acquisition Method | 20211103 Usnic Acid Oil                                                                                  |                  |            |
| Processing Method  | 20211103 Usnic Acid Oil                                                                                  |                  |            |
| Instrument Name    | HPLC-PDA Plus                                                                                            |                  |            |
| Vial Number        | 8                                                                                                        | Operator         | dan.rambu  |
| Acquisition Date   | 11/9/2021                                                                                                | Chromera Version | 4.2.0.6415 |

UA std 50 ug/mL : 320:10:400:10 : 1

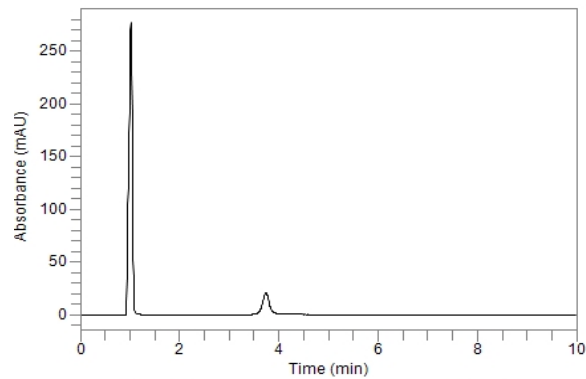

UA std 50 ug/mL : 320:10:400:10 : 2

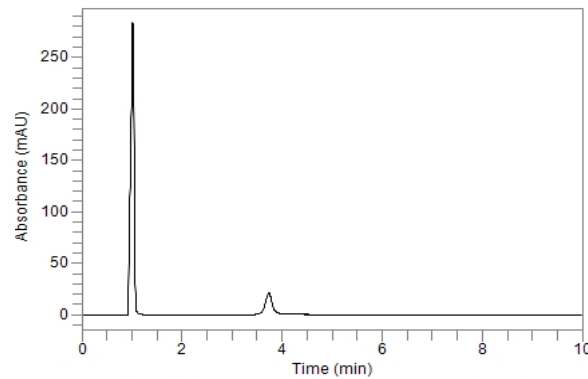

UA std 50 ug/mL : 320:10:400:10 : 3

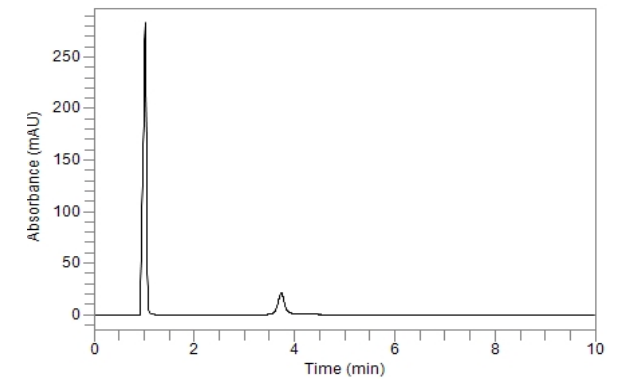

UA std 50 ug/mL : 320:10:400:10 : 4

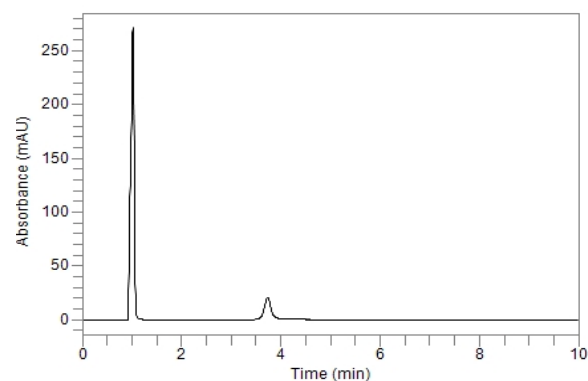

UA std 50 ug/mL : 320:10:400:10 : 5

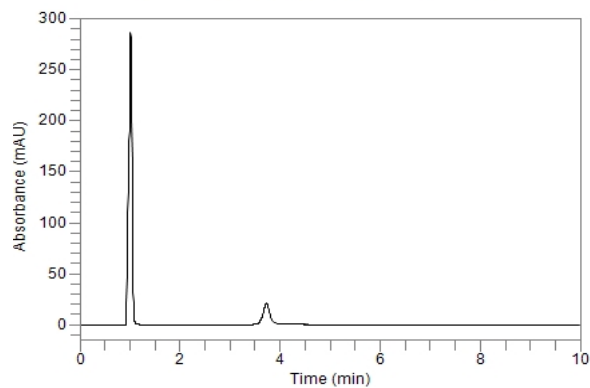

Channel Name 320:10:400:10

| Component Name | Avg RT (min) | RT %RSD | Avg Area | Area %RSD | Avg Height | Height %RSD | Avg Final Amount | Final %RSD |
|----------------|--------------|---------|----------|-----------|------------|-------------|------------------|------------|
|                | N/A          | N/A     | N/A      | N/A       | N/A        | N/A         | N/A              | N/A        |

UA std 50 ug/mL : 282:10:400:10 : 1

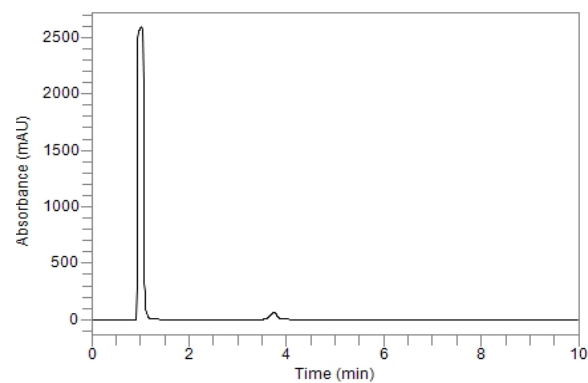

UA std 50 ug/mL : 282:10:400:10 : 2

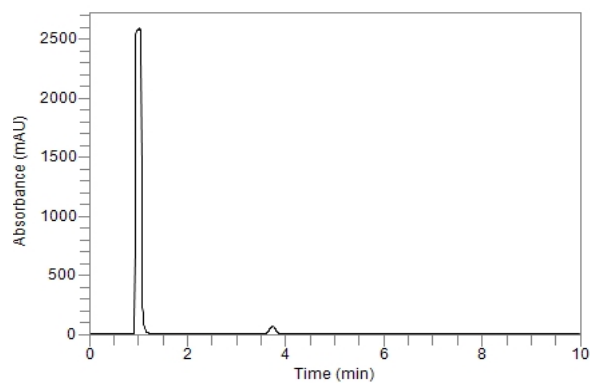

UA std 50 ug/mL : 282:10:400:10 : 3

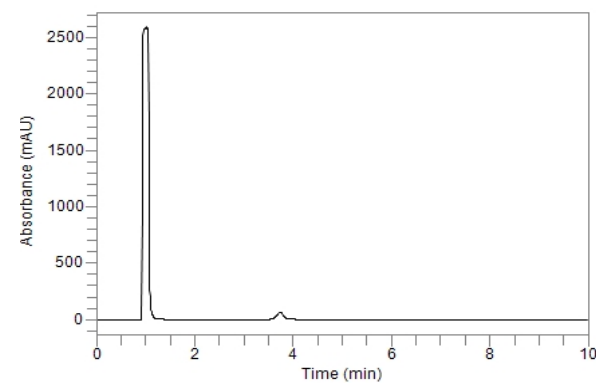

UA std 50 ug/mL : 282:10:400:10 : 4

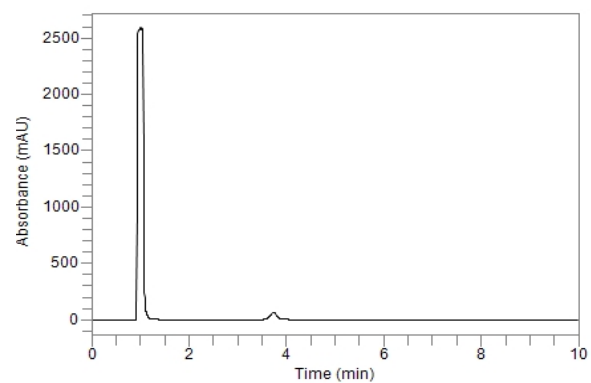

UA std 50 ug/mL : 282:10:400:10 : 5

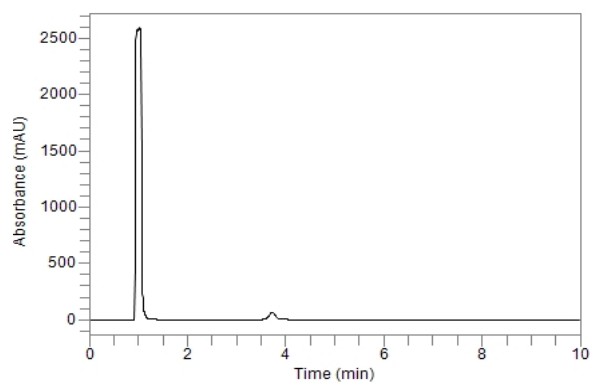

Channel Name 282:10:400:10

| Component Name | Avg RT (min) | RT %RSD | Avg Area  | Area %RSD | Avg Height | Height %RSD | Avg Final Amount | Final %RSD |
|----------------|--------------|---------|-----------|-----------|------------|-------------|------------------|------------|
| Usnic Acid     | 3.735        | 0.115   | 712,154.0 | 2.152     | 67,653.2   | 0.845       | 49.8148          | 2.115      |

Copy 11-10-

## Sample Replicate Report - Multi-Channel

|                    |                                                                                                          |                  |            |
|--------------------|----------------------------------------------------------------------------------------------------------|------------------|------------|
| Sample Name        | UBO 10 mg/ML                                                                                             |                  |            |
| Batch Group/Name   | UMF Ovidius/20211109 Usnea barbata oil extract - Copy 11-10-2021 08-56-41 - Copy 11-10-2021 09-15-52 - C |                  |            |
| Acquisition Method | 20211103 Usnic Acid Oil                                                                                  |                  |            |
| Processing Method  | 20211103 Usnic Acid Oil                                                                                  |                  |            |
| Instrument Name    | HPLC-PDA Plus                                                                                            |                  |            |
| Vial Number        | 10                                                                                                       | Operator         | dan.rambu  |
| Acquisition Date   | 11/9/2021                                                                                                | Chromera Version | 4.2.0.6415 |

UBO 10 mg/ML : 320:10:400:10 : 1

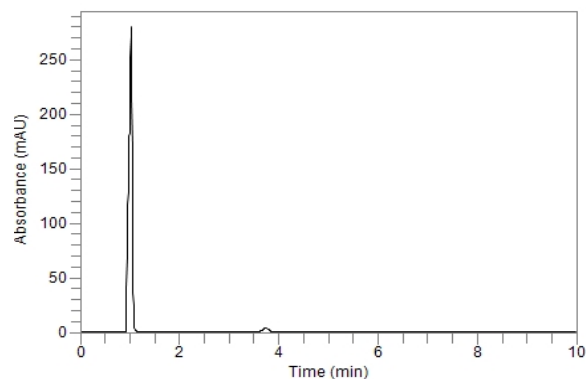

Channel Name      320:10:400:10

| Component Name | Avg RT<br>(min) | RT<br>%RSD | Avg Area | Area<br>%RSD | Avg Height | Height<br>%RSD | Avg Final<br>Amount | Final<br>%RSD |
|----------------|-----------------|------------|----------|--------------|------------|----------------|---------------------|---------------|
|                | N/A             | N/A        | N/A      | N/A          | N/A        | N/A            | N/A                 | N/A           |

UBO 10 mg/ML : 282:10:400:10 : 1

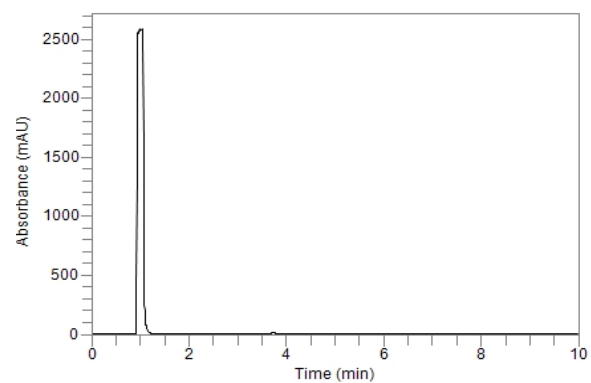

Channel Name 282:10:400:10

| Component Name | Avg RT (min) | RT %RSD | Avg Area  | Area %RSD | Avg Height | Height %RSD | Avg Final Amount | Final %RSD |
|----------------|--------------|---------|-----------|-----------|------------|-------------|------------------|------------|
| Usnic Acid     | 3.735        | N/A     | 130,381.4 | N/A       | 12,729.3   | N/A         | 9.8288           | N/A        |

Copy 11-10-

## Sample Replicate Report - Multi-Channel

|                    |                                                                                                          |                  |            |
|--------------------|----------------------------------------------------------------------------------------------------------|------------------|------------|
| Sample Name        | Canola Oil                                                                                               |                  |            |
| Batch Group/Name   | UMF Ovidius/20211109 Usnea barbata oil extract - Copy 11-10-2021 08-56-41 - Copy 11-10-2021 09-15-52 - C |                  |            |
| Acquisition Method | 20211103 Usnic Acid Oil                                                                                  |                  |            |
| Processing Method  | 20211103 Usnic Acid Oil                                                                                  |                  |            |
| Instrument Name    | HPLC-PDA Plus                                                                                            |                  |            |
| Vial Number        | 2                                                                                                        | Operator         | dan.rambu  |
| Acquisition Date   | 11/9/2021                                                                                                | Chromera Version | 4.2.0.6415 |

Canola Oil : 320:10:400:10 : 1

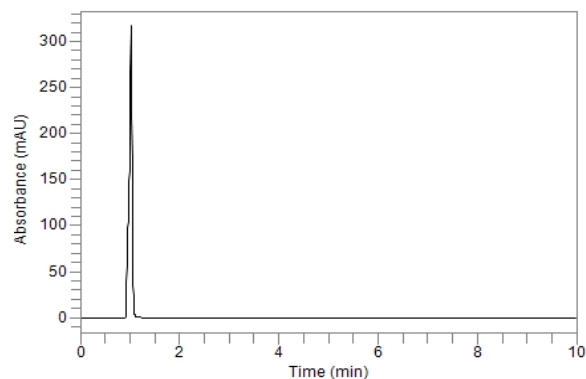

Channel Name      320:10:400:10

| Component Name | Avg RT<br>(min) | RT<br>%RSD | Avg Area | Area<br>%RSD | Avg Height | Height<br>%RSD | Avg Final<br>Amount | Final<br>%RSD |
|----------------|-----------------|------------|----------|--------------|------------|----------------|---------------------|---------------|
|                | N/A             | N/A        | N/A      | N/A          | N/A        | N/A            | N/A                 | N/A           |



Canola Oil : 282:10:400:10 : 1

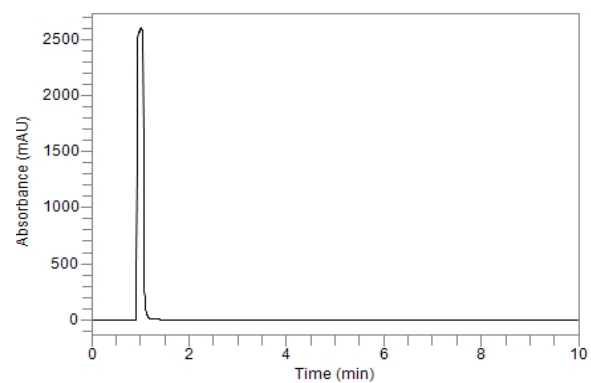

Channel Name 282:10:400:10

| Component Name | Avg RT (min) | RT %RSD | Avg Area | Area %RSD | Avg Height | Height %RSD | Avg Final Amount | Final %RSD |
|----------------|--------------|---------|----------|-----------|------------|-------------|------------------|------------|
|                | N/A          | N/A     | N/A      | N/A       | N/A        | N/A         | N/A              | N/A        |

Copy 11-10-

# Sample Report - Single Channel

Sample Name Acetone  
 Batch Group/Name UMF Ovidius/20211109 Usnea barbata oil extract - Copy 11-10-2021 08-56-4  
  
 Acquisition Method 20211103 Usnic Acid Oil  
 Processing Method 20211103 Usnic Acid Oil  
 Instrument Name HPLC-PDA Plus Channel Name 320:10:400:10  
 Vial Number 1 Injection Number 2  
 Operator dan.rambu Chromera Version 4.2.0.6415  
 Acquisition Date/Time 11.9.2021 4:17:34 PM

Acetone : Injection 2

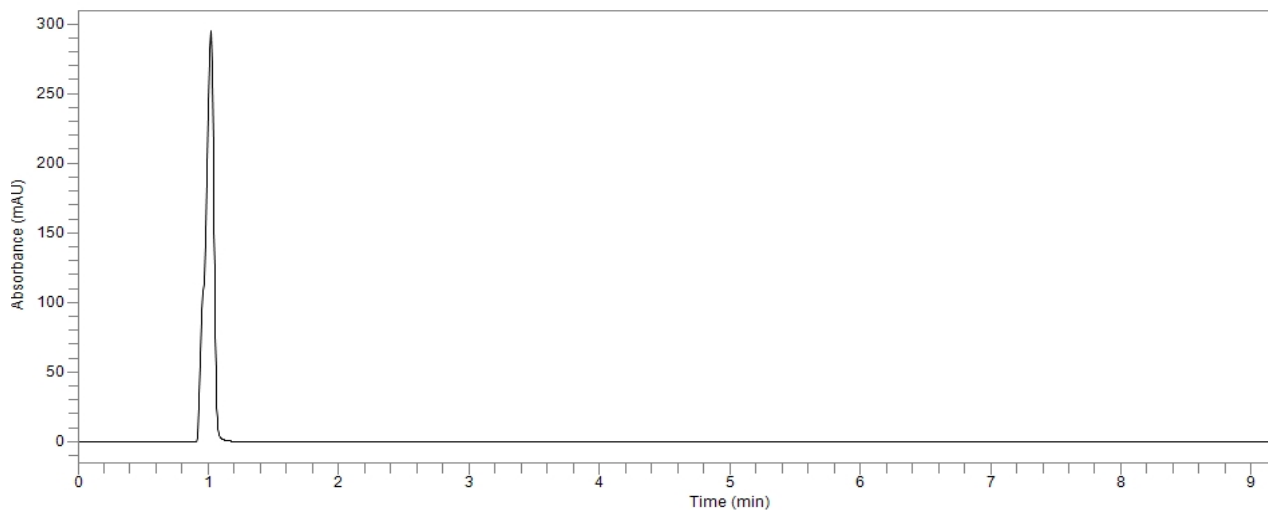

| Peak #       | RT (min) | Component Name | Area        | Height    | BL | Final Amount |
|--------------|----------|----------------|-------------|-----------|----|--------------|
| 1            | 0.545    |                | 332.0       | 98.8      | BB |              |
| 2            | 1.017    |                | 1,365,047.6 | 295,017.5 | BB |              |
| <b>Total</b> |          |                | 1,365,379.6 |           |    |              |

1 - Copy 11-

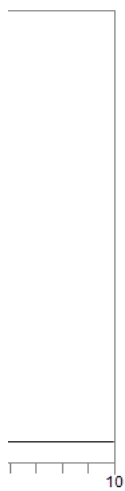

| Units |
|-------|
|       |
|       |
|       |

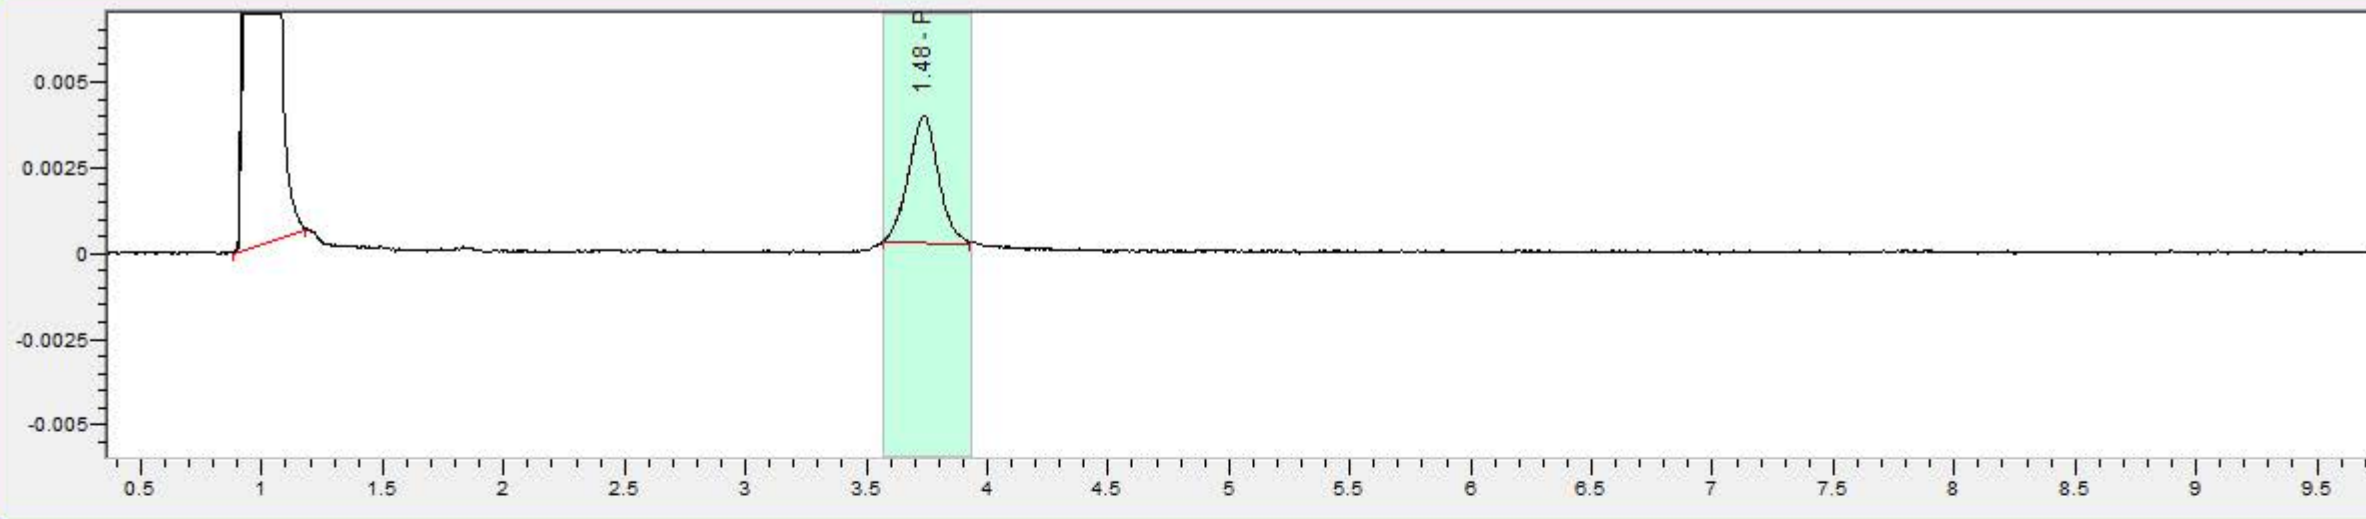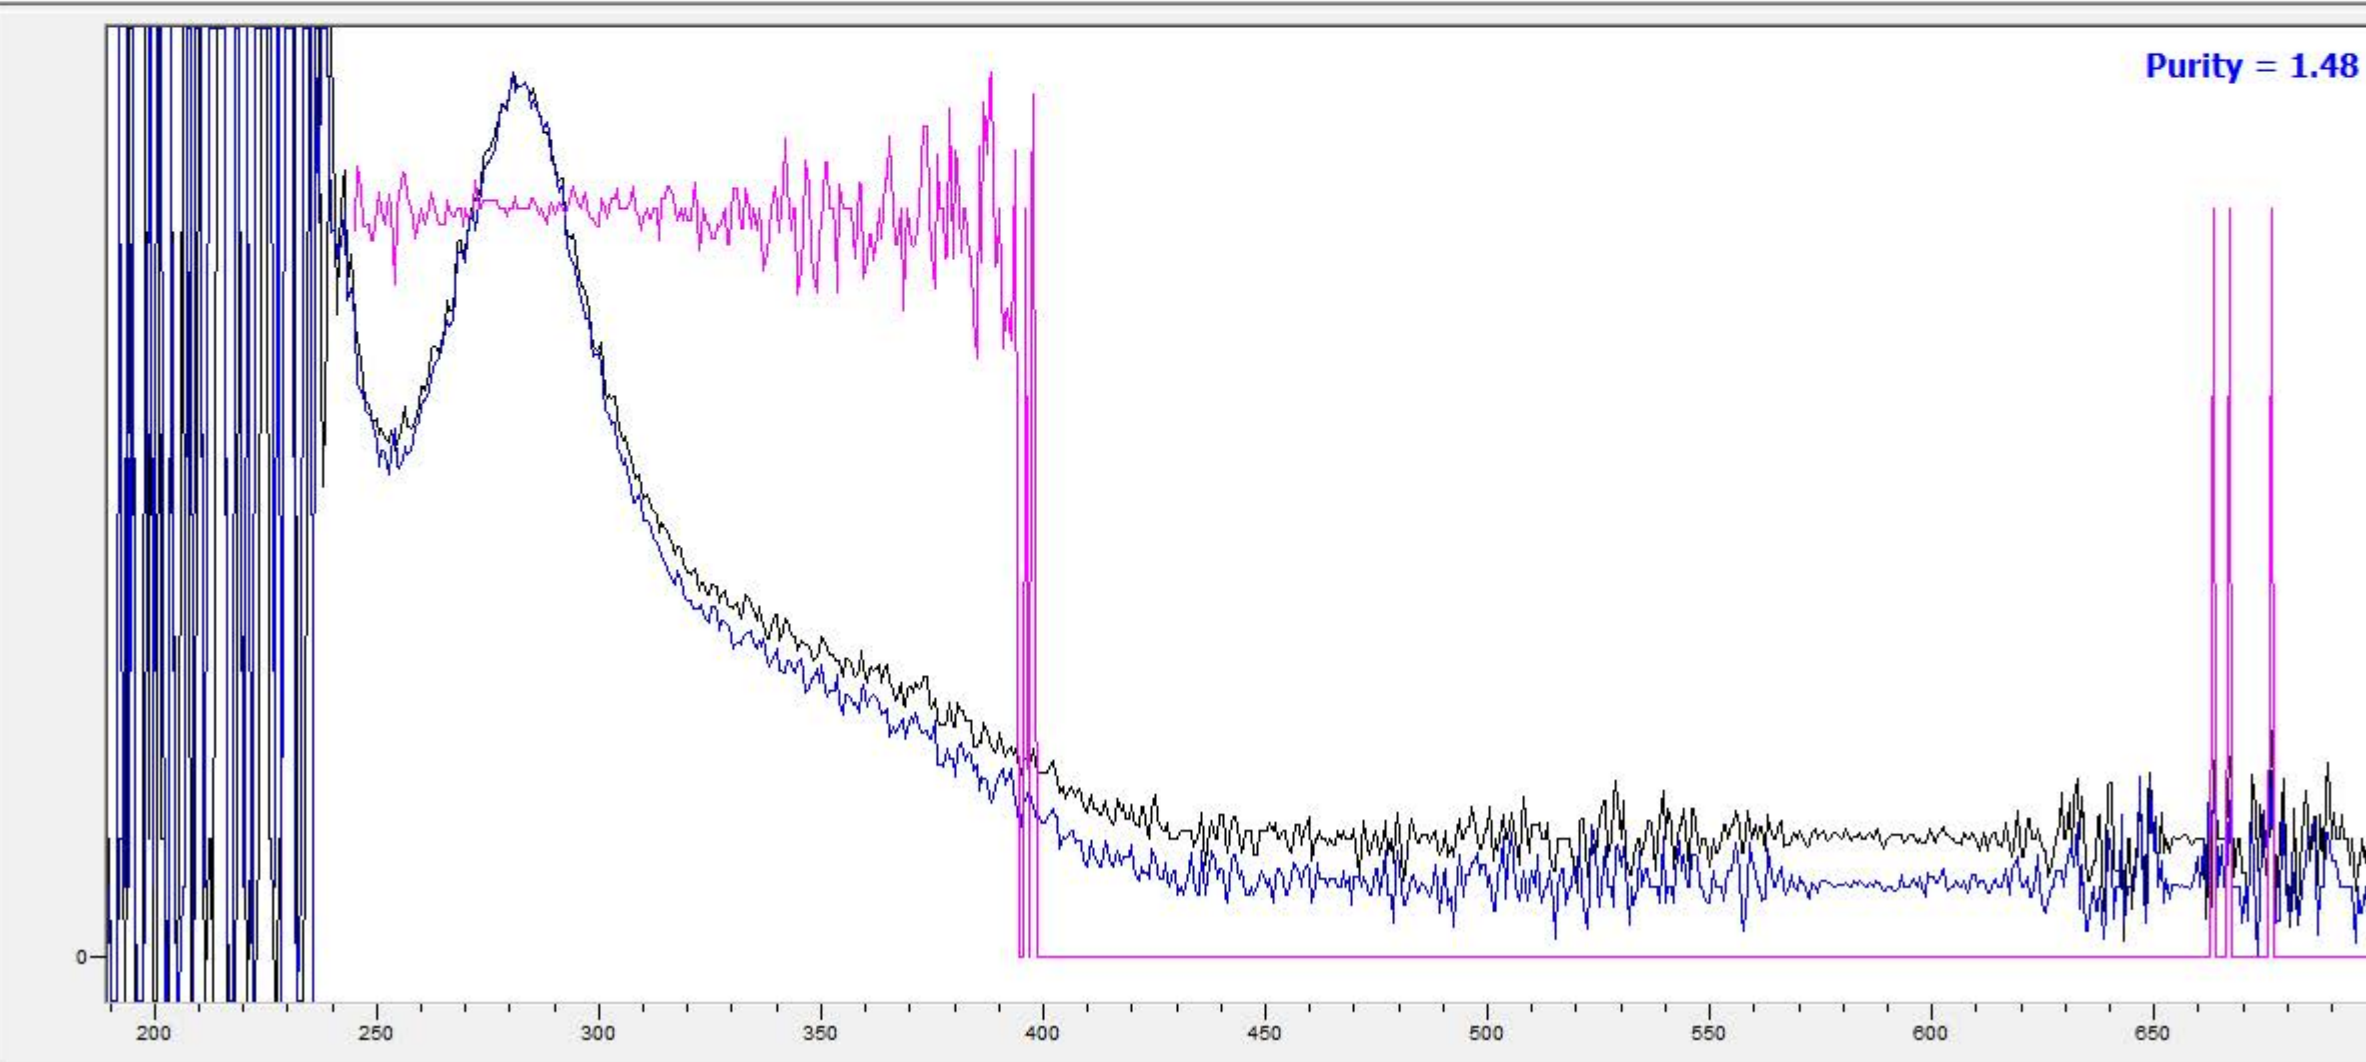

## Display

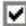

Upslope

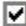

Downslope

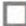

Baseline

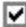

Purity Result
