# Supplementary material for: Antioxidant, Cytotoxic, and Rheological Properties of Canola Oil Extract of Usnea barbata (L.) Weber ex F.H. Wigg from Călimani Mountains, Romania
Source: Plants (Basel). 2022 Mar 23;11(7):854. doi: 10.3390/plants11070854 (PMC9002375; doi:10.3390/plants11070854)
Supplement: Supplementary file 1 [file plants-11-00854-s001.zip]

Archive with 11 entries (11 files):
- UHPLC LOD, LOQ.pdf
- UHPLC Specificity.pdf
- UHPLC Accuracy and recovery.pdf
- UHPLC Precision.pdf
- UHPLC Linearity.pdf
- Figure S1..pdf
- Figure S2..pdf
- Figure S3..pdf
- Figure S4, a,b.png
- Correlations.xlsx
- Figure S5..jpg
