# Supplementary material for: Antioxidant, Cytotoxic, and Rheological Properties of Canola Oil Extract of Usnea barbata (L.) Weber ex F.H. Wigg from Călimani Mountains, Romania
Source: Plants (Basel). 2022 Mar 23;11(7):854. doi: 10.3390/plants11070854 (PMC9002375; doi:10.3390/plants11070854)
Supplement: Supplementary file 1 [file plants-11-00854-s001.zip › Correlations.xlsx]

## Sheet: Sheet1
Pearson Correlation matrix
Variables	L*	a*	b*	hab	C*	Refractive index	K	n	ΔA	TPC ethanol	TPC acetone	Scavenger DPPH	Usnic acid	Al	Ca	Cr	Cu	Mg	Ni	Mortality at 15% conc.
L*	1
a*	-0.998931	1
b*	0.999	-0.999	1
hab	0.998267	-0.999	0.999298	1
C*	0.999	-0.999	0.999	0.999335	1
Refractive index	-0.901459	0.911818	-0.908009	-0.912644	-0.908207	1
K	0.715286	-0.703274	0.711947	0.697685	0.711611	-0.632456	1
n	0.502536	-0.490773	0.49323	0.489259	0.493108	-0.444994	0.0703598	1
ΔA	-0.983774	0.98498	-0.984746	-0.984864	-0.98477	0.8823	-0.787287	-0.414895	1
TPC ethanol	-0.944525	0.947316	-0.945929	-0.947824	-0.945997	0.90076	-0.480462	-0.57281	0.878343	1
TPC acetone	-0.989561	0.990757	-0.99027	-0.990765	-0.990301	0.917523	-0.620171	-0.543745	0.952507	0.98165	1
Scavenger DPPH	-0.998822	0.999109	-0.999072	-0.998939	-0.999083	0.903673	-0.682121	-0.512892	0.978557	0.955924	0.994158	1
Usnic acid	-0.998992	0.999059	-0.999105	-0.998892	-0.999112	0.894684	-0.693017	-0.501739	0.982808	0.947827	0.990662	0.999	1
Al	-0.999305	0.999335	-0.999424	-0.999119	-0.999429	0.897561	-0.697947	-0.5029	0.983819	0.946636	0.990389	0.999	0.999	1
Ca	-0.129377	0.13779	-0.132893	-0.140661	-0.133092	0.213851	0.498558	-0.318505	-0.0297581	0.44443	0.266395	0.166692	0.143945	0.138335	1
Cr	-0.987108	0.988416	-0.987788	-0.98859	-0.987824	0.905897	-0.603094	-0.538376	0.947959	0.983869	0.999325	0.992762	0.989487	0.988822	0.283865	1
Cu	-0.999284	0.999312	-0.999399	-0.999099	-0.999405	0.897188	-0.697886	-0.502585	0.983845	0.946525	0.990323	0.999	0.999	0.999	0.138173	0.988784	1
Mg	-0.401586	0.409414	-0.405382	-0.41118	-0.405559	0.522417	0.216933	-0.487253	0.249634	0.67779	0.526944	0.432604	0.408109	0.405009	0.936789	0.53538	0.404657	1
Ni	-0.999364	0.999413	-0.999498	-0.999189	-0.999	0.899035	-0.697517	-0.504337	0.98353	0.947381	0.990764	0.999	0.999	0.999	0.140004	0.989112	0.999	0.407269	1
Mortality at 15% conc.	-0.980635	0.984672	-0.982212	-0.985746	-0.982325	0.920128	-0.589895	-0.596221	0.951306	0.968856	0.991343	0.987292	0.983955	0.984022	0.240211	0.989525	0.983939	0.506255	0.984433	1
Values in bold are different from 0 with a significance level alpha=0.05
