# Supplementary figures and images for: Antioxidant, Cytotoxic, and Rheological Properties of Canola Oil Extract of Usnea barbata (L.) Weber ex F.H. Wigg from Călimani Mountains, Romania
Source: MDPI journal article supplement (doi:10.3390/plants11070854), 2022-03-23

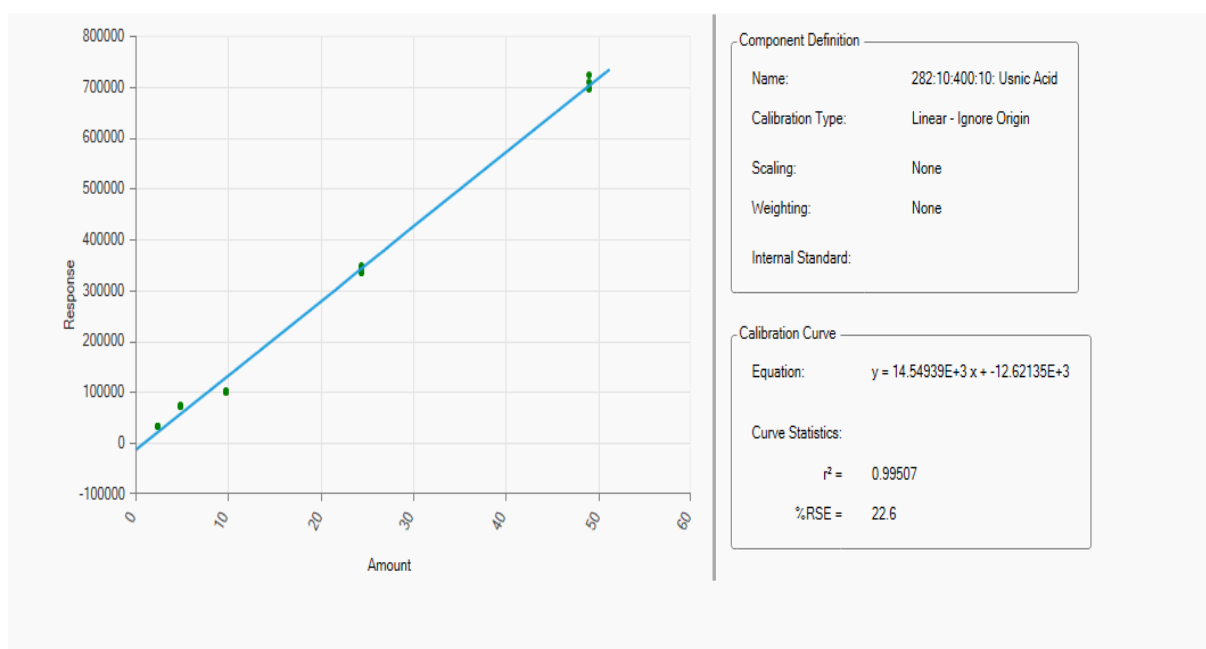

**Figure S3.** The calibration curve of usnic acid standard

Supplement: s1 [file s1]

Acetone : 282:10:400:10 : 1

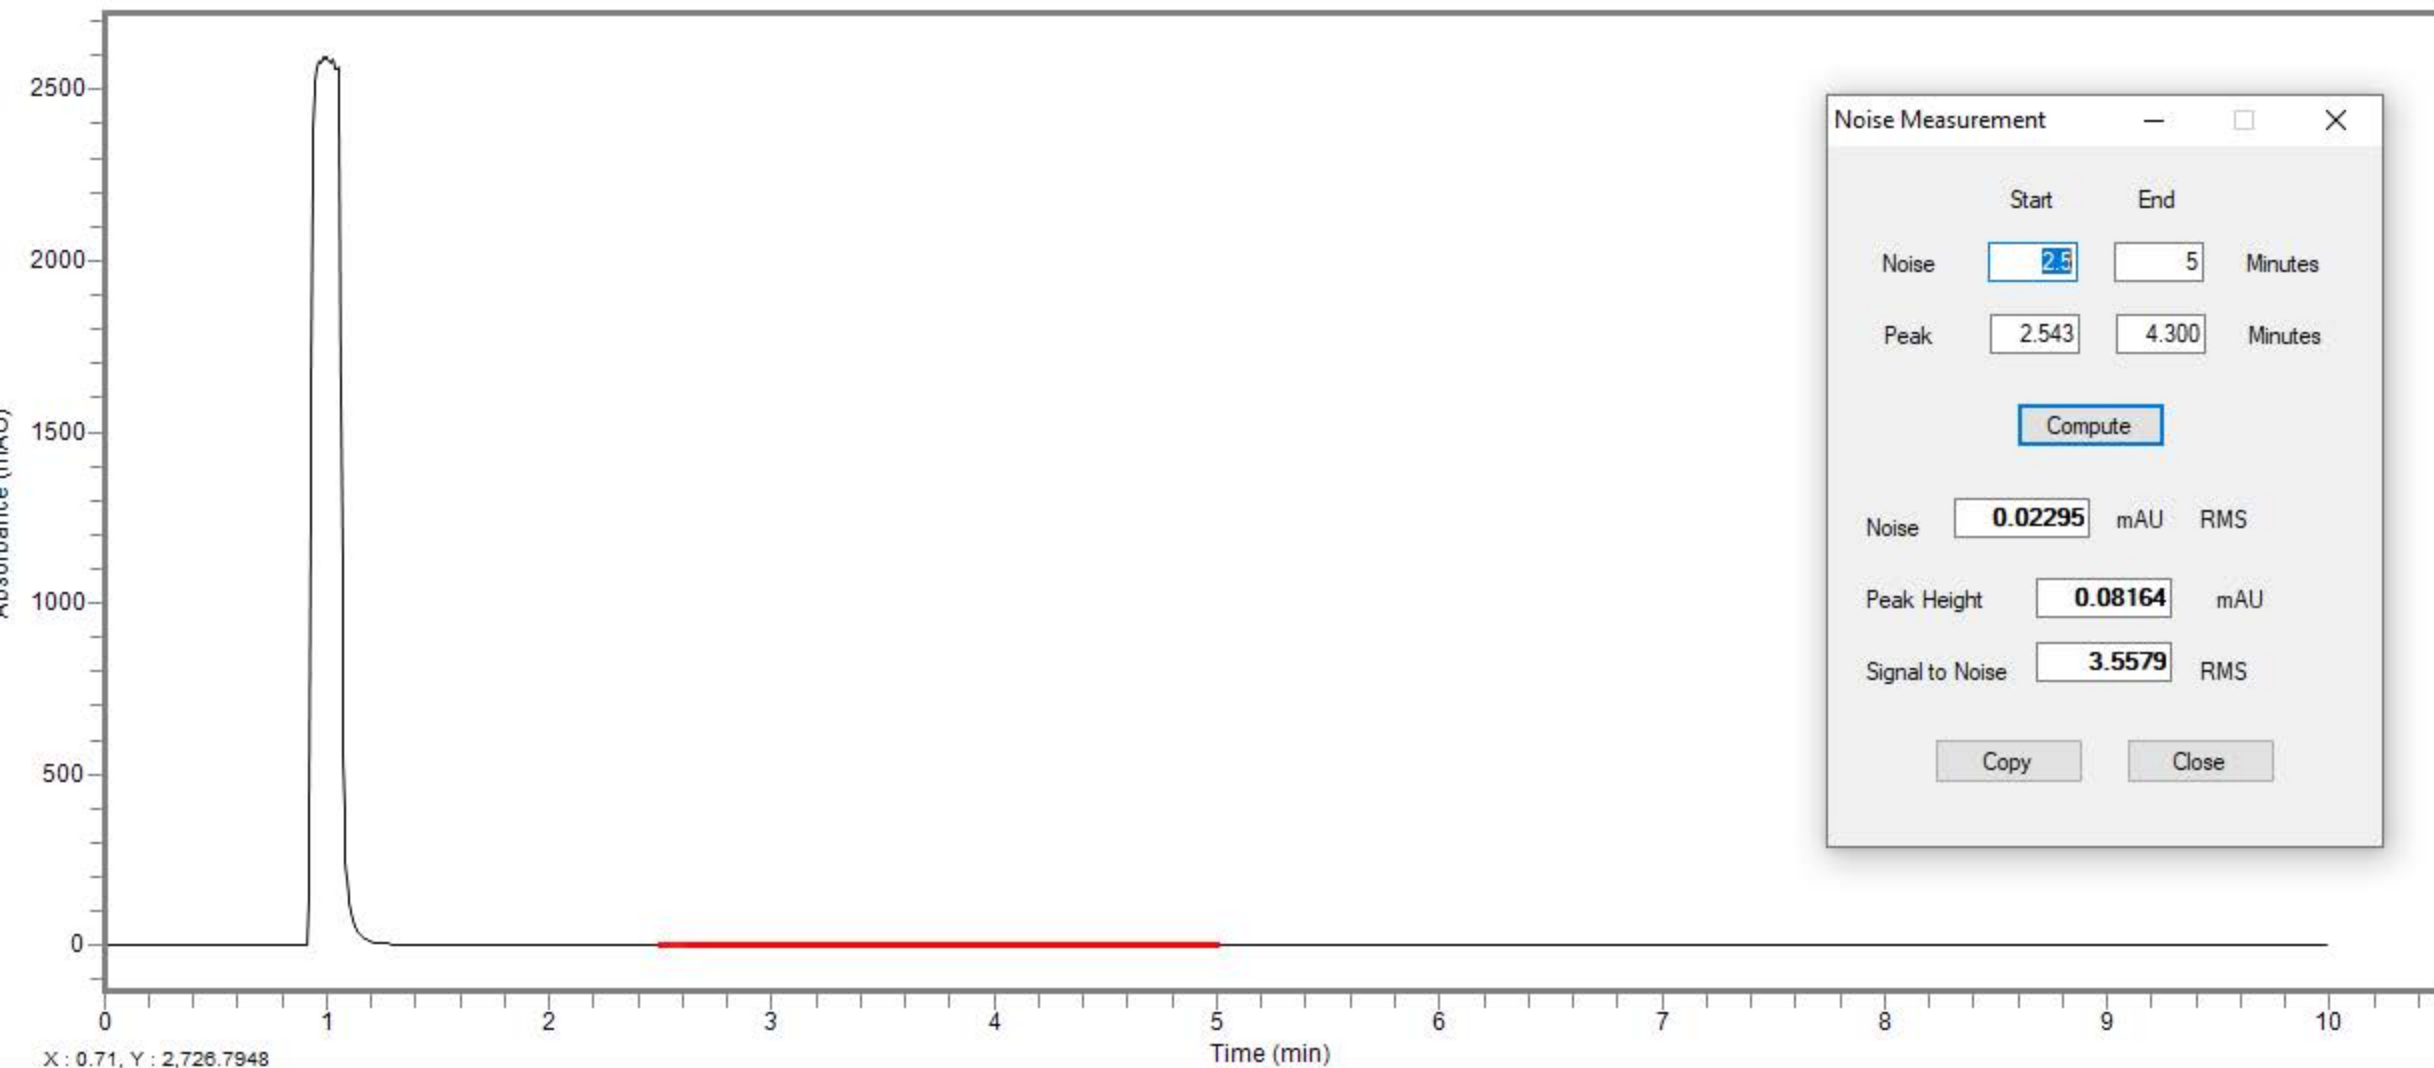

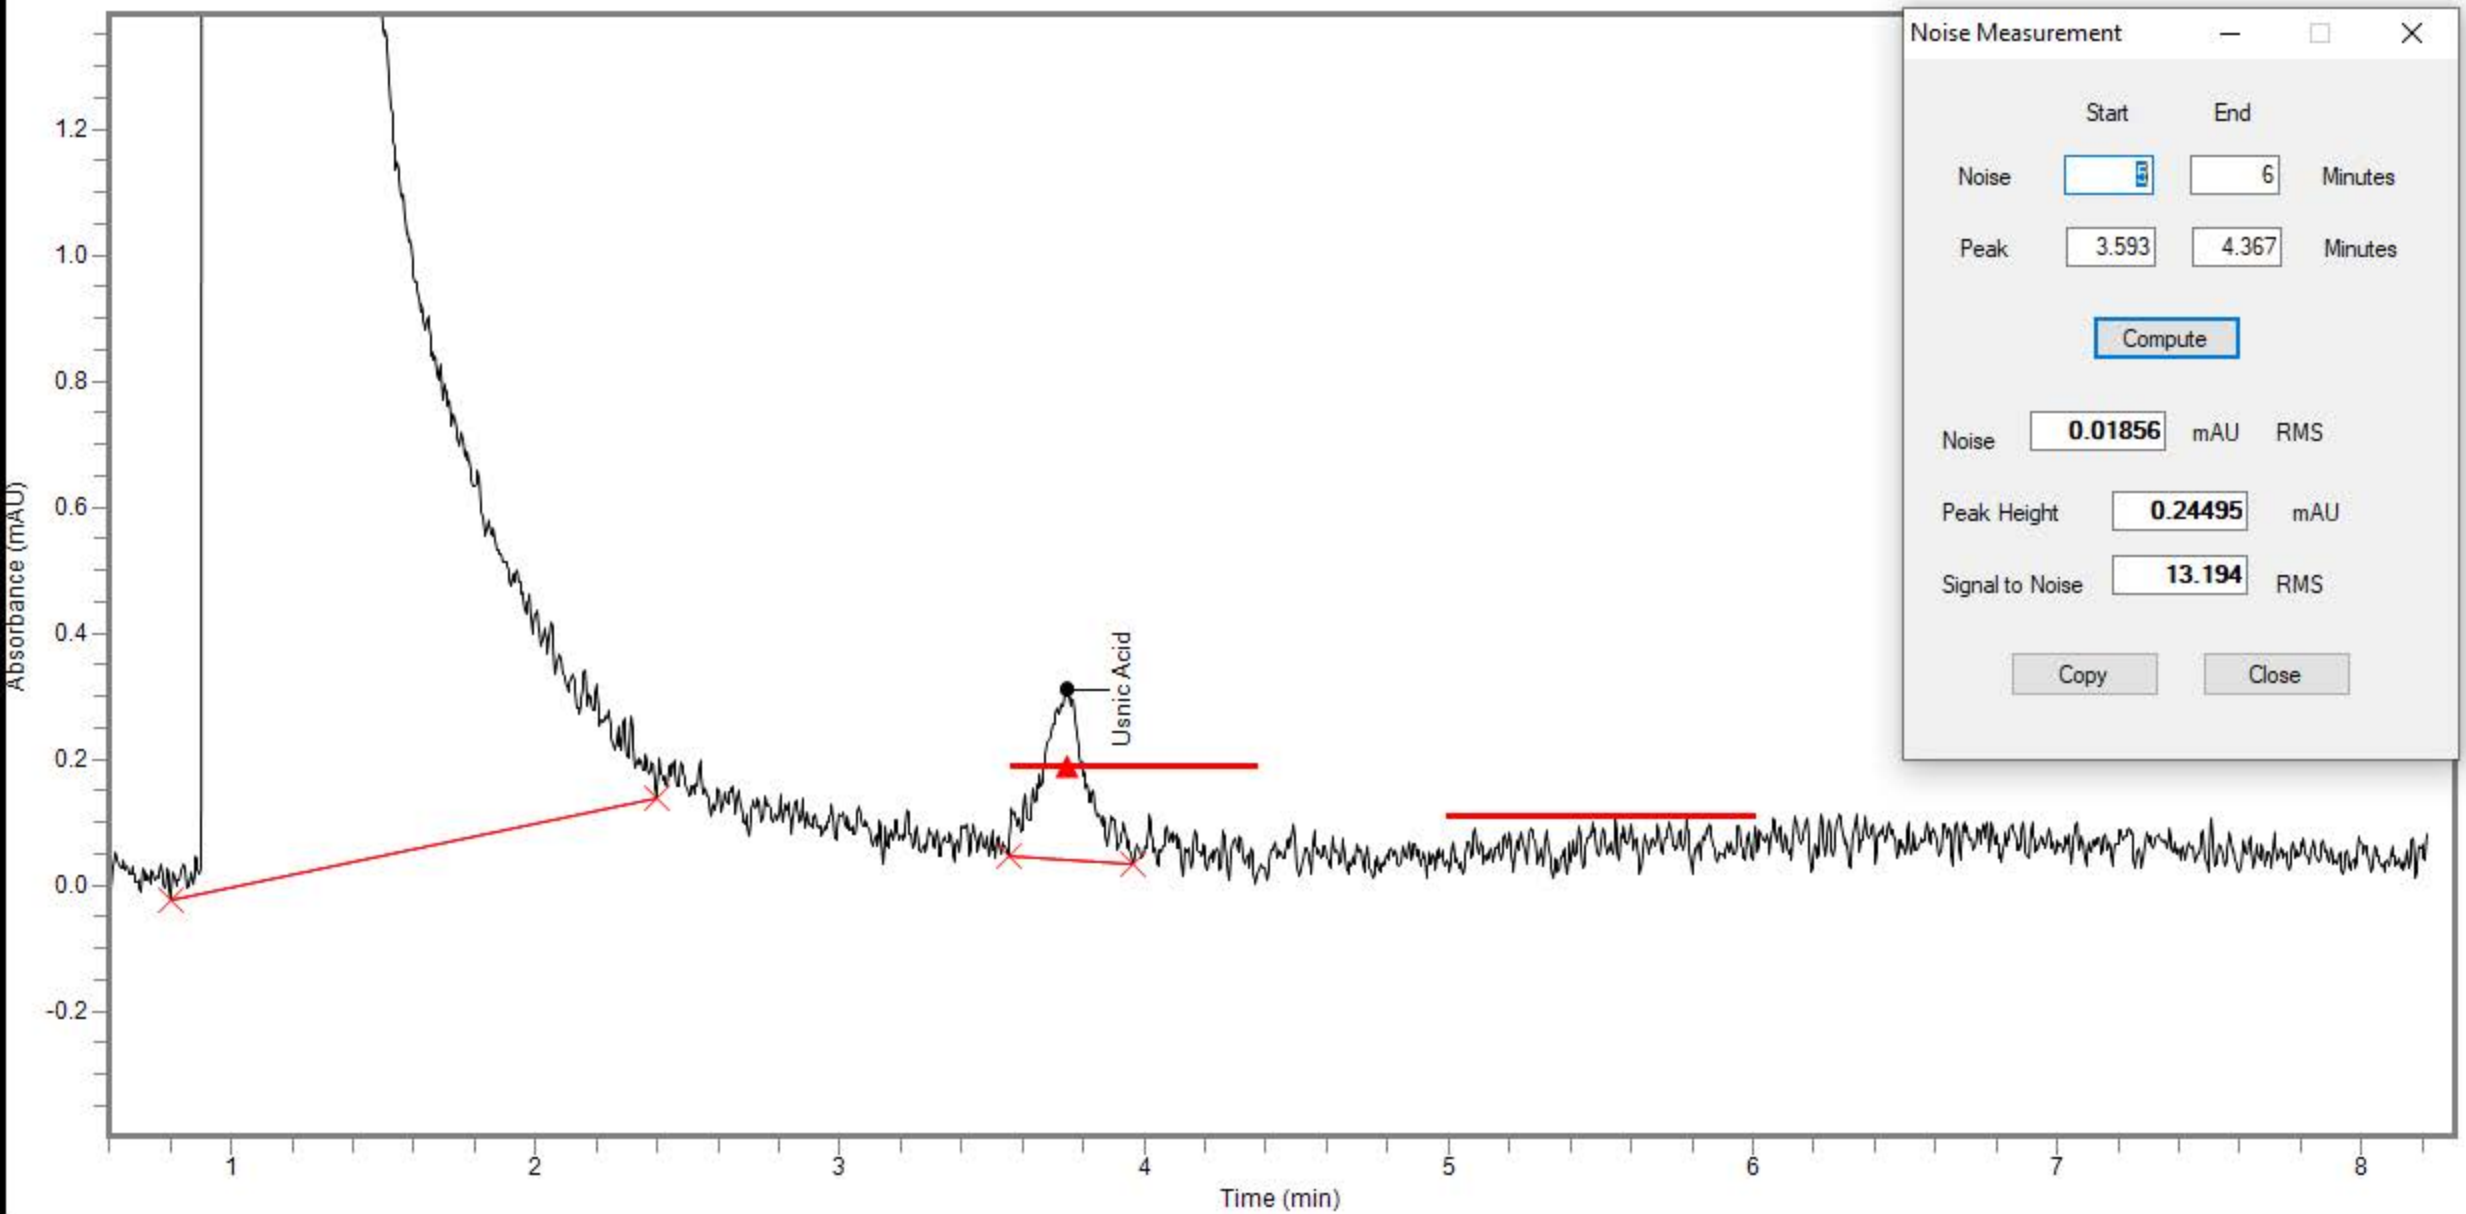

UA std 0.612 ug/mL : 282:10:400:10 : 1

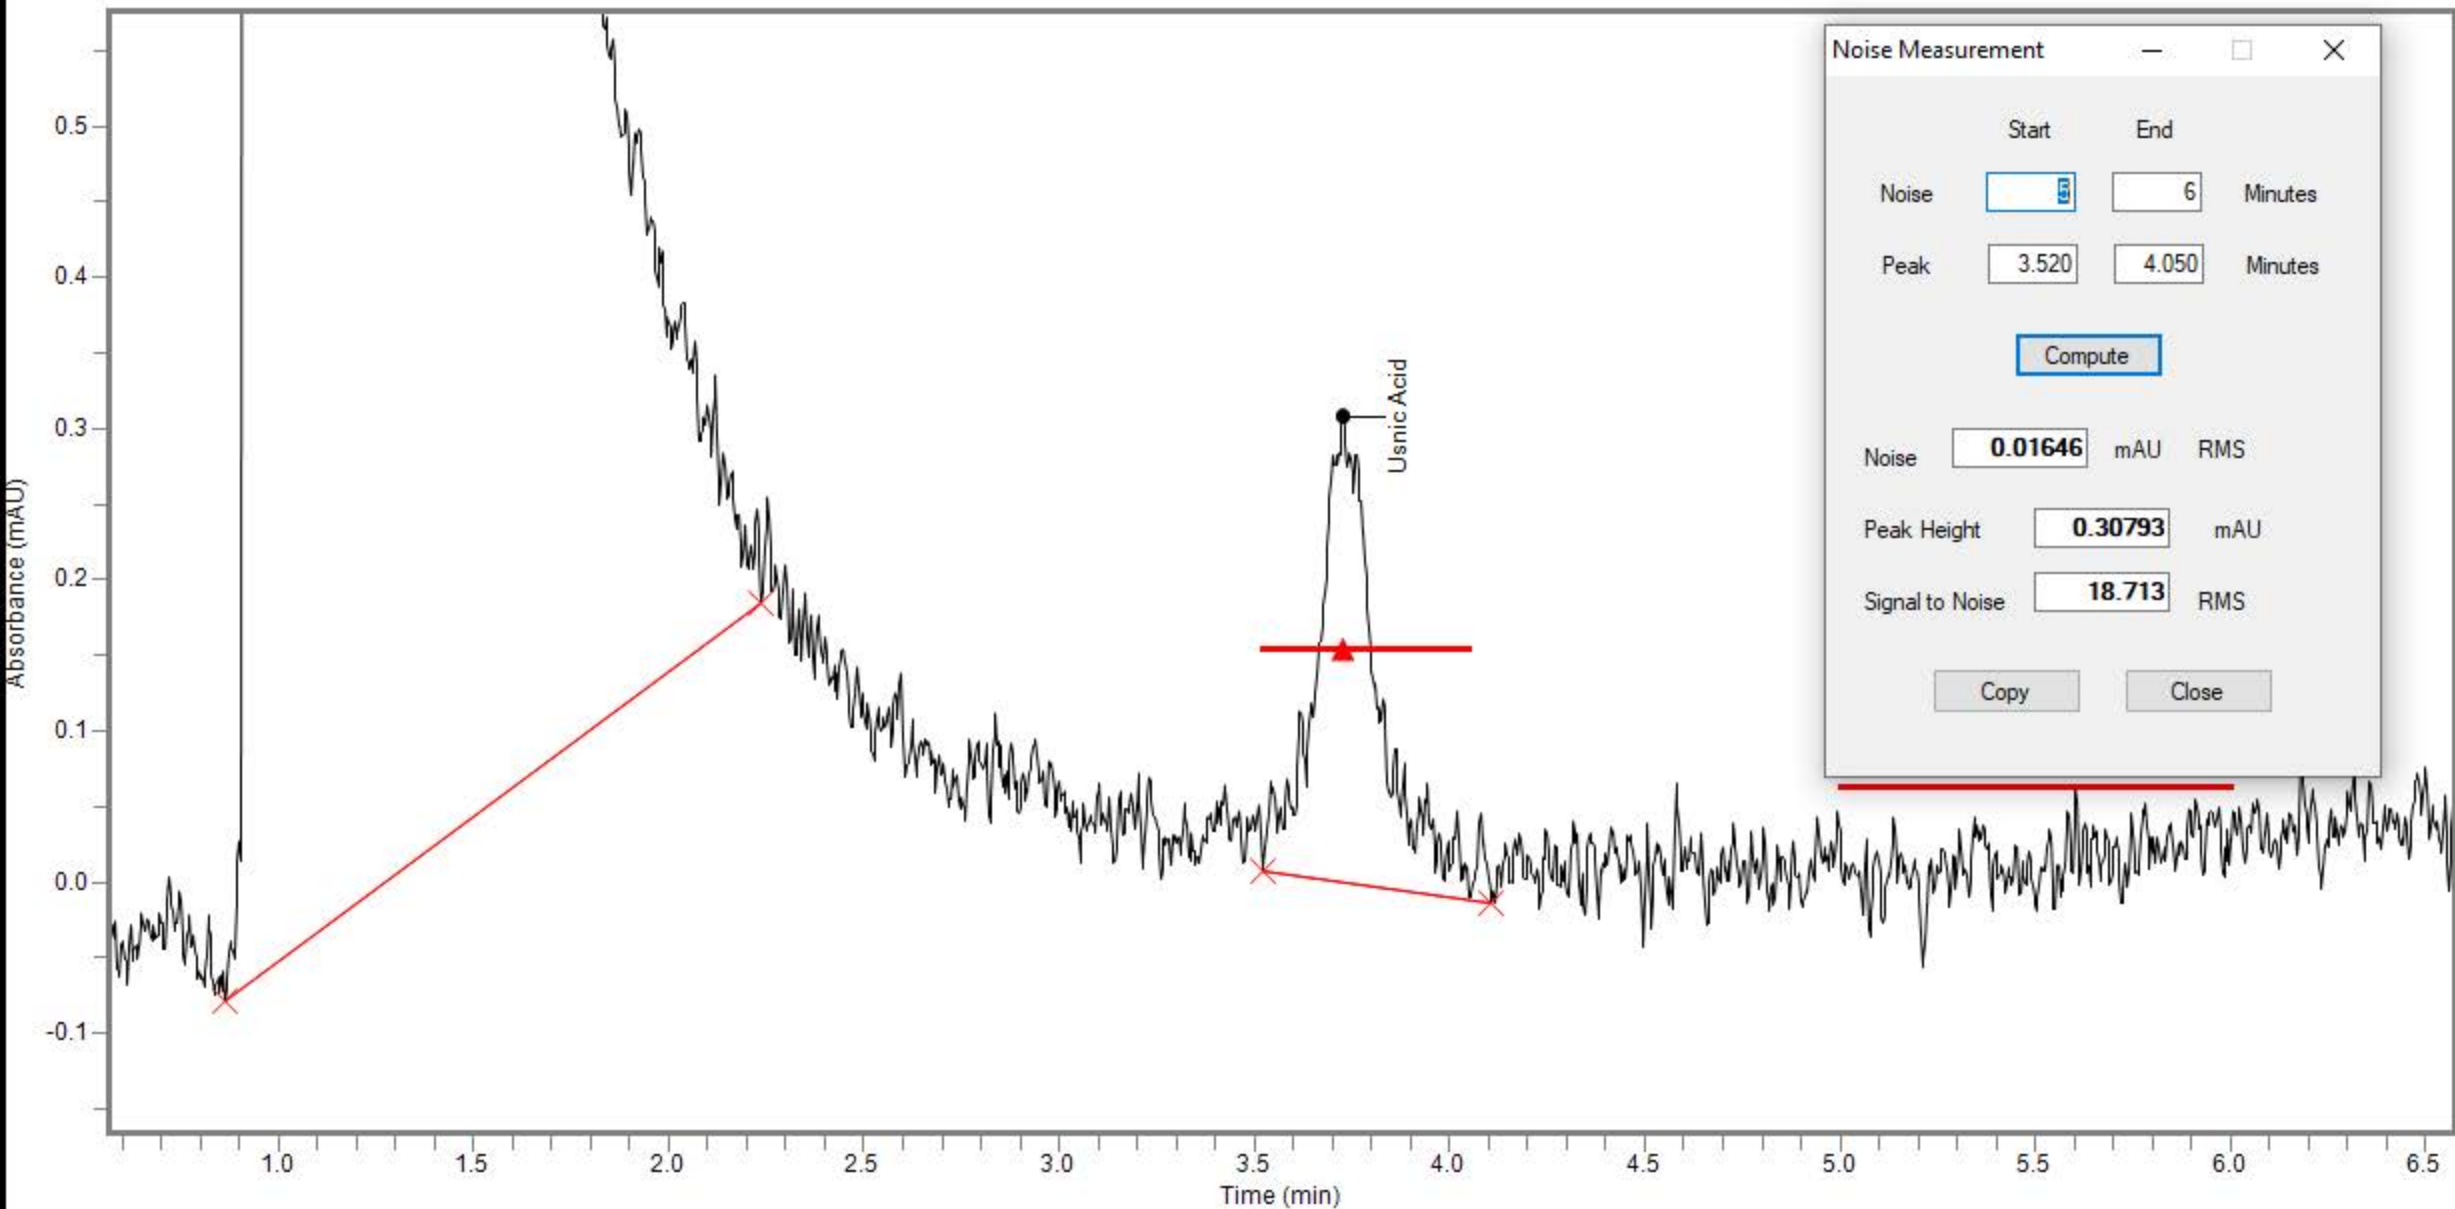

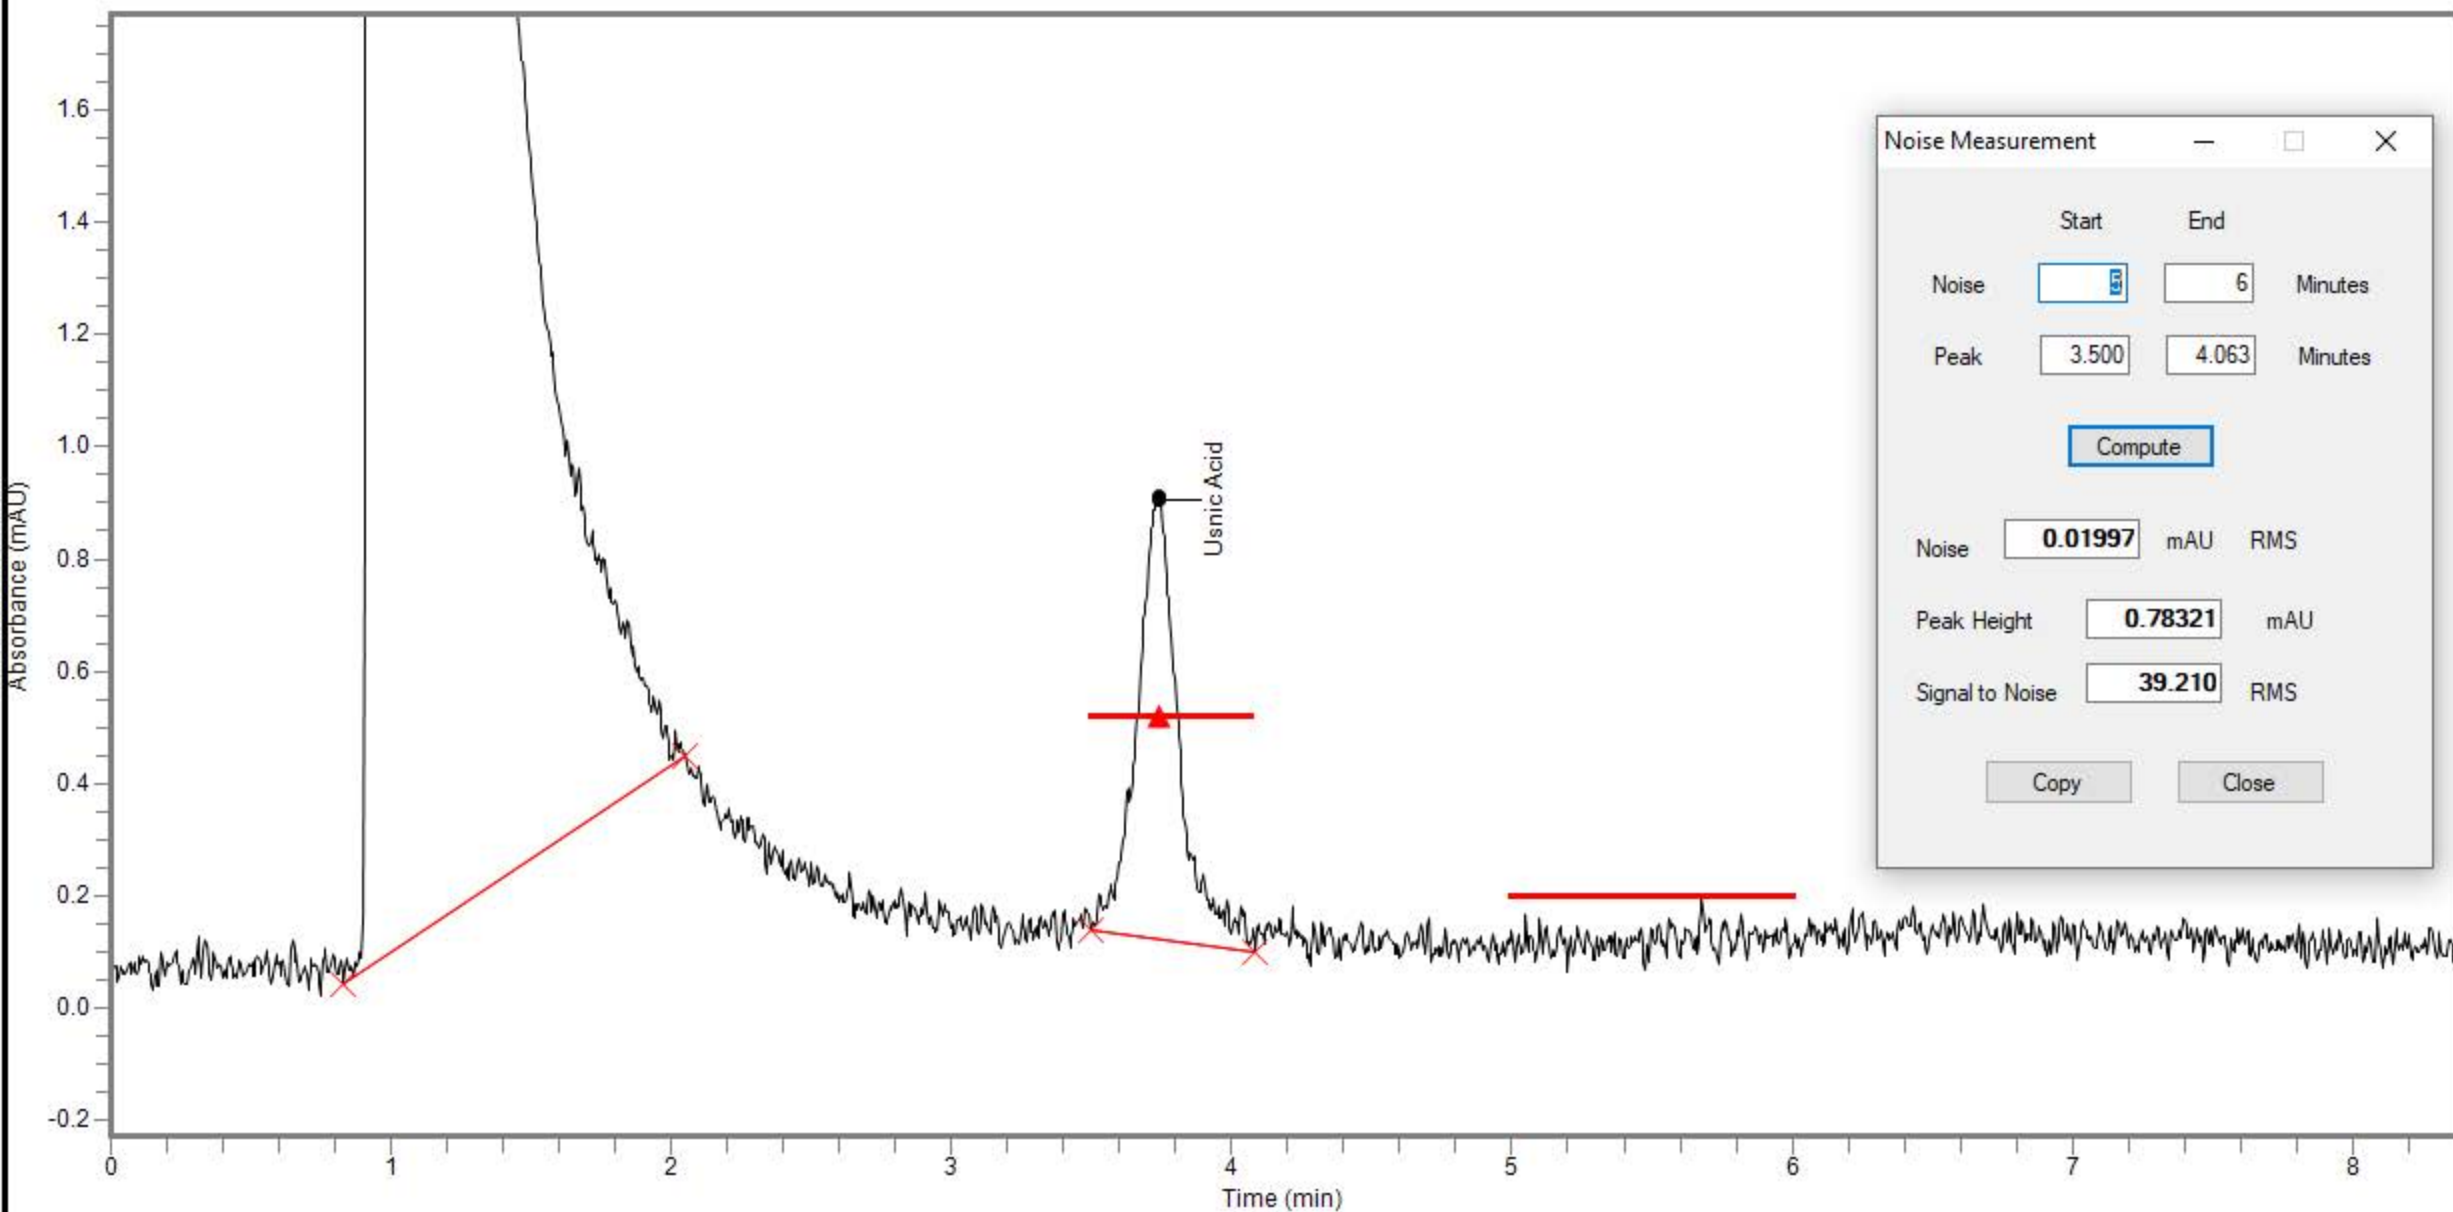

Supplement: s1 [file s1]

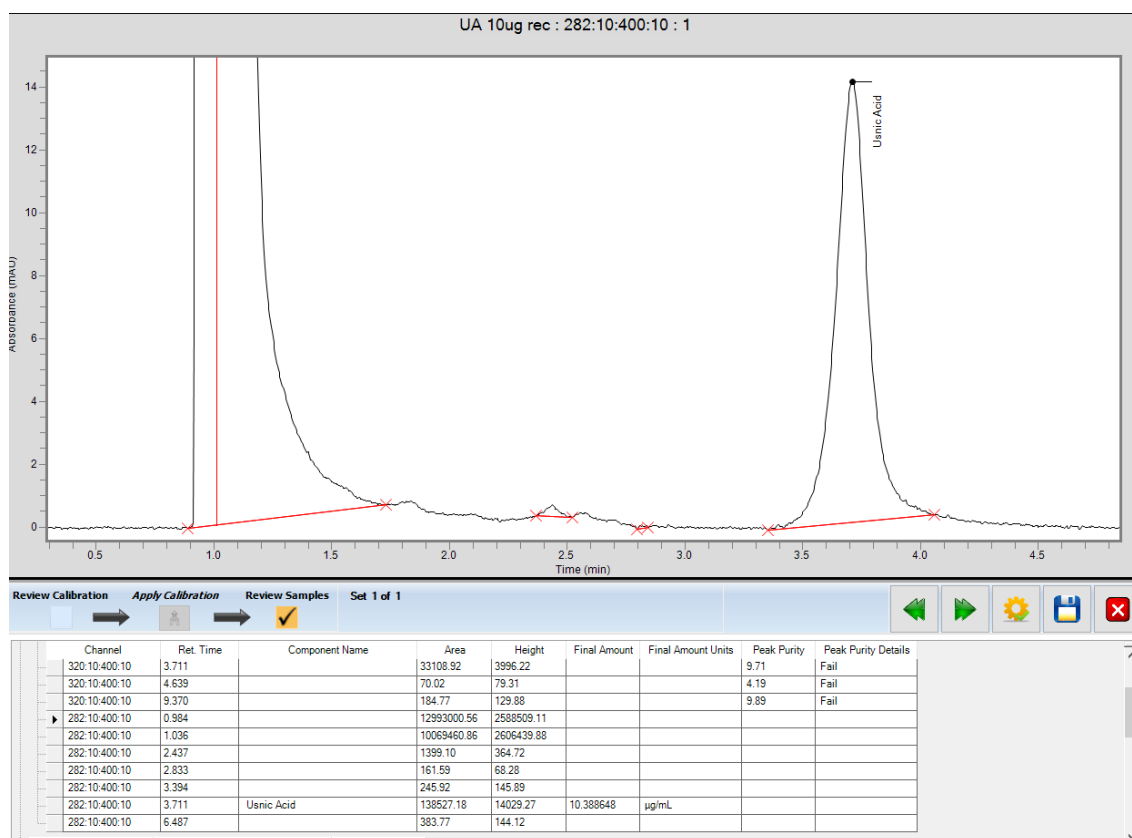

(a)

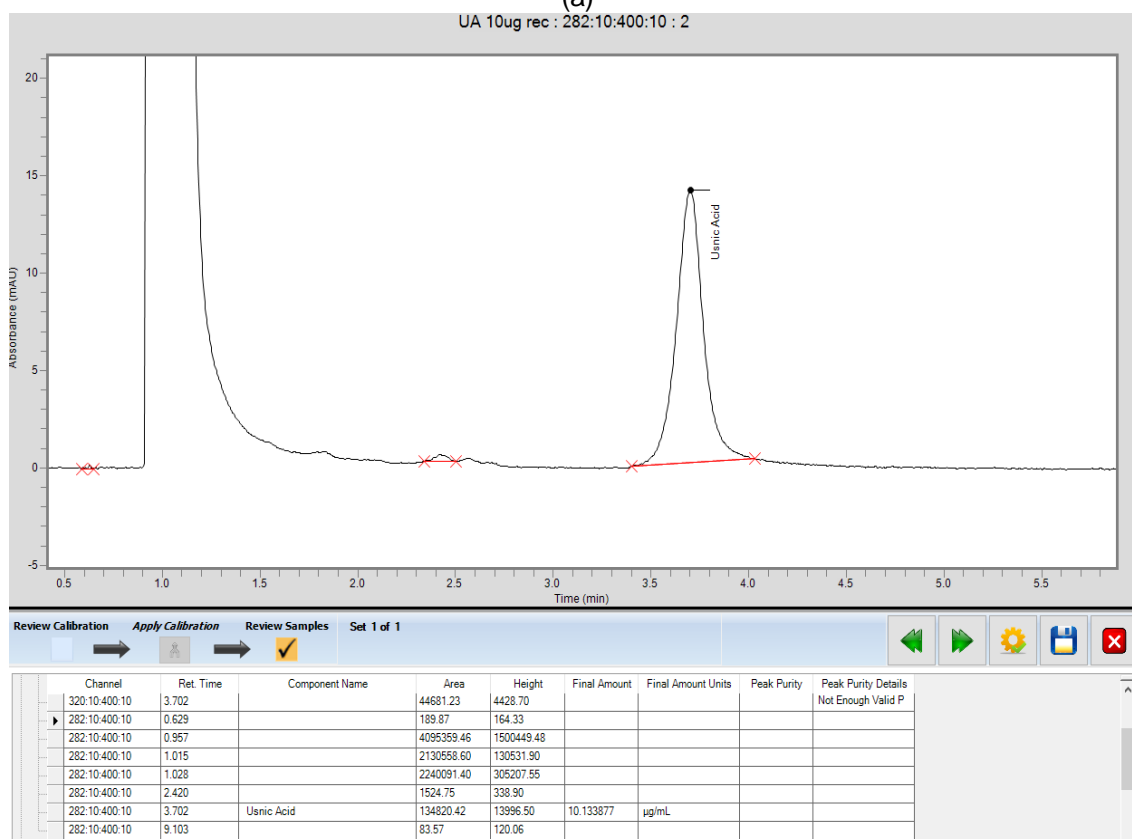

(b)

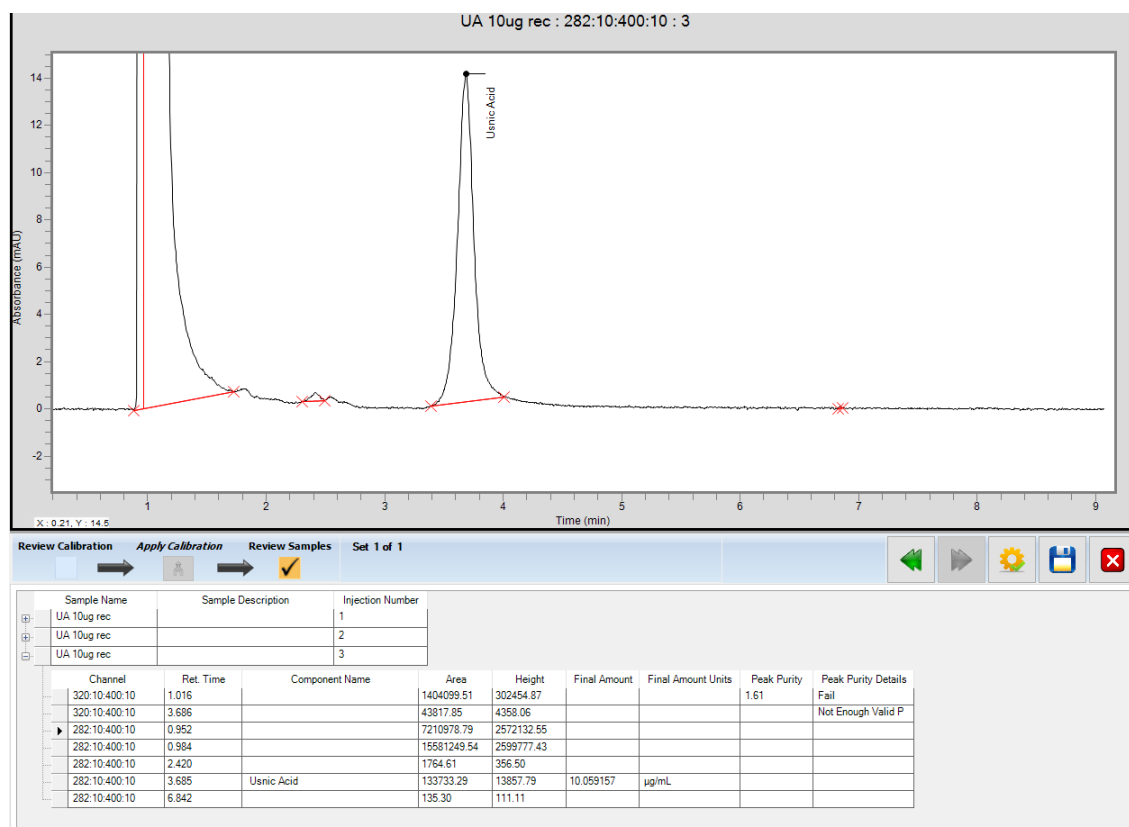

(c)

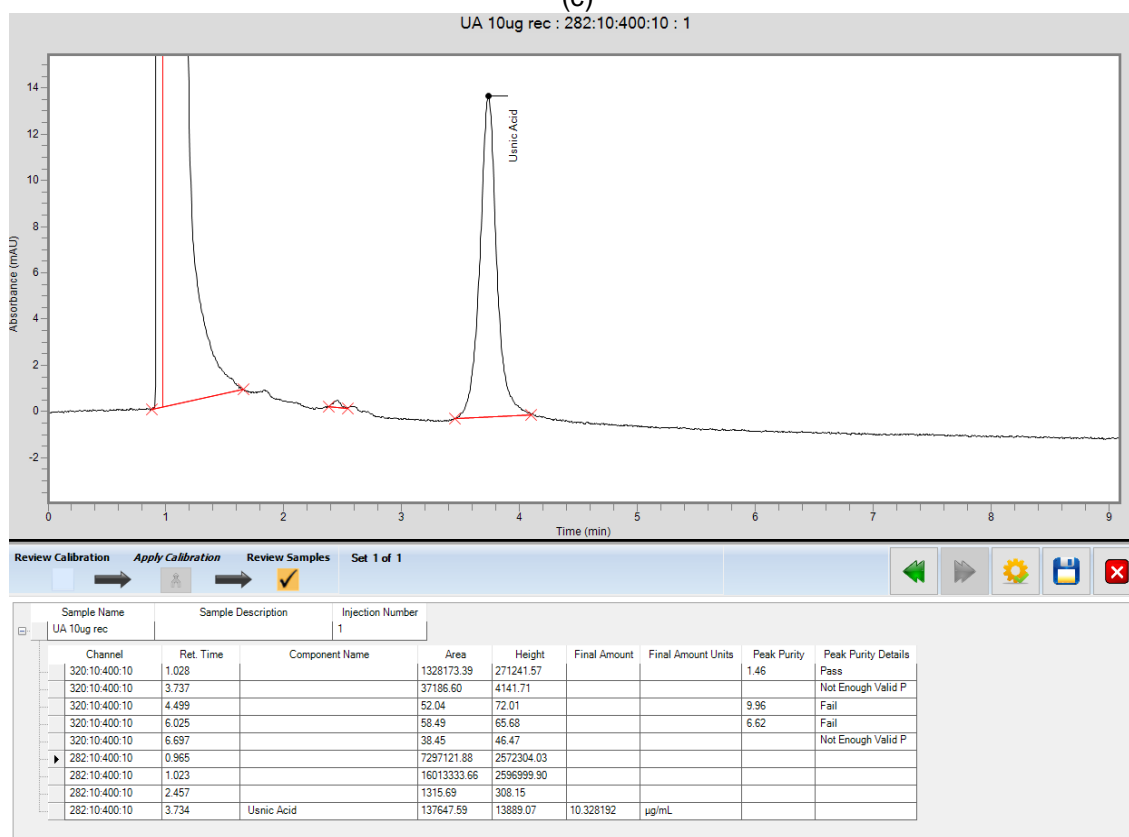

(d)

Figure S2. UA 10 µg recovery (a) Spike solution 1; (b) Spike solution 2; (c) Spike solution 3; (d) Spike solution 4.

Supplement: s1 [file s1]
